# Supplementary material for: Merging Regiodivergent Catalysis with Atom‐Economical Radical Arylation
Source: PubMed Central journal article supplement (PMC6852184; doi:10.1002/anie.201908860), 2019-08-28
Supplement: ANIE-58-14208-s001.pdf [file ANIE-58-14208-s001.pdf]

Supporting Information

**Merging Regiodivergent Catalysis with Atom-Economical Radical Arylation**

*Felix Mühlhaus<sup>+</sup>, Hendrik Weißbarth<sup>+</sup>, Tobias Dahmen, Gregor Schnakenburg, and Andreas Gansäuer\**

anie\_201908860\_sm\_miscellaneous\_information.pdf

## Table of Contents

|                                                                                                                                             |     |
|---------------------------------------------------------------------------------------------------------------------------------------------|-----|
| 1. General Information .....                                                                                                                | S5  |
| 1.1 Instruments .....                                                                                                                       | S5  |
| 2. General Procedures .....                                                                                                                 | S6  |
| 2.1 General procedure for bromination-epoxidation reaction sequence of allylic alcohols (GP1). .                                            | S6  |
| 2.2 General procedure for the hydrolytic kinetic resolution of terminal epoxides (GP2). .....                                               | S7  |
| 2.3.1 General procedure for the addition of anilide derivatives to terminal epoxides (GP3a). ....                                           | S7  |
| 2.3.2 General procedure for the aminolysis-epoxidation reaction sequence (GP3b). .....                                                      | S8  |
| 2.4 General procedures for the regiodivergent arylation of epoxides. ....                                                                   | S8  |
| 2.4.1 General procedure for the formation of tetrahydroquinolines GP4.....                                                                  | S8  |
| 2.4.2 General procedure for the formation of indolines (GP5). .....                                                                         | S9  |
| 3. Characterization of compounds .....                                                                                                      | S9  |
| 3.1 Synthesis of $\alpha$ -bromo-epoxides.....                                                                                              | S9  |
| 3.1.1. Synthesis of <i>syn</i> -3-bromo-1,2-epoxy-hexane.....                                                                               | S9  |
| 3.1.2. Synthesis of <i>syn</i> -3-brom-1,2-epoxy-octane. ....                                                                               | S11 |
| 3.1.3. Synthesis of <i>syn</i> -3-brom-1,2-epoxy-5-methyl-hexane. ....                                                                      | S13 |
| 3.2 Kinetic resolution of $\alpha$ -bromo-epoxides ( <i>rac</i> -A $\rightarrow$ A).....                                                    | S15 |
| 3.2.1 Kinetic resolution of <i>syn</i> -3-bromo-1,2-epoxy-hexane. ....                                                                      | S15 |
| 3.2.2 Kinetic resolution of <i>syn</i> -3-bromo-1,2-epoxy-octane. ....                                                                      | S15 |
| 3.2.3 Kinetic resolution of ( <i>syn</i> )-3-bromo-1,2-epoxy-5-methyl-hexane. ....                                                          | S16 |
| 3.3 Base mediated aminolysis of bromo-epoxides to aniline-epoxides (A $\rightarrow$ 1) .....                                                | S17 |
| 3.3.1. Synthesis of <i>N</i> -(((2 <i>R</i> ,3 <i>S</i> )-3-pentyloxiran-2-yl)methyl)- <i>N</i> -phenylaniline (1b). ....                   | S17 |
| 3.3.2. Synthesis of <i>N</i> -(((2 <i>R</i> ,3 <i>S</i> )-3-isobutyloxiran-2-yl)methyl)- <i>N</i> -phenylaniline (1c). ....                 | S19 |
| 3.3.3. Synthesis of <i>N</i> -isopropyl- <i>N</i> -(((2 <i>R</i> ,3 <i>S</i> )-3-propyloxiran-2-yl)methyl)aniline (1e). ....                | S21 |
| 3.3.4 Synthesis of <i>N</i> -Cyclopropyl- <i>N</i> -(((2 <i>R</i> ,3 <i>S</i> )-3-propyloxirane-2-yl)methyl)aniline (1f).....               | S23 |
| 3.3.5 Synthesis of 4-chloro- <i>N</i> -cyclohexyl- <i>N</i> -(((2 <i>R</i> ,3 <i>S</i> )-3-propyloxirane-2-yl)methyl)aniline (1h).<br>..... | S25 |

|                                                                                                                                      |     |
|--------------------------------------------------------------------------------------------------------------------------------------|-----|
| 3.3.6 Synthesis of 4-chloro- <i>N</i> -cyclopentyl- <i>N</i> -(((2 <i>R</i> ,3 <i>S</i> )-3-propyloxirane-2-yl)methyl)aniline (1i).  | S27 |
| 3.3.7 Synthesis of 4-chloro- <i>N</i> -isopropyl- <i>N</i> -(((2 <i>R</i> ,3 <i>S</i> )-3-propyloxiran-2-yl)methyl)aniline (1j). ... | S29 |
| 3.3.8 Synthesis of 4-fluoro- <i>N</i> -isopropyl- <i>N</i> -(((2 <i>R</i> ,3 <i>S</i> )-3-propyloxirane-2-yl)methyl)aniline (1k)..   | S31 |
| 3.3.9 Synthesis of <i>N</i> -cyclopropyl-4-fluoro- <i>N</i> -(((2 <i>R</i> ,3 <i>S</i> )-3-propyloxiran-2-yl)methyl)aniline (1l).    | S34 |
| 3.3.10 Synthesis of methyl 4-(methyl(((2 <i>R</i> ,3 <i>S</i> )-3-propyloxiran-2-yl)methyl)amino)benzoate (1n).                      | S37 |
| 3.4 SiO <sub>2</sub> -catalyzed aminolysis of bromo-epoxides to bromo-alcohols and subsequent formation of aniline-epoxides (A→1).   | S39 |
| 3.4.1. Synthesis of <i>N</i> -phenyl- <i>N</i> -(((2 <i>R</i> ,3 <i>S</i> )-3-propyloxiran-2-yl)methyl)aniline (1a).                 | S39 |
| 3.4.2. Synthesis of <i>N</i> -cyclohexyl- <i>N</i> -(((2 <i>R</i> ,3 <i>S</i> )-3-propyloxiran-2-yl)methyl)aniline (1d).             | S42 |
| 3.4.3. Synthesis of <i>N</i> -methyl- <i>N</i> -(((2 <i>R</i> ,3 <i>S</i> )-3-propyloxiran-2-yl)methyl)aniline (1g).                 | S45 |
| 3.4.4. Synthesis of 4-chloro- <i>N</i> -methyl- <i>N</i> -(((2 <i>R</i> ,3 <i>S</i> )-3-propyloxiran-2-yl)methyl)aniline (1m).       | S48 |
| 3.5.1. Synthesis of 4-iodo- <i>N</i> -methyl- <i>N</i> -(((2 <i>R</i> ,3 <i>S</i> )-3-propyloxiran-2-yl)methyl)aniline (1o).         | S51 |
| 3.5.2 Synthesis of <i>N</i> -cyclohexyl-4-iodo- <i>N</i> -(((2 <i>R</i> ,3 <i>S</i> )-3-propyloxiran-2-yl)methyl)aniline (1p).       | S53 |
| 4. REO-ArS <sub>R</sub>                                                                                                              | S55 |
| 4.1 Investigation of different catalysts for the REO-ArS <sub>R</sub> with epoxide 1a.                                               | S55 |
| 4.2 Structural assignment of the tetrahydroquinoline-scaffold and configurational analysis with tetrahydroquinolines 2a and 2g.      | S56 |
| 4.3 Synthesis of tetrahydroquinolines by REO-ArS <sub>R</sub> .                                                                      | S59 |
| 4.3.1 Synthesis of (3 <i>S</i> ,4 <i>R</i> )-1-Phenyl-4-propyl)-1,2,3,4-tetrahydroquinoline-3-ol (2a).                               | S59 |
| 4.3.2 Synthesis of (3 <i>S</i> ,4 <i>R</i> )-4-isobutyl-1-phenyl-4-propyl)-1,2,3,4-tetrahydroquinoline-3-ol (2c).                    | S61 |
| 4.3.3 Synthesis of (3 <i>S</i> ,4 <i>R</i> )-1-cyclohexyl-4-propyl)-1,2,3,4-tetrahydroquinoline-3-ol (2d).                           | S63 |
| 4.3.4 Synthesis of (3 <i>S</i> ,4 <i>R</i> )-1-isopropyl-4-propyl)-1,2,3,4-tetrahydroquinoline-3-ol (2e).                            | S65 |
| 4.3.5 Synthesis of (3 <i>S</i> ,4 <i>R</i> )-1-cyclopropyl-4-propyl-1,2,3,4-tetrahydroquinolin-3-ol (2f).                            | S67 |
| 4.3.6 Synthesis of (3 <i>S</i> ,4 <i>R</i> )-1-methyl-4-propyl)-1,2,3,4-tetrahydroquinoline-3-ol (2g).                               | S69 |
| 4.3.7 Synthesis of (3 <i>S</i> ,4 <i>R</i> )-6-chloro-1-cyclohexyl-4-propyl-1,2,3,4-tetrahydroquinolin-3-ol (2h).                    | S71 |
| 4.3.8 Synthesis of (3 <i>S</i> ,4 <i>R</i> )-6-chloro-1-isopropyl-4-propyl-1,2,3,4-tetrahydroquinolin-3-ol (2j).                     | S73 |

|                                                                                                                                          |      |
|------------------------------------------------------------------------------------------------------------------------------------------|------|
| 4.3.9 (3 <i>S</i> ,4 <i>R</i> )-1-cyclopropyl-6-fluoro-4-propyl-1,2,3,4-tetrahydroquinolin-3-ol (2l). .....                              | S75  |
| 4.3.10 Synthesis of (3 <i>S</i> ,4 <i>R</i> )-6-chloro-1-methyl-4-propyl-1,2,3,4-tetrahydroquinoline-3-ol (2m).<br>.....                 | S78  |
| 4.3.11 Synthesis of Methyl-(3 <i>S</i> ,4 <i>R</i> )-3-hydroxy-1-methyl-4-propyl-1,2,3,4-tetrahydroquinoline-6-<br>carboxylate (2n)..... | S80  |
| 4.3.12 Synthesis of (3 <i>S</i> ,4 <i>R</i> )-6-iodo-1-methyl-4-propyl-1,2,3,4-tetrahydroquinoline-3-ol (2o). S82                        |      |
| 4.4. Synthesis of indolines 3 by REO-ArS <sub>R</sub> .....                                                                              | S84  |
| 4.4.1 ( <i>S</i> )-1-(( <i>R</i> )-1-phenylindolin-3-yl)-butan-1-ol (3a). .....                                                          | S84  |
| 4.4.2 Synthesis of ( <i>S</i> )-1-(( <i>R</i> )-1-phenylindolin-3-yl)-hexan-1-ol (3b). .....                                             | S86  |
| 4.4.3 Synthesis of ( <i>S</i> )-3-methyl-1-(( <i>R</i> )-1-phenylindolin-3-yl)-butan-1-ol (3c). .....                                    | S88  |
| 4.4.4 Synthesis of ( <i>S</i> )-1-(( <i>R</i> )-1-cyclohexylindolin-3-yl)-butan-1-ol (3d).....                                           | S90  |
| 4.4.5 Synthesis of ( <i>S</i> )-1-(( <i>R</i> )-1-isopropylindolin-3-yl)-butan-1-ol (3e).....                                            | S92  |
| 4.4.6 Synthesis of ( <i>S</i> )-1-(( <i>R</i> )-5-chloro-1-cyclohexylindolin-3-yl)butan-1-ol (3h). .....                                 | S94  |
| 4.4.7 Synthesis of ( <i>S</i> )-1-(( <i>R</i> )-5-chloro-1-cyclopentylindolin-3-yl)butan-1-ol (3i).....                                  | S96  |
| 4.4.8 Synthesis of ( <i>S</i> )-1-(( <i>R</i> )-5-chloro-1-isopropylindolin-3-yl)butan-1-ol (3j). .....                                  | S98  |
| 4.4.9 Synthesis of ( <i>S</i> )-1-(( <i>R</i> )-5-fluoro-1-isopropylindolin-3-yl)butan-1-ol (3k).....                                    | S100 |
| 4.4.10 Synthesis of ( <i>S</i> )-1-(( <i>R</i> )-1-cyclohexyl-5-iodoindolin-3-yl)butan-1-ol (3p). .....                                  | S103 |
| 5. Synthesis of catalysts for the REO-ArS <sub>R</sub> .....                                                                             | S105 |
| 5.1 Synthesis of cat-(OTs) <sub>2</sub> .....                                                                                            | S105 |
| 6. References.....                                                                                                                       | S107 |



## 1. General Information

All Reactions involving air- and moisture sensitive substances were carried out in flame dried glassware under argon atmosphere using standard Schlenk technique. The THF used in the reactions was freshly distilled over Na before use. All reactions were monitored by thin-layer chromatography (TLC) on *Merck* silica gel F<sub>254</sub> plates using UV light as visualizing agent (if applicable) and a solution of ammoniummolybdate tetrahydrate (25g/L) and Ce(SO<sub>4</sub>)<sub>2</sub>•4H<sub>2</sub>O (10g/L) in 10% aqueous H<sub>2</sub>SO<sub>4</sub> followed by heating as developing agents. The crude products were purified by Flash column chromatography on *Merck* silica gel 50 if not stated otherwise.

### 1.1 Instruments

<sup>1</sup>H NMR and <sup>13</sup>C NMR spectra were measured on *Bruker* AMX 300 MHz, 400 MHz or 500 MHz spectrometers. <sup>1</sup>H NMR chemical shifts ( $\delta_{\text{H}}$ ) are given in ppm and calibrated by using the residual peak of the undeuterated solvent (CHCl<sub>3</sub> 7.26 ppm or C<sub>6</sub>H<sub>5</sub>D 7.16 ppm) as internal reference. <sup>13</sup>C NMR shifts are noted in ppm ( $\delta_{\text{C}}$ ) using the solvent peak as internal reference (CDCl<sub>3</sub> 77.0 ppm or C<sub>6</sub>D<sub>6</sub> 128.0 ppm). Coupling constants are reported in Hz and represent  $J_{\text{H,H}}$  couplings, unless explicitly stated otherwise. The diastereomeric and regioisomeric ratios of the products were determined by <sup>13</sup>C NMR spectroscopy of the crude mixtures. It has been demonstrated that the NMR techniques used here are accurate for the determination of diastereomeric and regioisomeric ratios.<sup>[1]</sup> Compared to <sup>1</sup>H NMR spectroscopy the errors of the ratios in <sup>13</sup>C NMR spectroscopy are typically less than 2% and therefore within experimental error. IR spectra were recorded on *Nicolet* ATR-IR-Spectrometer TM 380 as neat films on KBr plates. High resolution mass spectra were measured using a *Thermo Fisher Scientific* Orbitrap XL mass spectrometer by ESI(+) measurement. Enantiomeric ratios were determined by chiral HPLC on a *Daicel* Chiralpak IC-U column. The  $\alpha_{\text{D}}^{20}$  values were measured in chloroform (10 g/L) on the MCP 150 polarimeter by *Anton Paar*.

The data collection for the single crystal x-Ray analysis was performed on a *Bruker* D8-Venture diffractometer using multi-layer optics monochromated Cu-K $\alpha$  irradiation ( $\lambda = 1.54178 \text{ \AA}$ ). The diffractometer was equipped with a low-temperature device (Oxford Cryostream 800er series, Oxford Cryosystems, 100(2) K). Intensities were measured by fine-slicing  $\omega$  and  $\varphi$ -scans and

corrected for background, polarization and Lorentz effects. For all data sets an empirical absorption correction was applied. The structures were solved by intrinsic phasing methods and refined anisotropically by the least-square procedure implemented in the SHELX program system.<sup>[2]</sup> All hydrogen atoms were included using the riding model on the bound carbon atoms.

CCDC numbers 1910522 (**2g**) and 1910523 (**3a**) contain the supplementary crystallographic data for this paper, which can be obtained free of charge from the Cambridge Crystallographic Data Centre via [www.ccdc.cam.ac.uk/data\\_request/cif](http://www.ccdc.cam.ac.uk/data_request/cif).

## 2. General Procedures

### 2.1 General procedure for bromination-epoxidation reaction sequence of allylic alcohols (GP1).

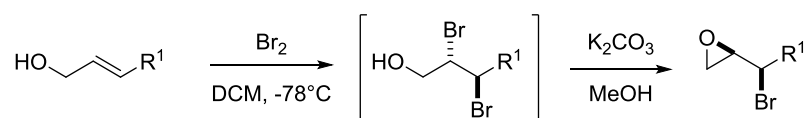

A solution of allylic alcohol (1.0 eq.) in CH<sub>2</sub>Cl<sub>2</sub> (0.5 mmol/mL) is cooled to -78°C. Over a period of 1h bromine (1.0 eq.) is added via dropping funnel and the reaction is stirred for 1h at -78°C. The reaction is quenched by addition of saturated NaHSO<sub>3</sub> solution (2 mL/mmol substrate). After warming up to room temperature ¼ of the solvent is removed, phases are separated, and the aqueous phase is extracted twice with CH<sub>2</sub>Cl<sub>2</sub>. The combined organic extracts are dried over MgSO<sub>4</sub> and the solvent is removed under reduced pressure. The product was used without further purification.<sup>[3]</sup> α-bromo alcohol (1.0 eq.) is dissolved in methanol (2 mL/mmol) and finely ground K<sub>2</sub>CO<sub>3</sub> (2.0 eq.) is added. The mixture is stirred for 3 h and the reaction progress is monitored by TLC. After complete conversion ¼ of the methanol is removed *in vacuo* and the residue is mixed with ethyl acetate (2 mL/mmol). K<sub>2</sub>CO<sub>3</sub> is removed via vacuum filtration and the solvent is evaporated. The crude product is purified via flash column chromatography (silica, Eluent: CH : MTBE 98:2) or distillation (60°C, 10 mbar) depending on reaction scale.<sup>[4]</sup>

## 2.2 General procedure for the hydrolytic kinetic resolution of terminal epoxides (GP2).

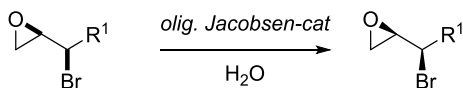

(*S,S*)- or (*R,R*)-oligomeric *Jacobsen* catalyst (0.05 mg/mmol substrate) is added to the racemic terminal epoxide (1.0 eq.). H<sub>2</sub>O (0.53 eq.) is added dropwise and after completed addition the reaction mixture is stirred for 16h. The crude product is purified via flash column chromatography (silica, Eluent: CH : MTBE 98:2).<sup>[5]</sup> The er of the product is determined via chiral HPLC.

### 2.3.1 General procedure for the addition of anilide derivatives to terminal epoxides (GP3a).

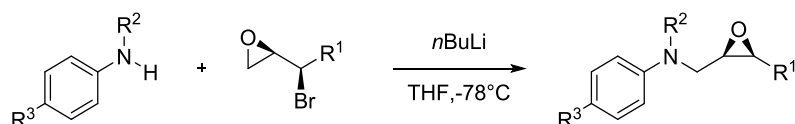

A solution of aniline derivative (1.0 eq.) in THF (0.5 mmol/mL) is cooled down to -78°C and *n*BuLi solution (2.5M in hexane, 1.2 eq.) is added dropwise. The mixture is stirred for 30 min followed by addition of the terminal *syn*-bromo-epoxide (1.2 eq.). The reaction is allowed to warm to room temperature over 16h. The reaction is quenched by addition of saturated NH<sub>4</sub>Cl solution (2 mL/mmol aniline). The phases are separated, and the aqueous layer is extracted with diethylether three times. The combined organic extracts are washed with water and brine, then dried over Na<sub>2</sub>SO<sub>4</sub> and the solvent is removed. The crude product is purified via flash column chromatography (silica, Eluent: CH : MTBE, 98:2). The resulting compounds can be air sensitive.<sup>[6]</sup>

### 2.3.2 General procedure for the aminolysis-epoxidation reaction sequence (GP3b).

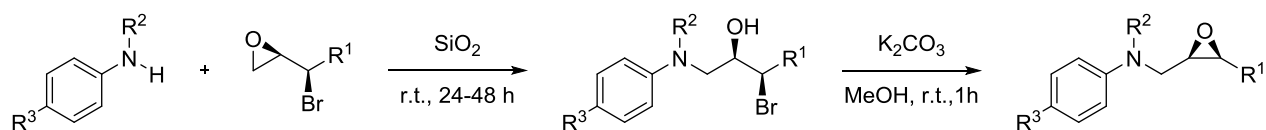

A round bottom flask is charged with Aniline derivative (1.0 eq.), terminal *syn*-bromo-epoxide (1.0 eq.) and SiO<sub>2</sub> (20% of the weight of both reactants). If not stated otherwise the reaction mixture is stirred at room temperature for 24-48h and progress is monitored via TLC. 5 mL of DCM are added, and the suspension is allowed to stir for another 30 min. The mixture is filtered, and all volatiles are removed *in vacuo*. The crude is purified via flash column chromatography (SiO<sub>2</sub>, Eluent: CH : MTBE, 97:3). The obtained *syn*-bromo-alcohol (1.0 eq.) is dissolved in 5 mL MeOH and freshly ground K<sub>2</sub>CO<sub>3</sub> (2.0 eq.) is added. The mixture is heated to 40°C and is stirred for 1h. The reaction progress is monitored via TLC. After cooling to room temperature 50 mL of Et<sub>2</sub>O are added, K<sub>2</sub>CO<sub>3</sub> is removed via filtration and the solution is concentrated *in vacuo*. The crude product is purified via flash column chromatography (SiO<sub>2</sub>, eluent: CH : MTBE 99:1).<sup>[7]</sup>

### 2.4 General procedures for the regiodivergent arylation of epoxides.

#### 2.4.1 General procedure for the formation of tetrahydroquinolines GP4.

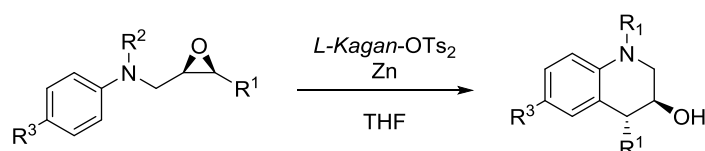

A Schlenk tube is charged with **cat-(OTs)<sub>2</sub>** (= *L-Kagan*-(OTs)<sub>2</sub>) (*L*-cat-OTs<sub>2</sub> 40 mg, 0.05 mmol, 0.1 eq.) and zinc powder (10 mg, 0.15 mmol, 0.3 eq.). The tube is evacuated for 15 min and then flushed with argon. Afterwards 1 mL of dry THF is added, which results in a red solution. The solution is stirred for at least five minutes. Once the color of the solution has changed from red to turquoise the substrate (0.5 mmol, 1.0 eq.) is added via syringe. The syringe is flushed with 1.5 mL of THF and the reaction mixture is allowed to stir for 48 h at room temperature. Afterwards the reaction mixture is filtered through a silica plug and flushed with Diethylether. The solvent is removed under reduce pressure and the crude product is purified via flash column chromatography (silica, Eluent: CH : MTBE 9:1). The diastereoselectivity and the regioselectivity is determined by <sup>13</sup>C NMR analysis of the crude product.

## 2.4.2 General procedure for the formation of indolines (GP5).

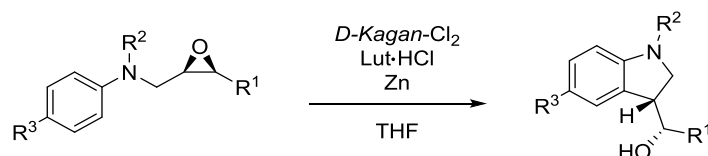

A Schlenk tube is charged with lutidine hydrochloride (Lut•HCl 22 mg, 0.15 mmol, 0.3 eq.), which is resublimed *in vacuo*. Zinc powder (10 mg, 0.15 mmol, 0.3 eq.) and **ent-cat-Cl<sub>2</sub>** (= D-Kagans-complex) 18.4 mg, 0.035 mmol, 0.07 eq.) are added and the Schlenk tube is evacuated for 15 min. Afterwards 1 mL of dry THF is added, which results in a red solution. The solution is stirred until the color of the solution has changed from red to green. Then the substrate (0.5 mmol, 1.0 eq.) is added via syringe. The syringe is flushed with 1.5 mL of THF and the reaction mixture is allowed to stir for 48 h at room temperature. Afterwards the reaction mixture is filtered through a silica plug and flushed with Diethylether. The solvent is removed under reduce pressure and the crude product is purified via flash column chromatography (silica, Eluent: CH : MTBE 9:1). The diastereoselectivity and the regioselectivity is determined by <sup>13</sup>C NMR analysis of the crude product.

## 3. Characterization of compounds

### 3.1 Synthesis of $\alpha$ -bromo-epoxides

#### 3.1.1. Synthesis of *syn*-3-bromo-1,2-epoxy-hexane

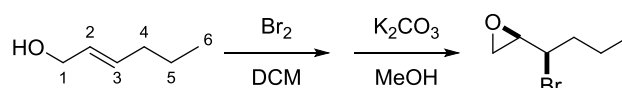

20.0 g of (*E*)-hex-2-en-1-ol (200 mmol, 1.0 eq.) are reacted with 32.0 g of bromine (10.3 mL, 200 mmol, 1.0 eq.) following GP1. After workup, the crude product is reacted with 55.3 g K<sub>2</sub>CO<sub>3</sub> (400 mmol, 2.0 eq.) in MeOH. After distillation (60°C, 10 mbar), 25.8 g (144 mmol, 72%) of *syn*-3-bromo-1,2-epoxyhexane are obtained as a colorless liquid.

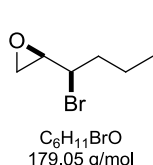

$R_f = 0.40$  (10% Et<sub>2</sub>O in CH), <sup>1</sup>H-NMR (500 MHz, CDCl<sub>3</sub>, RT):  $\delta$  [ppm] = 0.95 (t, 3H,  $J = 7.4$  Hz), 1.36-1.71 (m, 1H), 1.52-1.65 (m, 1H), 1.86 (q, 2H,  $J = 7.5$  Hz), 2.74 (dd, 1H,  $J = 4.8$ ,  $J = 2.5$  Hz), 2.97 (dd, 1H,  $J = 4.8$  Hz,  $J = 3.8$ ), 3.21 (ddd, 1H,  $J = 7.6$  Hz,  $J = 3.8$  Hz,  $J = 2.4$  Hz), 3.65-3.71 (m, 1H). <sup>13</sup>C-NMR (125 MHz, CDCl<sub>3</sub>, RT):  $\delta$  [ppm] = 13.6, 20.8, 37.1, 49.0, 55.8, 55.9. IR  $\tilde{\nu}$  [cm<sup>-1</sup>] = 517, 525, 611, 693, 749, 761, 798, 854, 873, 928, 1193, 1252, 1465, 2933, 2961.

0913a004.19.10.fid  
 AK Gansaeuer  
 Name Weissbarth  
 HW-188p  
 Tag\_\_1H\_Standard CDCl3 E:\ gansaeue 4

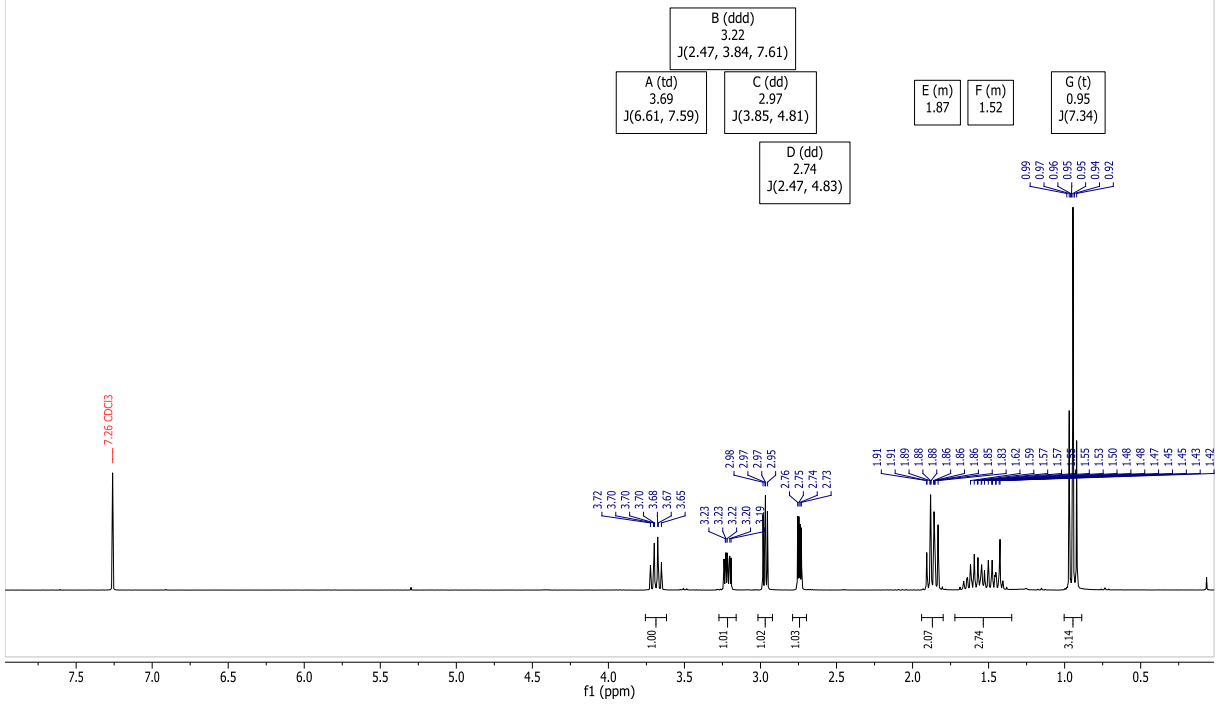

46t4a112.17.11.fid  
 AK Prof. Gansaeuer  
 Name Muehlhaus  
 fxm397\_25mbar  
 Terra Bruker Avance I 400 MHz  
 013\_C\_cpd\_N CDCl3 E:\ gansaeue 112

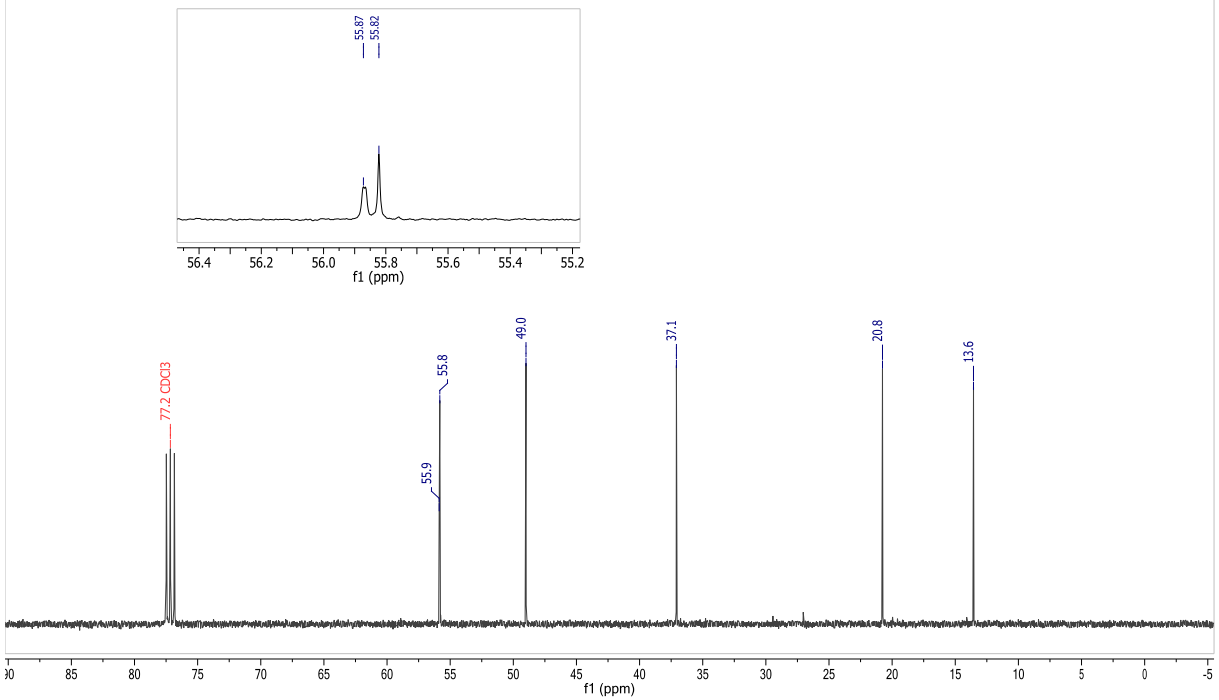

### 3.1.2. Synthesis of *syn*-3-brom-1,2-epoxy-octane.

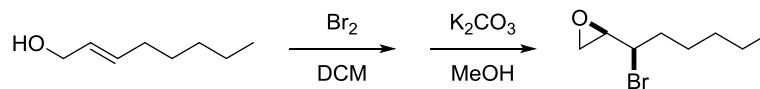

According to GP1: 12.1 g (*E*)-oct-2-en-1-ol (1.00 eq., 120.0 mmol), 19.2 g bromine (1.00 eq., 120.0 mmol, 6.15 mL) are reacted for 30 minutes at -78 °C in DCM. After workup, the crude product is reacted with 33.2 g K<sub>2</sub>CO<sub>3</sub> (2.00 eq., 240 mmol) in MeOH. Flash chromatography (SiO<sub>2</sub>, Eluent: CH<sub>2</sub>Cl<sub>2</sub> : Et<sub>2</sub>O = 99 : 1) afforded 13.8 g (*syn*)-3-bromo-1,2-epoxyoctane 56 % as a light yellow oil.

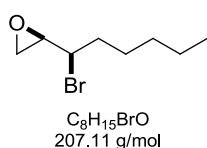

$R_f = 0.50$  (10% Et<sub>2</sub>O in CH<sub>2</sub>Cl<sub>2</sub>), <sup>1</sup>H-NMR (500 MHz, CDCl<sub>3</sub>, RT):  $\delta$  [ppm] = 0.83-0.92 (m, 3H), 1.22-1.35 (m, 4H), 1.36-1.46 (m, 1H), 1.54 (dddd, 1H,  $J = 15.4$ ,  $J = 12.3$  Hz,  $J = 9.3$  Hz,  $J = 4.5$  Hz), 1.80-1.92 (m, 2H), 2.72 (dt, 1H,  $J = 4.2$ ,  $J = 2.0$  Hz), 2.92-2.97 (m, 1H), 3.19 (ddt, 1H,  $J = 7.8$  Hz,  $J = 4.0$  Hz,  $J = 1.9$  Hz), 3.62-3.68 (m, 1H).

<sup>13</sup>C-NMR (125 MHz, CDCl<sub>3</sub>, RT):  $\delta$  [ppm] = 14.0, 22.5, 27.1, 31.2, 35.1, 49.0, 55.8, 62.2. IR  $\tilde{\nu}$  [cm<sup>-1</sup>] = 613, 807, 856, 924, 1227, 1251, 1466, 1740, 2860, 2929, 2957.

51c5a005.17.10.fid  
Instrument Bruker Avance I 500 MHz  
AK Prof. Gansaeuer  
Name Muehlhaus  
fmx410-F1  
001\_H\_Standard CDCl3 E:\gansaeue 5

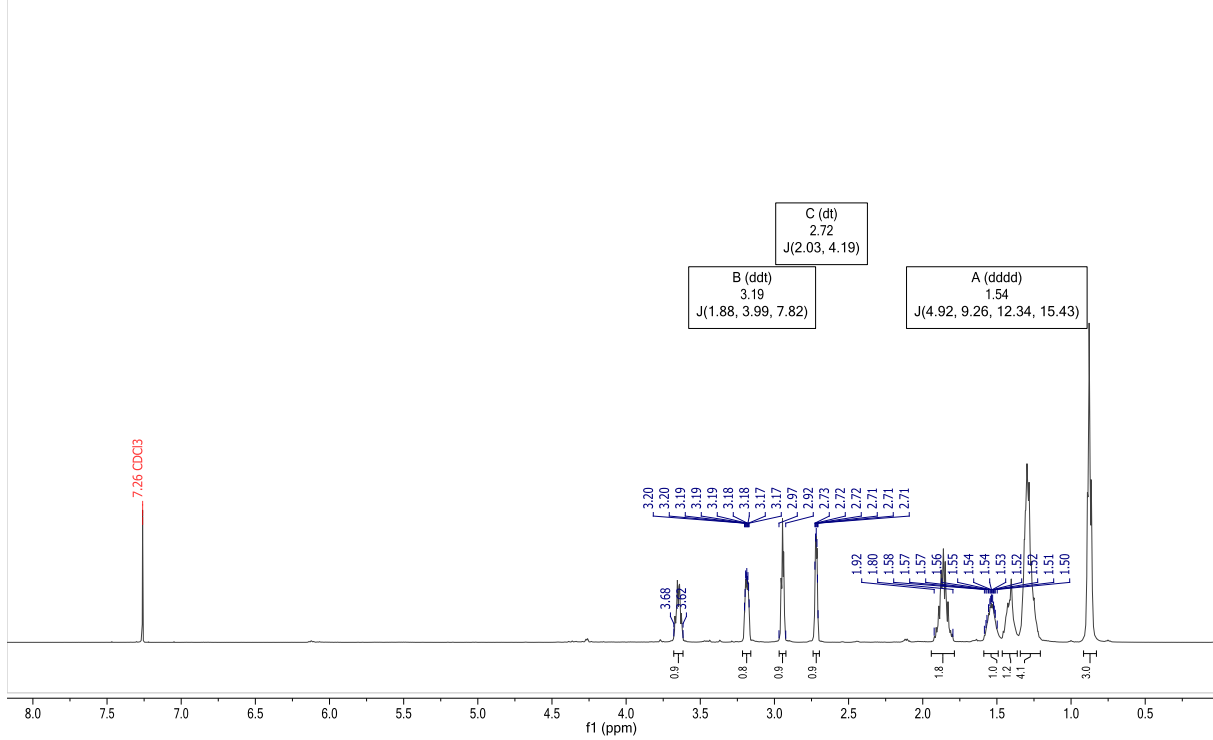

51c5a005.17.11.fid  
Instrument Bruker Avance I 500 MHz  
AK Prof. Gansaeuer  
Name Muehlhaus  
fmx410-F1  
013\_C\_cpd\_N CDCl3 E:\gansaeue 5

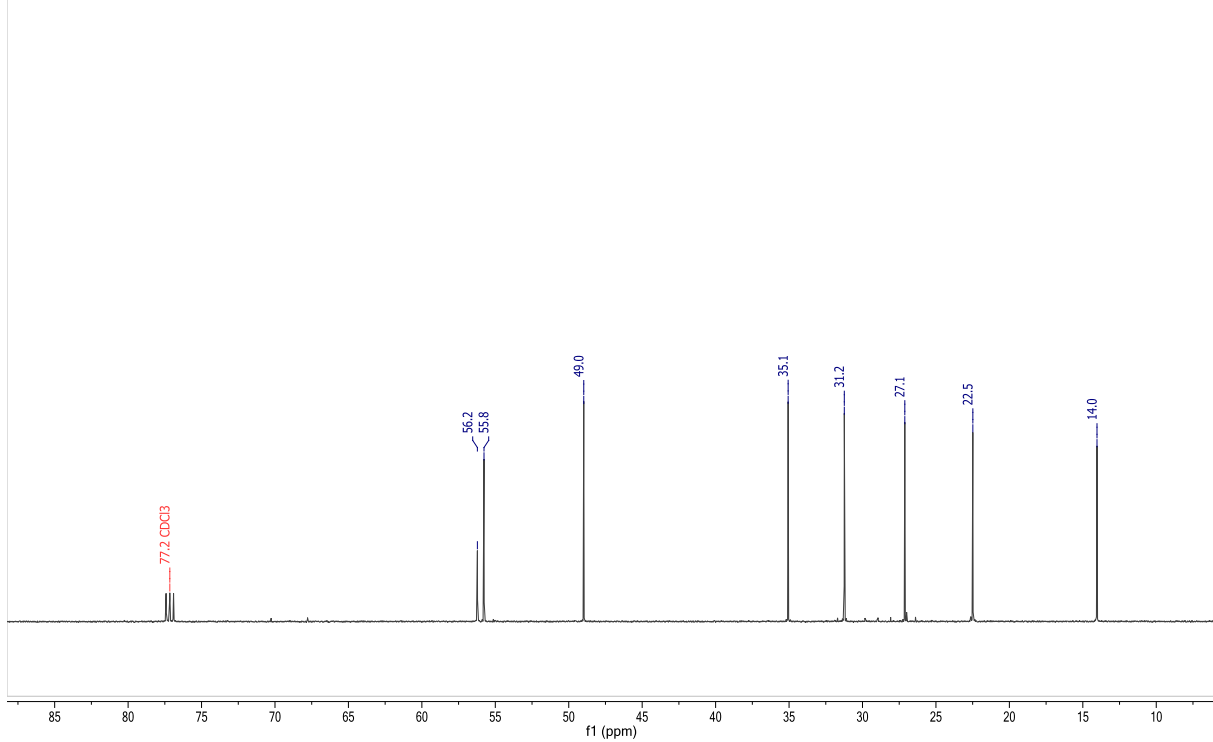



### 3.1.3. Synthesis of *syn*-3-brom-1,2-epoxy-5-methyl-hexane.

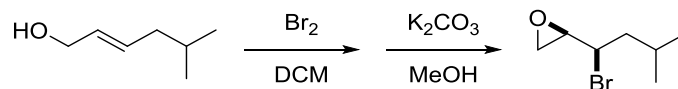

According to GP1: 3.19 g (*E*)-5-methyl-hex-2-en-1-ol (1.00 eq., 31.9 mmol), 5.10 g bromine (1.00 eq., 31.9 mmol, 1.63 mL) are reacted for 30 minutes at -78 °C in DCM. After workup, the crude product is reacted with 8.81 g K<sub>2</sub>CO<sub>3</sub> (2.00 eq., 63.8 mmol) in MeOH. Flash chromatography (SiO<sub>2</sub>, Eluent: CH<sub>2</sub>Cl<sub>2</sub> : Et<sub>2</sub>O = 99 : 1) afforded 4.45 g (*syn*)-3-bromo-1,2-epoxy-5-methyl-hexane 78 % as a light colorless oil.

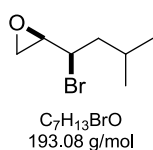

$R_f = 0.40$  (10% Et<sub>2</sub>O in CH<sub>2</sub>Cl<sub>2</sub>), <sup>1</sup>H-NMR (500 MHz, CDCl<sub>3</sub>, RT):  $\delta$  [ppm] = 1.09 (ddd, 6H,  $J = 11.4$  Hz,  $J = 6.7$  Hz,  $J = 1.9$  Hz), 2.05 (hept, 1H,  $J = 6.7$  Hz), 2.73 (dt, 1H,  $J = 4.5$ ,  $J = 2.1$  Hz), 3.01 (ddd, 1H,  $J = 6.0$  Hz,  $J = 4.1$  Hz,  $J = 1.9$  Hz), 3.20 (ddt, 1H,  $J = 8.6$  Hz,  $J = 3.7$  Hz,  $J = 2.3$  Hz), 3.47 (ddd, 1H,  $J = 8.5$  Hz,  $J = 5.4$  Hz,  $J = 1.7$  Hz). <sup>13</sup>C-NMR (125 MHz, CDCl<sub>3</sub>, RT):  $\delta$  [ppm] = 19.9, 20.6, 33.5, 50.1, 54.8, 64.8. IR  $\tilde{\nu}$  [cm<sup>-1</sup>] = 407, 471, 678, 692, 808, 819, 838, 857, 921, 1198, 1255, 1369, 1388, 1465, 2967. HRMS (ESI):  $m/z$  berechnet für C<sub>6</sub>H<sub>11</sub>BrONa<sup>+</sup>: 200.9885 u; found: 200.9877 u.

2013a005.18.10.fid  
AK Gansaeuer  
Name Muehlhaus  
ML-16.1  
Tag\_\_1H\_Standard CDCI3 E:\\gansaeue 5

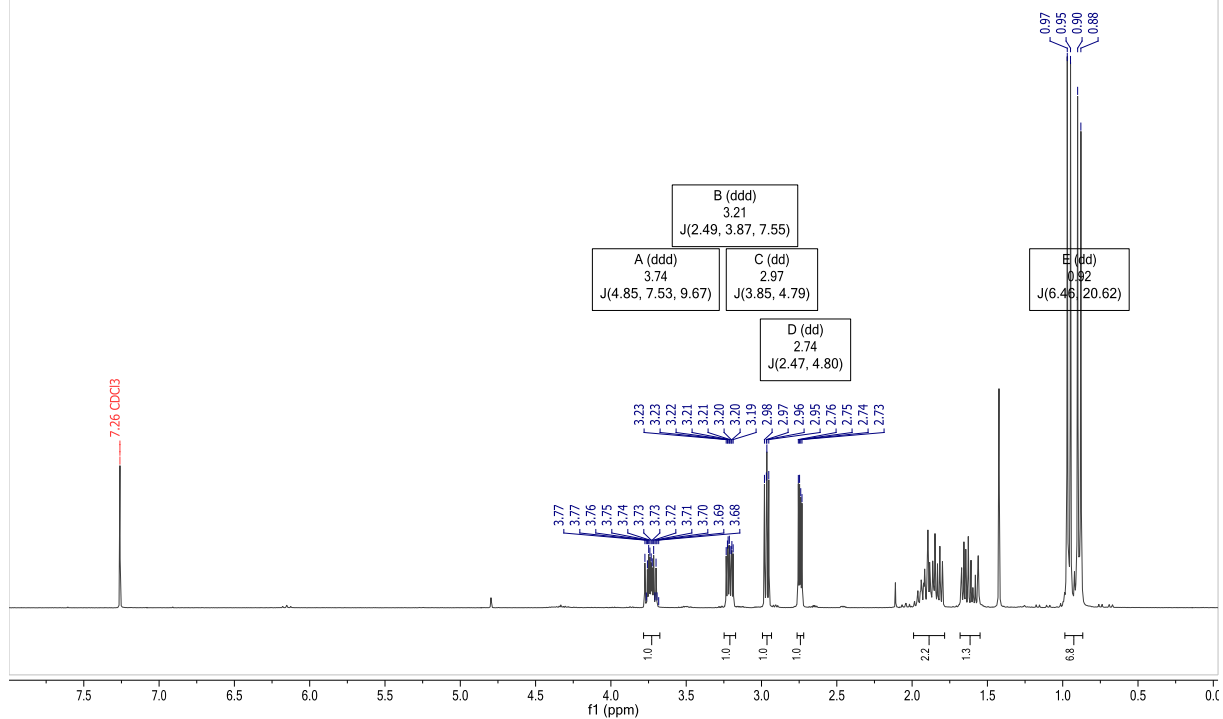

2013c002.18.11.fid  
AK Gansaeuer  
Name Muehlhaus  
ML-17  
Nacht\_13C\_cpds\_1k CDCI3 E:\\gansaeue 2

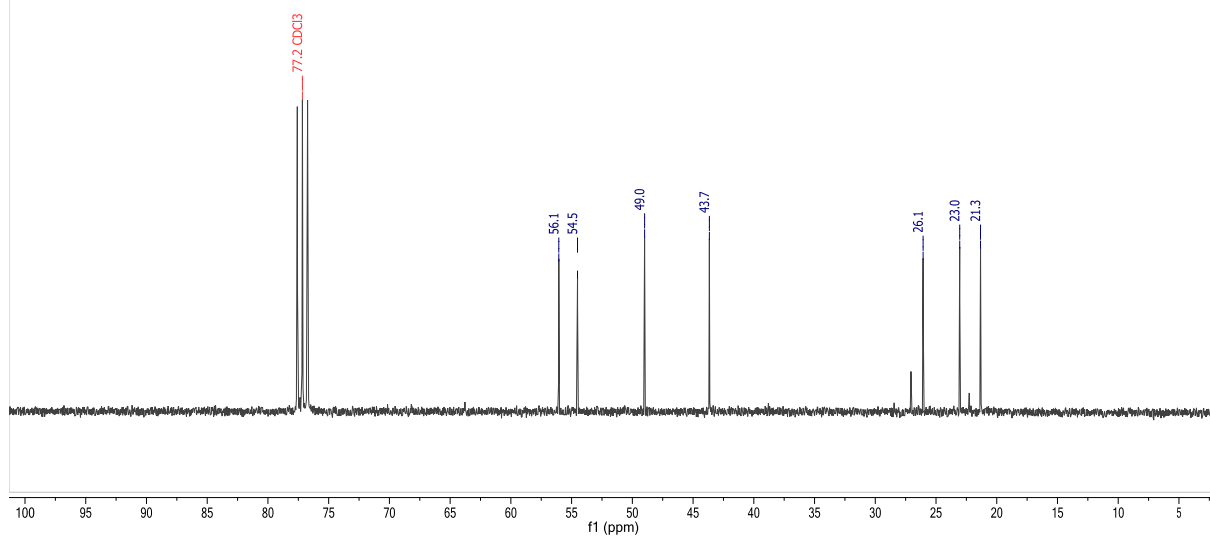

## 3.2 Kinetic resolution of $\alpha$ -bromo-epoxides (*rac*-A→A)

### 3.2.1 Kinetic resolution of *syn*-3-bromo-1,2-epoxy-hexane.

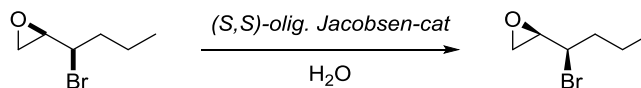

According to GP2 25.8 g of *syn*-3-bromo-1,2-epoxy-hexane (144 mmol, 1.0 eq) are mixed with 10 mg (0.01 mmol, 0.00007 eq.) (*S,S*)-oligomeric Jacobsen catalyst. 1.37 g H<sub>2</sub>O (76.3 mmol, 0.53 eq.) is added dropwise and the mixture is stirred for 16h at room temperature. The crude mixture is purified without further workup by flash column chromatography (SiO<sub>2</sub>, Eluent: CH : MTBE 98:2). 11.0 g (*2R,3R*)-3-bromo-1,2-epoxy-hexane (61.2 mmol, 43% yield) are isolated.

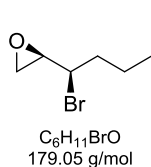

$R_f = 0.40$  (10% Et<sub>2</sub>O in CH), <sup>1</sup>H-NMR (500 MHz, CDCl<sub>3</sub>, RT):  $\delta$  [ppm] = 0.95 (t, 3H,  $J = 7.4$  Hz), 1.36-1.71 (m, 1H), 1.52-1.65 (m, 1H), 1.86 (q, 2H,  $J = 7.5$  Hz), 2.74 (dd, 1H,  $J = 4.8$ ,  $J = 2.5$  Hz), 2.97 (dd, 1H,  $J = 4.8$  Hz,  $J = 3.8$ ), 3.21 (ddd, 1H,  $J = 7.6$  Hz,  $J = 3.8$  Hz,  $J = 2.4$  Hz), 3.65-3.71 (m, 1H). <sup>13</sup>C-NMR (125 MHz, CDCl<sub>3</sub>, RT):  $\delta$  [ppm] = 13.6, 20.8, 37.1, 49.0, 58.8, 55.9. IR  $\tilde{\nu}$  [cm<sup>-1</sup>] = 517, 525, 611, 693, 749, 761, 798, 854, 873, 928, 1193, 1252, 1465, 2933, 2961;  $[\alpha]_D^{20} = -7.9^\circ$  ( $c$  1.0, CHCl<sub>3</sub>); HPLC: DAICEL Chiralpak AS-3; *n*-Heptane/2-Propanol (98:2); flowrate 1.0 mL/min;  $t_R = 6.1$  min (minor, *2S,3S*),  $t_R = 7.1$  min (major, *2R, 3R*); *er* = >99:<1.

### 3.2.2 Kinetic resolution of *syn*-3-bromo-1,2-epoxy-octane.

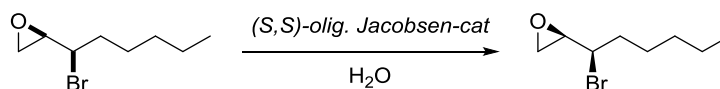

According to GP2 13.6 g of *syn*-3-bromo-1,2-epoxy-octane (65.6 mmol, 1.0 eq) are mixed with 10 mg (0.01 mmol, 0.0002 eq.) (*S,S*)-oligomeric Jacobsen catalyst. 0.65 g H<sub>2</sub>O (36.1 mmol, 0.55 eq.) is added dropwise and the mixture is stirred for 16h at room temperature. The crude mixture is purified without further workup by flash column chromatography (SiO<sub>2</sub>, Eluent: CH:MTBE 98:2). 4.65 g (*2R,3R*)-3-bromo-1,2-epoxy-octane (36.1 mmol, 35% yield) are isolated.

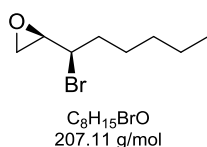

$R_f = 0.50$  (10% Et<sub>2</sub>O in CH), <sup>1</sup>H-NMR (500 MHz, CDCl<sub>3</sub>, RT):  $\delta$  [ppm] = 0.83-0.92 (m, 3H), 1.22-1.35 (m, 4H), 1.36-1.46 (m, 1H), 1.54 (dddd, 1H,  $J = 15.4$ ,  $J = 12.3$  Hz,  $J = 9.3$  Hz,  $J = 4.5$  Hz), 1.80-1.92 (m, 2H), 2.72 (dt, 1H,  $J = 4.2$ ,  $J = 2.0$  Hz), 2.92-2.97

(m, 1H), 3.19 (ddt, 1H,  $J = 7.8$  Hz,  $J = 4.0$  Hz,  $J = 1.9$  Hz), 3.62-3.68 (m, 1H).  $^{13}\text{C-NMR}$  (125 MHz,  $\text{CDCl}_3$ , RT):  $\delta$  [ppm] = 14.0, 22.5, 27.1, 31.2, 35.1, 49.0, 55.8, 62.2. IR  $\tilde{\nu}$  [ $\text{cm}^{-1}$ ] = 613, 807, 856, 924, 1227, 1251, 1466, 1740, 2860, 2929, 2957;  $[\alpha]_{\text{D}}^{20} = -7.6^\circ$  ( $c$  1.0,  $\text{CHCl}_3$ ); HPLC: DAICEL Chiralpak AS-3;  $n$ -Heptane/2-Propanol (98:2); flowrate 1.0 mL/min;  $t_{\text{R}} = 4.9$  min (minor, 2*S*,3*S*),  $t_{\text{R}} = 5.5$  min (major, 2*R*, 3*R*);  $er = >99:<1$ .

### 3.2.3 Kinetic resolution of (*syn*)-3-bromo-1,2-epoxy-5-methyl-hexane.

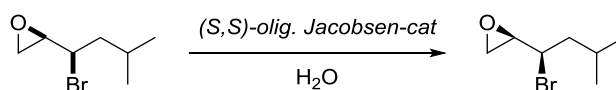

According to GP2 7.54 g of (*syn*)-3-bromo-1,2-epoxy-5-methyl-hexane (39.1 mmol, 1.0 eq) are mixed with 20 mg (0.02 mmol, 0.0004 eq.) (*S,S*)-oligomeric Jacobsen catalyst. 0.373 g  $\text{H}_2\text{O}$  (20.7 mmol, 0.53 eq.) is added dropwise and the mixture is stirred for 16h at room temperature. The crude mixture is purified without further workup by flash column chromatography ( $\text{SiO}_2$ , Eluent:  $\text{CH} : \text{Et}_2\text{O}$  98:2). 2.62 g (2*R*,3*R*)-3-bromo-1,2-epoxy-hexane (13.6 mmol, 35% yield) are isolated.

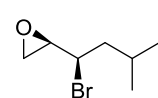  $R_{\text{f}} = 0.40$  (10%  $\text{Et}_2\text{O}$  in  $\text{CH}$ ),  $^1\text{H-NMR}$  (500 MHz,  $\text{CDCl}_3$ , RT):  $\delta$  [ppm] = 1.09 (ddd, 6H,  $J = 11.4$  Hz,  $J = 6.7$  Hz,  $J = 1.9$  Hz), 2.05 (hept, 1H,  $J = 6.7$  Hz), 2.73 (dt, 1H,  $J = 4.5$ ,  $J = 2.1$  Hz), 3.01 (ddd, 1H  $J = 6.0$  Hz,  $J = 4.1$  Hz,  $J = 1.9$  Hz), 3.20 (ddt, 1H,  $J = 8.6$  Hz,  $J = 3.7$  Hz,  $J = 2.3$  Hz), 3.47 (ddd, 1H,  $J = 8.5$  Hz,  $J = 5.4$  Hz,  $J = 1.7$  Hz).  $^{13}\text{C-NMR}$  (125 MHz,  $\text{CDCl}_3$ , RT):  $\delta$  [ppm] = 19.9, 20.6, 33.5, 50.1, 54.8, 64.8. IR  $\tilde{\nu}$  [ $\text{cm}^{-1}$ ] = 407, 471, 678, 692, 808, 819, 838, 857, 921, 1198, 1255, 1369, 1388, 1465, 2967. HRMS (ESI):  $m/z$  calculated for  $\text{C}_7\text{H}_{14}\text{BrO}^+$ : 193.0223 u; found: 193.0227 u.  $[\alpha]_{\text{D}}^{20} = -8.0^\circ$  ( $c$  1.0,  $\text{CHCl}_3$ ); HPLC: DAICEL Chiralpak IC-U;  $n$ -Heptane/2-Propanol (98:2); flowrate 0.85 mL/min;  $t_{\text{R}} = 1.4$  min (minor, 2*S*,3*S*),  $t_{\text{R}} = 1.7$  min (major, 2*R*, 3*R*);  $er = >99:<1$ .

### 3.3 Base mediated aminolysis of bromo-epoxides to aniline-epoxides (A→1)

#### 3.3.1. Synthesis of *N*-(((2*R*,3*S*)-3-pentyloxiran-2-yl)methyl)-*N*-phenylaniline (**1b**).

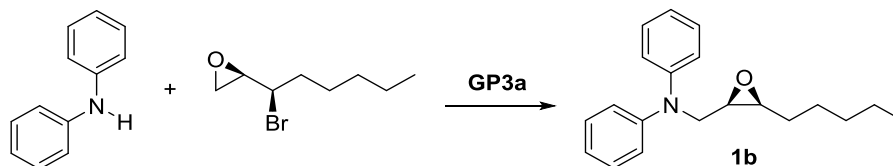

According to GP3a: 1.53 g diphenylamine (1.00 eq., 8.0 mmol), 2.49 g (2*R*,3*R*)-3-bromo-1,2-epoxyoctane (1.50 eq., 12.0 mmol) and 3.52 mL *n*Butyllithium (1.1 eq., 8.8 mmol, 2.5 M in hexane) are reacted for 20 hours (-78 °C to RT) in dry THF. Remaining (2*R*,3*R*)-3-bromo-1,2-epoxyoctane was removed under reduced pressure (5 mbar, 80 °C). Flash chromatography (SiO<sub>2</sub>, Eluent: Ch : Et<sub>2</sub>O = 98 : 2) yielded 1.89 g **1b** 80 % as a colorless liquid.

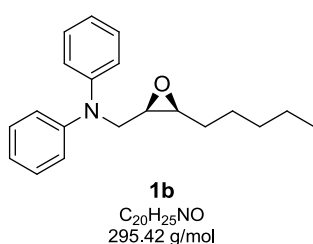

$R_f = 0.8$  (20% Et<sub>2</sub>O in CH), <sup>1</sup>H-NMR (500 MHz, C<sub>6</sub>D<sub>6</sub>, RT):  $\delta$  [ppm] = 0.84 (t, 3H,  $J = 7.1$  Hz), 1.08-1.33 (m, 8H), 2.61 (dt, 1H,  $J = 6.8$  Hz,  $J = 4.3$  Hz), 3.06 (ddd, 1H,  $J = 6.8$  Hz,  $J = 4.3$  Hz,  $J = 4.3$  Hz), 3.64 (dd, 1H,  $J = 15.7$  Hz,  $J = 5.5$  Hz), 3.76 (dd, 1H,  $J = 15.8$  Hz,  $J = 4.3$  Hz), 6.85 (tt, 2H,  $J = 7.3$  Hz,  $J = 1.3$  Hz), 7.06 (dd, 4H,  $J = 8.4$  Hz,  $J = 1.4$  Hz), 7.12 (tt, 4H,  $J = 8.6$  Hz,  $J = 7.1$  Hz). <sup>13</sup>C-NMR (125 MHz, C<sub>6</sub>D<sub>6</sub>, RT):  $\delta$  [ppm] = 14.2, 22.9, 26.7, 28.4, 31.9, 51.5, 54.6, 56.8, 121.7, 122.0, 129.7, 148.5. IR  $\tilde{\nu}$  [cm<sup>-1</sup>] = 513, 593, 607, 692, 730, 746, 1222, 1249, 1362, 1460, 1494, 1589, 2926, 2955. HRMS (ESI):  $m/z$  calculated for C<sub>20</sub>H<sub>26</sub>NO<sup>+</sup>: 296.2009 u, found: 296.2014 u;  $[\alpha]_D^{20} = -80.4^\circ$  (c 1.0, CHCl<sub>3</sub>)

10c5a038.18.10.fid  
 Instrument Bruker Avance I 500 MHz  
 AK Prof. Gansaeuer  
 Name Muehlhaus  
 fxm448\_F2\_90gr  
 001\_H\_N C6D6 E:\ gansaeue 38

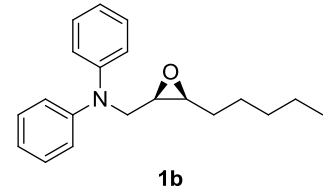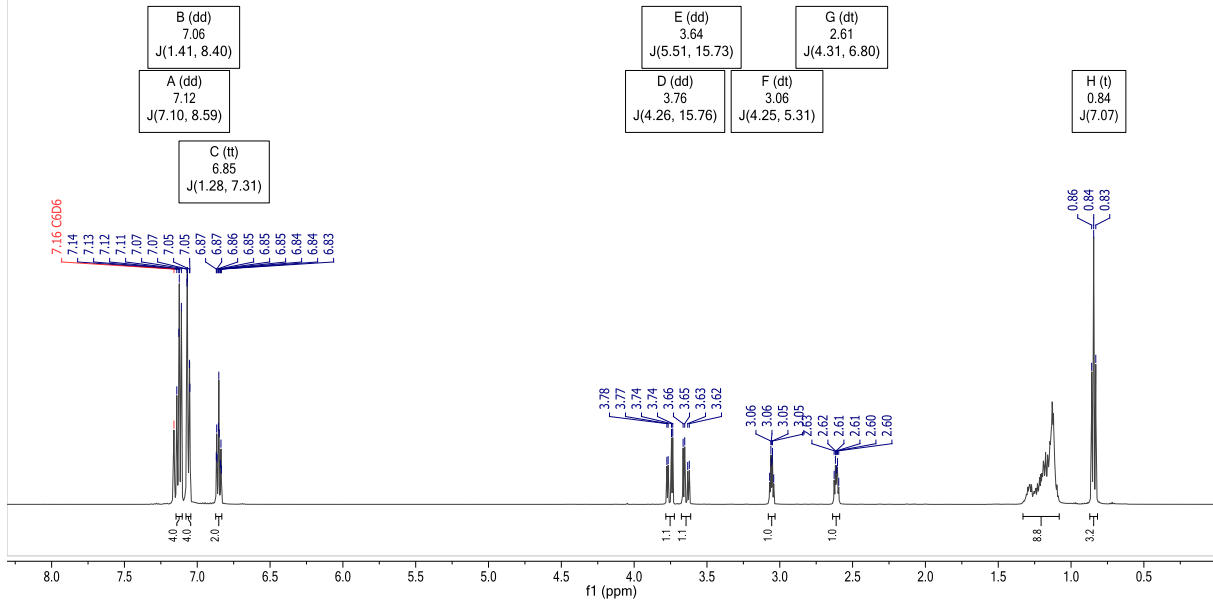

10c5a038.18.11.fid  
 Instrument Bruker Avance I 500 MHz  
 AK Prof. Gansaeuer  
 Name Muehlhaus  
 fxm448\_F2\_90gr  
 013\_C\_cpd C6D6 E:\ gansaeue 38

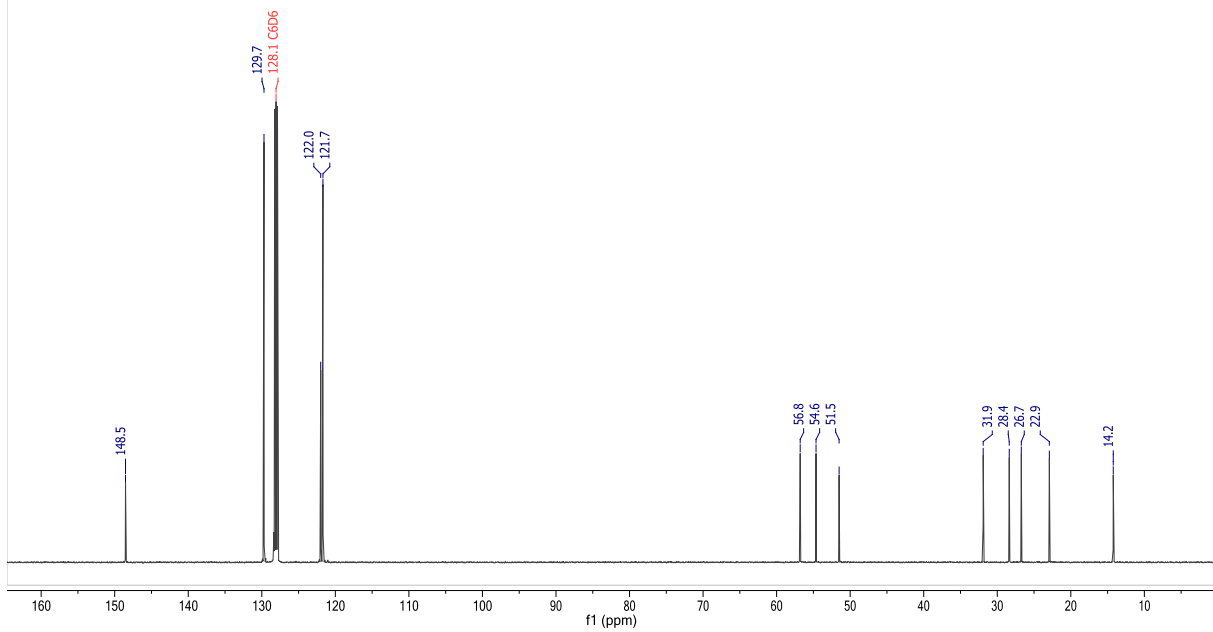

### 3.3.2. Synthesis of *N*-(((2*R*,3*S*)-3-isobutyloxiran-2-yl)methyl)-*N*-phenylaniline (**1c**).

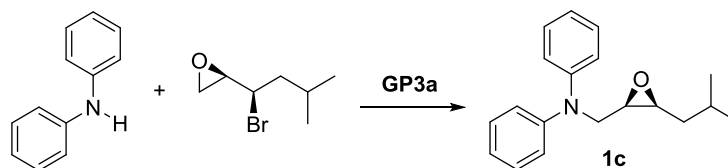

According to GP3a: 846 mg diphenylamine (1.00 eq., 6.0 mmol), 1.16 g (2*R*,3*R*)-3-bromo-1,2-epoxy-5-methyl-hexane (1.20 eq., 6.0 mmol) and 2.2 mL *n*Butyllithium (1.1 eq., 5.5 mmol, 2.5 M in hexane) are reacted for 20 hours (-78 °C to RT) in dry THF. Flash chromatography (SiO<sub>2</sub>, Eluent: CH<sub>2</sub>Cl<sub>2</sub> : Et<sub>2</sub>O = 99 : 1) yielded 693 mg (*N,N*-Diphenyl)(2*R*,3*R*)-3-bromo-5-methyl-hexanamine- **1c** 49 % as a colorless, viscous liquid.

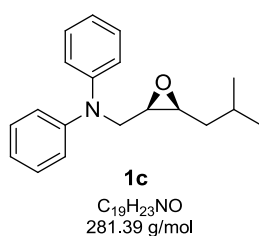

$R_f = 0.8$  (20% Et<sub>2</sub>O in CH<sub>2</sub>Cl<sub>2</sub>), <sup>1</sup>H-NMR (500 MHz, C<sub>6</sub>D<sub>6</sub>, RT):  $\delta$  [ppm] = 0.78 (d, 3H,  $J = 6.7$  Hz), 0.86 (d, 3H,  $J = 6.7$  Hz), 0.98-1.15 (m, 2H), 1.55 (hept, 1H,  $J = 6.7$  Hz), 2.63 (dt, 1H,  $J = 7.1$  Hz,  $J = 4.6$  Hz), 3.03 (ddd, 1H,  $J = 5.8$  Hz,  $J = 4.0$  Hz,  $J = 4.0$  Hz), 3.59 (dd, 1H,  $J = 15.7$  Hz,  $J = 5.8$  Hz), 3.77 (dd, 1H,  $J = 15.7$  Hz,  $J = 3.9$  Hz), 6.85 (tt, 2H,  $J = 7.3$  Hz,  $J = 1.3$  Hz), 7.05-7.14 (m, 8H). <sup>13</sup>C-NMR (125 MHz, C<sub>6</sub>D<sub>6</sub>, RT):  $\delta$  [ppm] = 22.6, 22.8, 27.1, 37.1, 51.8, 54.3, 55.6, 121.7, 122.0, 129.7, 148.6. IR  $\tilde{\nu}$  [cm<sup>-1</sup>] = 513, 608, 692, 729, 746, 1248, 1362, 1463, 1493, 1589, 2955. HRMS (ESI):  $m/z$  calculated for C<sub>19</sub>H<sub>24</sub>NO<sup>+</sup>: 282.1852 u, found: 282.1857 u.  $[\alpha]_D^{20} = -68.0$  (c 1.0, CHCl<sub>3</sub>).

4413a008.18.10.1.1r  
 AK Gansaeuer  
 Name Muehlhaus  
 fxm469\_C2\_F3\_iBu-Sub  
 Nacht\_\_1H\_Standard C6D6 E:\ gansaeue 8

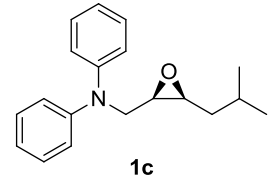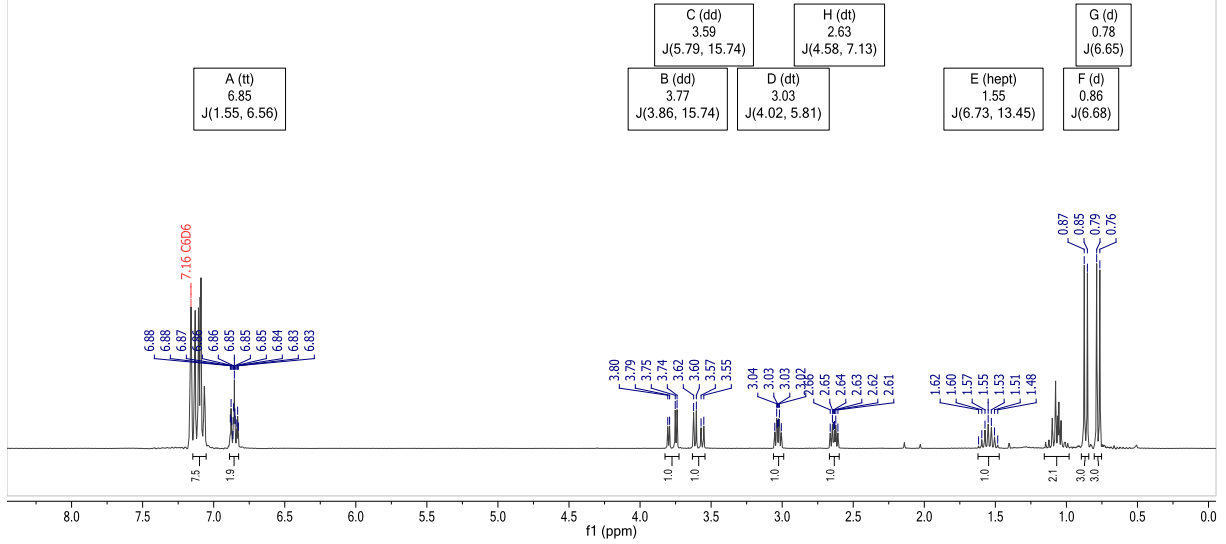

4413a008.18.11.fid  
 AK Gansaeuer  
 Name Muehlhaus  
 fxm469\_C2\_F3\_iBu-Sub  
 Nacht\_13C\_cp\_d\_3k C6D6 E:\ gansaeue 8

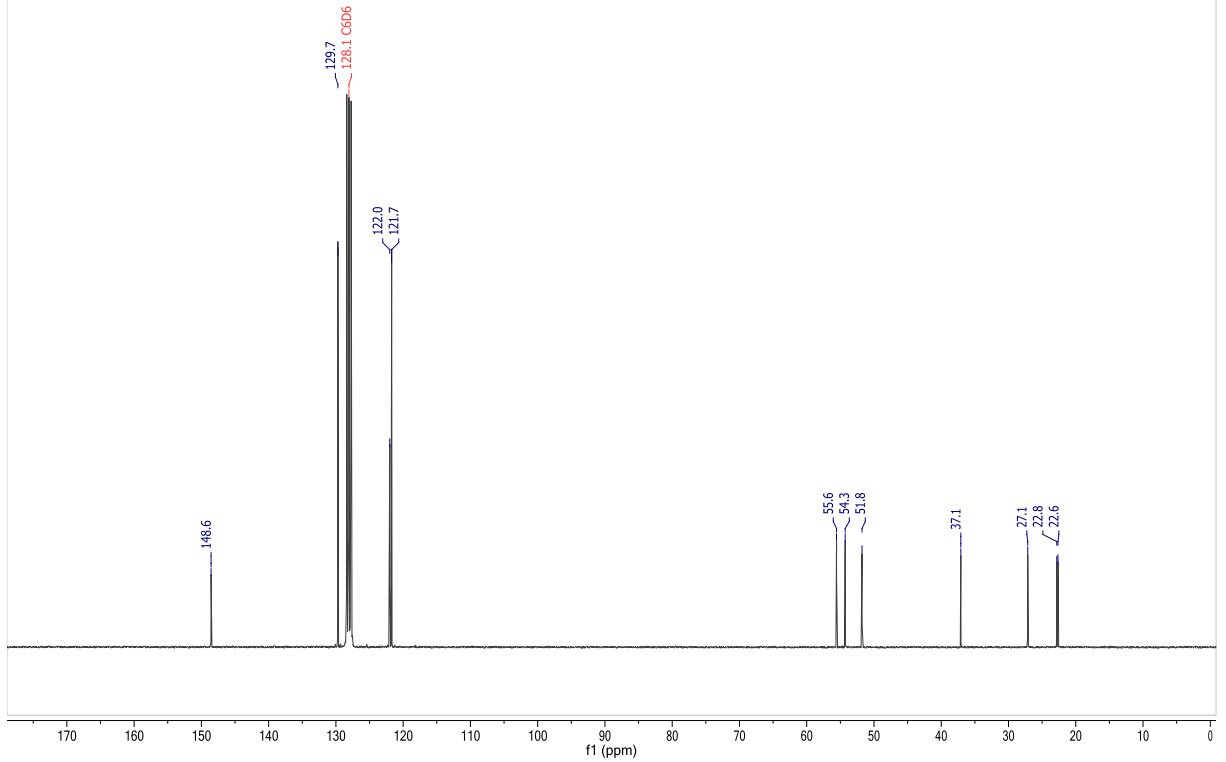



### 3.3.3. Synthesis of *N*-isopropyl-*N*-(((2*R*,3*S*)-3-propyloxiran-2-yl)methyl)aniline (**1e**).

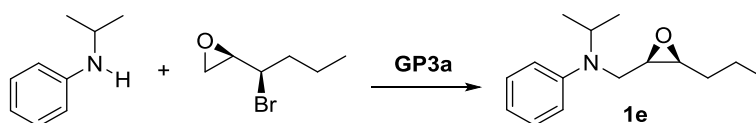

According to GP3a: 1.53 g *N*-isopropylaniline (1.00 eq., 5.0 mmol), 2.49 g (2*R*,3*S*)-3-bromo-1,2-epoxyhexane (1.20 eq., 6.0 mmol) and 2.2 mL *n*Butyllithium (1.1 eq., 5.5 mmol, 2.5 M in hexane) are reacted for 20 hours (-78 °C to RT) in dry THF. Flash chromatography (Al<sub>2</sub>O<sub>3</sub>, Eluent: CH<sub>2</sub>Cl<sub>2</sub> : Et<sub>2</sub>O = 95 : 5) yielded 540 mg **1e** 46% as a colorless liquid.

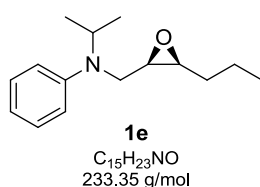

$R_f = 0.35$  (10% Et<sub>2</sub>O in CH<sub>2</sub>Cl<sub>2</sub>), <sup>1</sup>H-NMR (500 MHz, C<sub>6</sub>D<sub>6</sub>, RT):  $\delta$  [ppm] = 0.86 (t, 3H,  $J = 7.2$  Hz), 0.94 (d, 3H,  $J = 6.7$  Hz), 1.04 (d, 3H,  $J = 6.6$  Hz), 1.25-1.45 (m, 4H), 2.65 (ddd, 1H,  $J = 6.5$  Hz,  $J = 5.4$  Hz,  $J = 4.1$  Hz), 2.86 (ddd, 1H,  $J = 5.0$  Hz,  $J = 4.1$  Hz,  $J = 3.1$  Hz), 3.07 (dd, 1H,  $J = 16.1$  Hz,  $J = 5.1$  Hz), 3.33 (dd, 1H,  $J = 16.1$  Hz,  $J = 3.1$  Hz), 3.84 (hept, 1H,  $J = 6.6$  Hz), 6.80 (tt, 1H,  $J = 7.3$  Hz,  $J = 1.0$  Hz), 6.88 (dd, 2H,  $J = 8.9$  Hz,  $J = 1.0$  Hz), 7.26 (dd, 2H,  $J = 8.9$  Hz,  $J = 7.2$  Hz). <sup>13</sup>C-NMR (125 MHz, C<sub>6</sub>D<sub>6</sub>, RT):  $\delta$  [ppm] = 14.1, 19.9, 20.4, 20.6, 30.7, 43.5, 48.5, 56.6, 56.7, 114.3, 117.5, 129.7, 149.5. IR  $\tilde{\nu}$  [cm<sup>-1</sup>] = 475, 491, 745, 827, 988, 1041, 1104, 1122, 1159, 1159, 1248, 1297, 1350, 1364, 1392, 1464, 1504, 1598, 2963. HRMS (ESI):  $m/z$  calculated for C<sub>15</sub>H<sub>24</sub>NO<sup>+</sup>: 234.1852 u, found: 234.1852 u;  $[\alpha]_D^{20} = -18.3^\circ$  (c 1.0, CHCl<sub>3</sub>)

06t4a085.18.10.fid  
 AK Prof. Gansaeuer  
 Name Muehlhaus  
 fxm433-c3\_F1  
 Terra Bruker Avance I 400 MHz  
 001\_H\_Standard C6D6 E:\ gansaeue 85

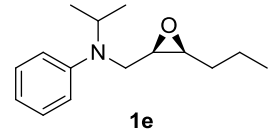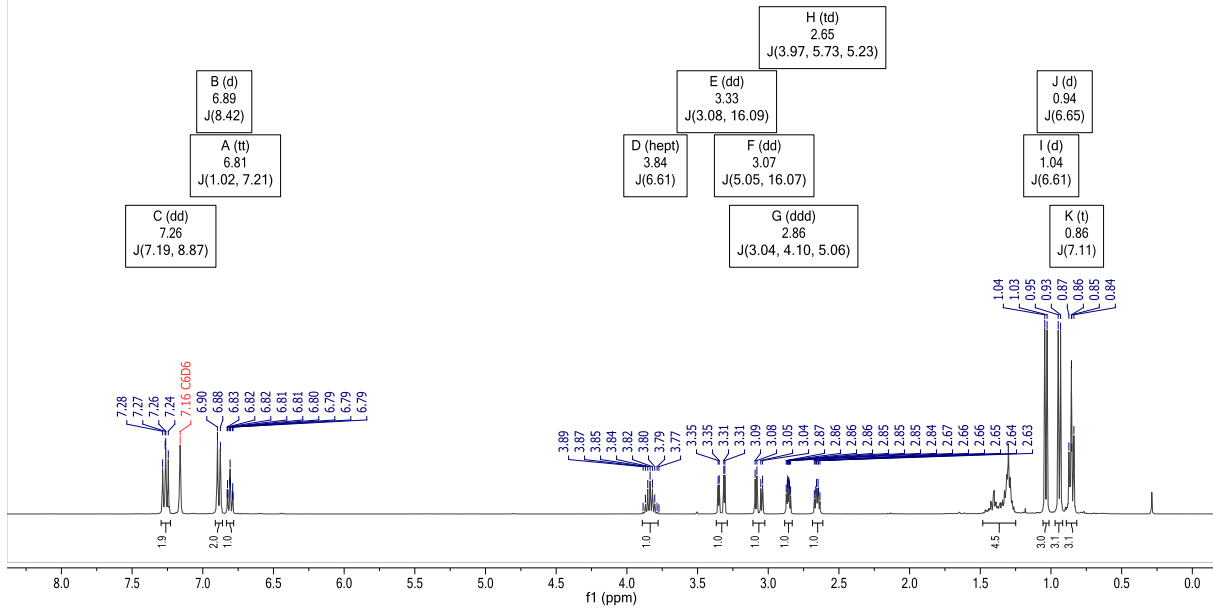

06t4a085.18.11.fid  
 AK Prof. Gansaeuer  
 Name Muehlhaus  
 fxm433-c3\_F1  
 Terra Bruker Avance I 400 MHz  
 013\_C\_cpd\_N C6D6 E:\ gansaeue 85

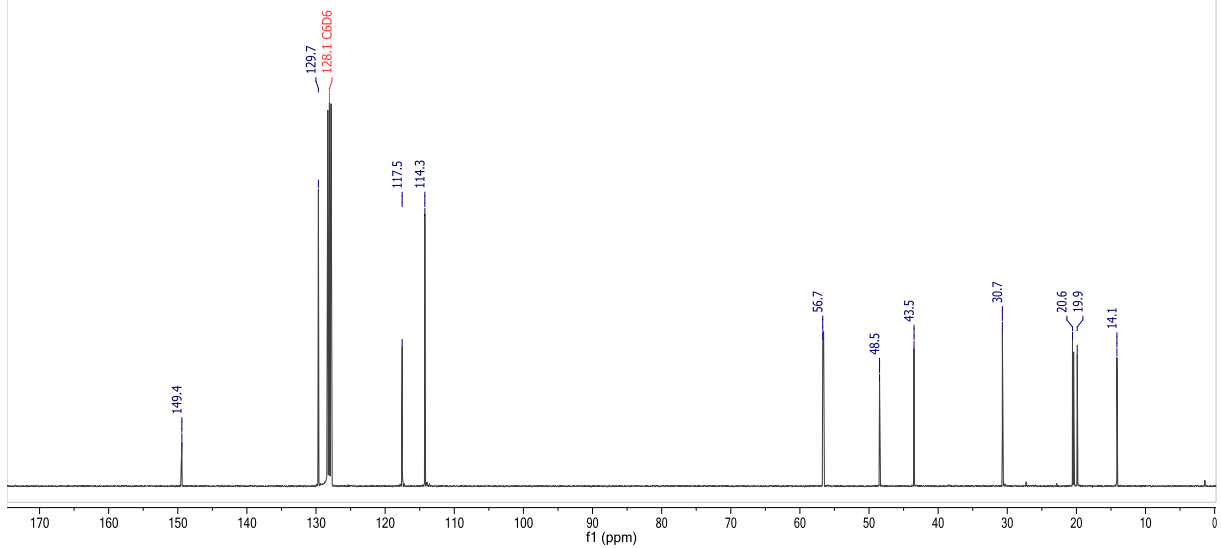

### 3.3.4 Synthesis of *N*-Cyclopropyl-*N*-(((2*R*,3*S*)-3-propyloxirane-2-yl)methyl)aniline (**1f**).

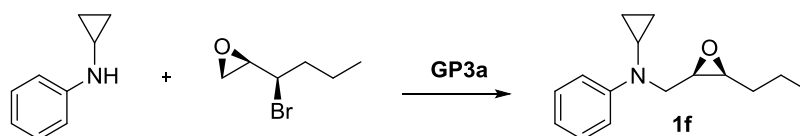

1.04 g (7.8 mmol, 1.0 eq.) of *N*-cyclopropylaniline are reacted with 3.4 mL of 2.5M *n*BuLi-solution in Hexane (8.6 mmol, 1.1 eq.) and 1.95 g (2*R*,3*R*)-3-bromo-1,2-epoxyhexane (10.9 mmol, 1.2 eq.) following GP3a. After flash column chromatography (SiO<sub>2</sub>, CH : MTBE 98:2) the product is obtained as a colorless oil in 63% yield (1.14 g, 5.5 mmol) and is stored under argon atmosphere.

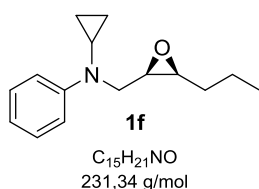

$R_f = 0.7$  (20% EE in CH); <sup>1</sup>H NMR (300.1 MHz, C<sub>6</sub>D<sub>6</sub>, RT)  $\delta$  [ppm] 0.42-0.60 (m, 4H), 0.81-0.89 (m, 3H), 1.22-1.48 (m, 4H), 2.28 (tt,  $J = 6.2$  Hz,  $J = 4.0$  Hz, 1H), 2.56-2.65 (m, 1H), 2.89 (dt,  $J = 5.8$  Hz,  $J = 4.2$  Hz, 1H), 3.30 (dd,  $J = 15.5$  Hz,  $J = 5.6$  Hz, 1H), 3.43 (dd,  $J = 15.5$  Hz,  $J = 4.2$  Hz, 1H), 6.86 (tt,  $J = 7.2$  Hz,  $J = 1.1$  Hz, 1H), 7.06-7.13 (m, 2H), 7.23-7.33 (m, 2H); <sup>13</sup>C NMR (75 MHz, C<sub>6</sub>D<sub>6</sub>, RT)  $\delta$  [ppm] = 9.6, 9.6, 14.1, 20.5, 30.5, 32.6, 51.3, 54.8, 56.3, 115.1, 118.5, 129.3, 150.2; IR  $\nu_{\max}$  (neat)[cm<sup>-1</sup>] = 691, 719, 748, 824, 1024, 1231, 1300, 1338, 1366, 1452, 1498, 1598, 2958; HRMS (ESI)  $m/z$  calculated for [M+H]<sup>+</sup> 232.1696 u found 232.1697 u;  $\alpha_D^{20}$ (CHCl<sub>3</sub>) = -18.2°.

3013b009.18.10.1hd  
 AK Gansaeuer  
 Name Weissbarth  
 HW-146pure  
 Tag\_\_1H\_Standard C6D6 E:\\ gansaeue 9

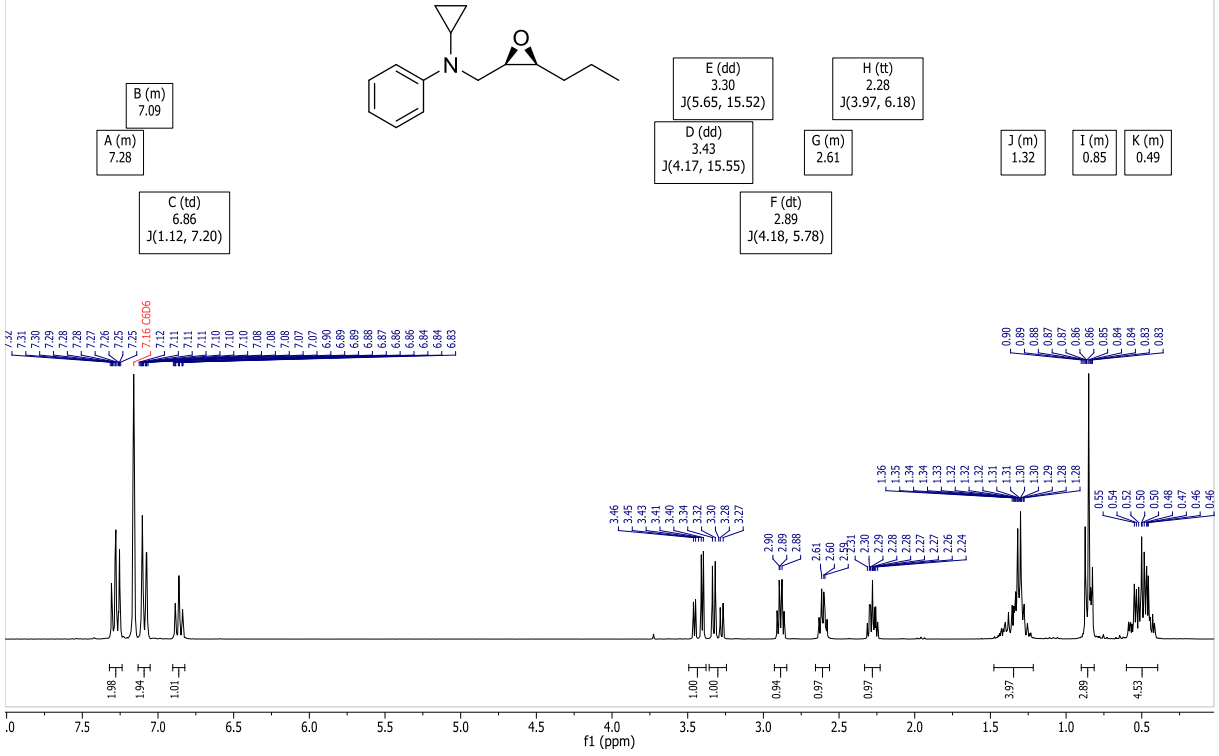

3013b009.18.12.1.1r  
 AK Gansaeuer  
 Name Weissbarth  
 HW-146pure  
 Nacht\_13C\_cpd\_3k C6D6 E:\\ gansaeue 9

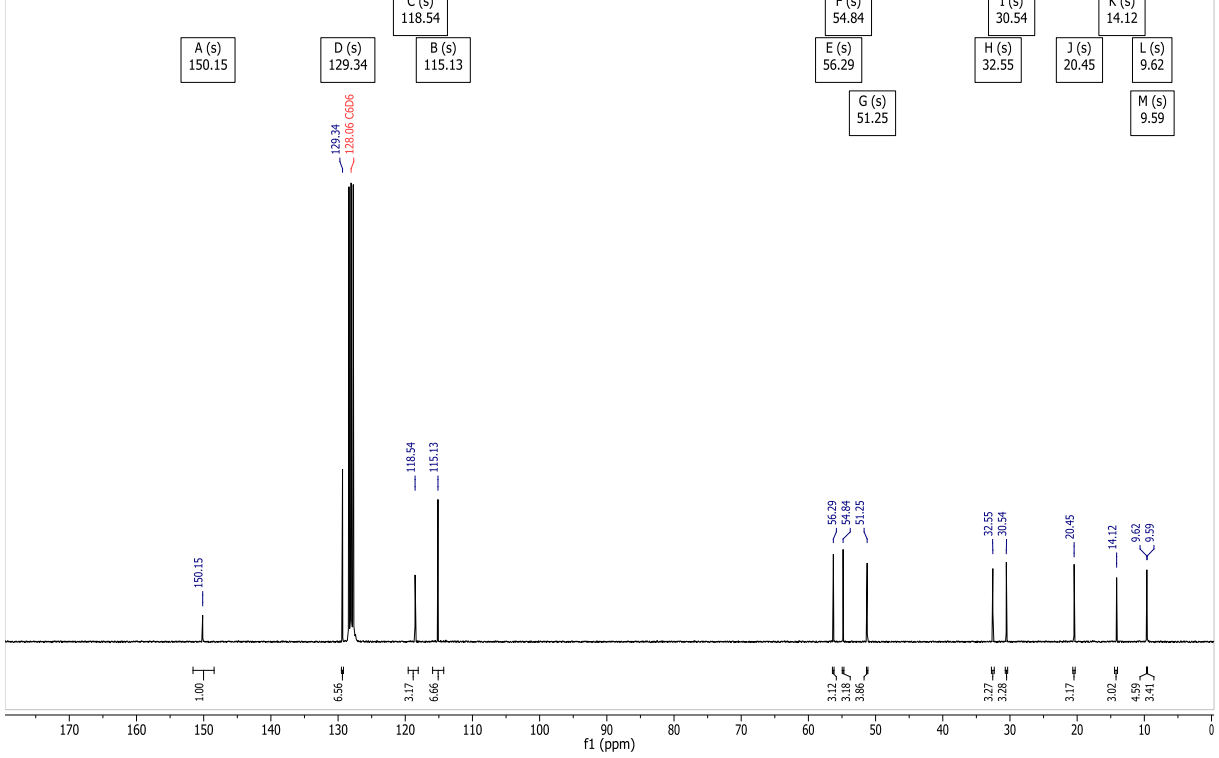

### 3.3.5 Synthesis of 4-chloro-*N*-cyclohexyl-*N*-(((2*R*,3*S*)-3-propyloxirane-2-yl)methyl)aniline (**1h**).

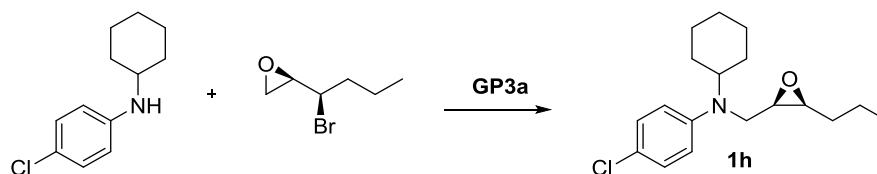

1.01 g (4.8 mmol, 1.0 eq.) of 4-Chloro-*N*-cyclohexylaniline are reacted with 3.6 mL of 1.6M *n*BuLi-solution in Hexane (5.8 mmol, 1.2 eq.) and 1.04 g (2*R*,3*R*)-3-bromo-1,2-epoxyhexane (5.8 mmol, 1.2 eq.) following GP3a. After flash column chromatography (Al<sub>2</sub>O<sub>3</sub>, CH : MTBE 98:2) the product is obtained as a colorless oil in 53% yield (786 mg, 2.55 mmol) and is stored under argon atmosphere.

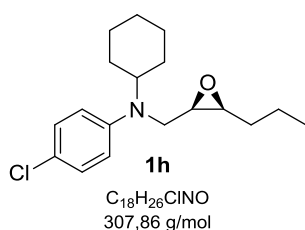

**R<sub>f</sub>** = 0.7 (20% EE in CH); **<sup>1</sup>H NMR (500.1 MHz, C<sub>6</sub>D<sub>6</sub>, RT) δ [ppm]** = 0.84-0.97 (m, 4H), 1.04-1.51 (m, 9H), 1.56-1.64 (m, 3H), 1.70-1.77 (m, 1H), 2.66 (ddd, *J* = 6.7 Hz, *J* = 5.1 Hz, *J* = 4.1 Hz, 1H), 2.75 (ddd, *J* = 5.3 Hz, *J* = 4.1 Hz, *J* = 2.9 Hz, 1H), 3.01 (dd, *J* = 16.2 Hz, *J* = 5.3 Hz, 1H), 3.26-3.33 (m, 2H), 6.66-6.71 (m, 2H), 7.20-7.25 (m, 2H); **<sup>13</sup>C NMR (125.5 MHz, C<sub>6</sub>D<sub>6</sub>, RT) δ [ppm]** = 14.1, 20.6, 26.1, 26.2, 26.4, 30.6, 30.7, 31.4, 44.5, 56.5, 56.6, 57.8, 115.2, 122.1, 129.5, 147.9; **IR ν<sub>max</sub> (neat)[cm<sup>-1</sup>]** = 511, 669, 770, 806, 1006, 1100, 1147, 1172, 1234, 1283, 1450, 1496, 1593, 2855, 2930; **HRMS (ESI) m/z** calculated for [M+H]<sup>+</sup> 308.1776 u found 308.1773 u; **α<sub>D</sub><sup>20</sup>(CHCl<sub>3</sub>)** = -23.8°

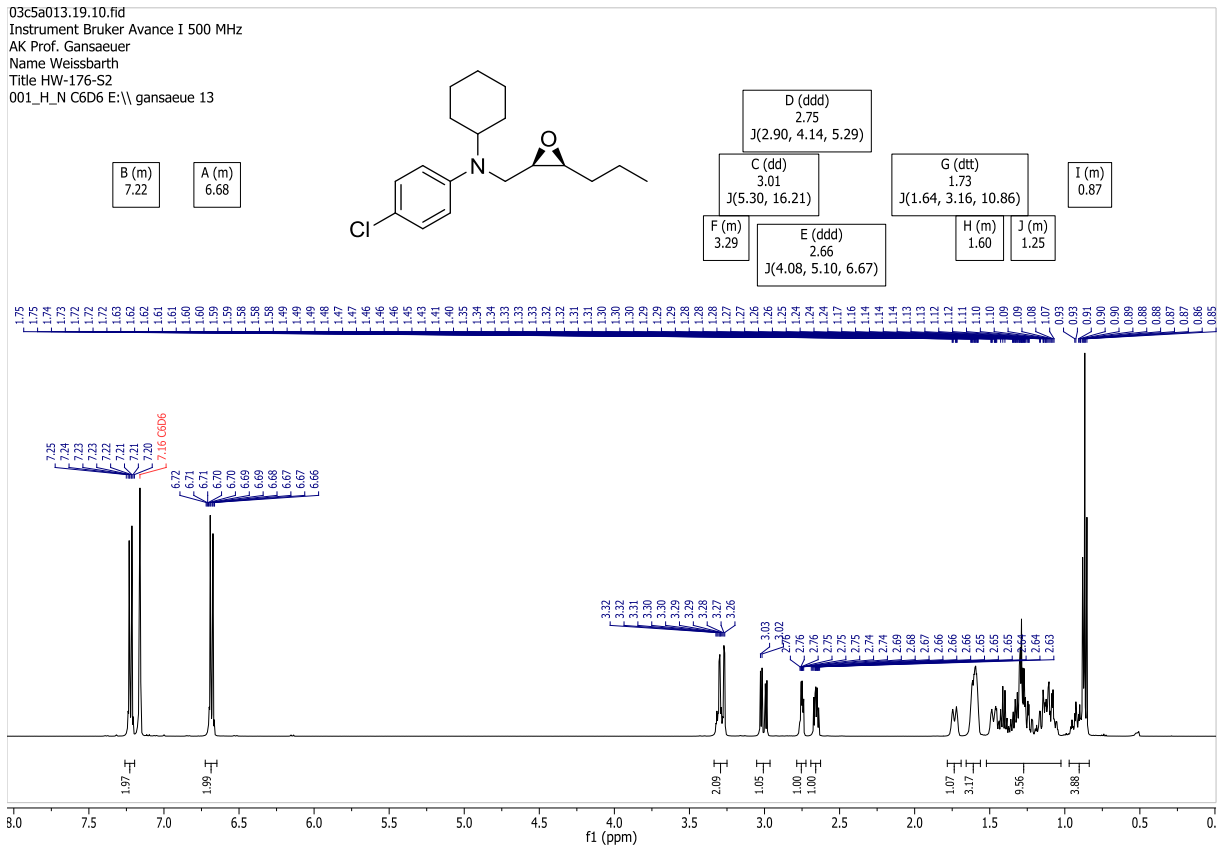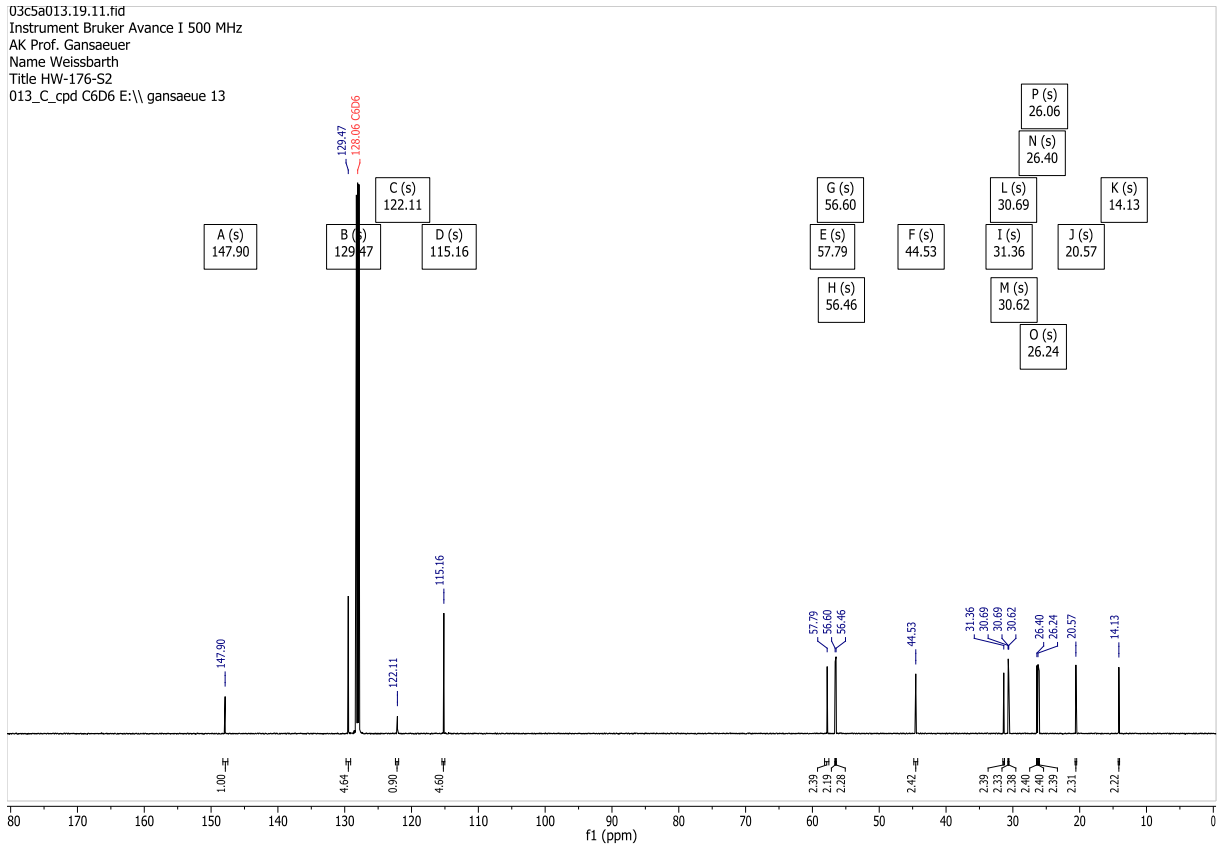

### 3.3.6 Synthesis of 4-chloro-*N*-cyclopentyl-*N*-(((2*R*,3*S*)-3-propyloxirane-2-yl)methyl)aniline (**1i**).

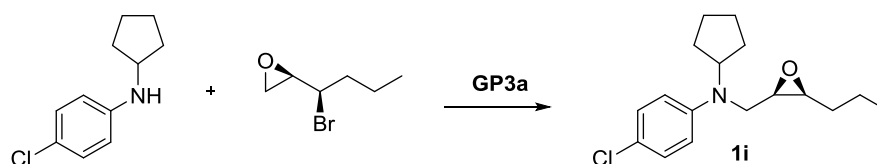

913 mg (4.7 mmol, 1.0 eq.) of 4-Chloro-*N*-cyclopentylaniline are reacted with 3.5 mL of 1.6M *n*BuLi-solution in Hexane (5.6 mmol, 1.2 eq.) and 1.00 g (2*R*,3*R*)-3-bromo-1,2-epoxyhexane (5.6 mmol, 1.2 eq.) following GP3a. After flash column chromatography (Al<sub>2</sub>O<sub>3</sub>, CH : MTBE 98:2) the product is obtained as a colorless oil in 40% yield (549 mg, 1.9 mmol) and is stored under argon atmosphere.

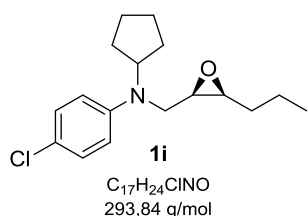

**R<sub>f</sub>** = 0.7 (20% EE in CH); **<sup>1</sup>H NMR (400.1 MHz, C<sub>6</sub>D<sub>6</sub>, RT) δ [ppm]** = 0.85 (t, *J* = 7.2 Hz, 3H), 1.20-1.54 (m, 10H), 1.57-1.67 (m, 1H), 1.68-1.78 (m, 1H), 2.64 (td, *J* = 5.9 Hz, *J* = 4.1 Hz, 1H), 2.77 (ddd, *J* = 5.5 Hz, *J* = 4.1 Hz, *J* = 2.9 Hz, 1H), 2.96 (dd, *J* = 16.0 Hz, *J* = 5.5 Hz, 1H), 3.23 (dd, *J* = 16.0 Hz, *J* = 2.9 Hz, 1H), 3.66-3.76 (m, 1H), 6.64-6.70 (m, 2H), 7.17-7.22 (m, 2H); **<sup>13</sup>C NMR (101 MHz, C<sub>6</sub>D<sub>6</sub>, RT) δ [ppm]** = 14.1, 20.5, 23.9, 24.0, 29.6, 30.1, 30.6, 46.4, 56.2, 56.5, 60.3, 116.6, 122.8, 129.3, 149.0; **IR ν<sub>max</sub> (neat)[cm<sup>-1</sup>]** = 511, 807, 976, 1098, 1188, 1244, 1277, 1350, 1397, 1455, 1495, 1594, 2870, 2957; **HRMS (ESI) m/z** calculated for [M+H]<sup>+</sup> 294.1619 u found 294.1616 u; **α<sub>D</sub><sup>20</sup>(CHCl<sub>3</sub>)** = -38.9°.

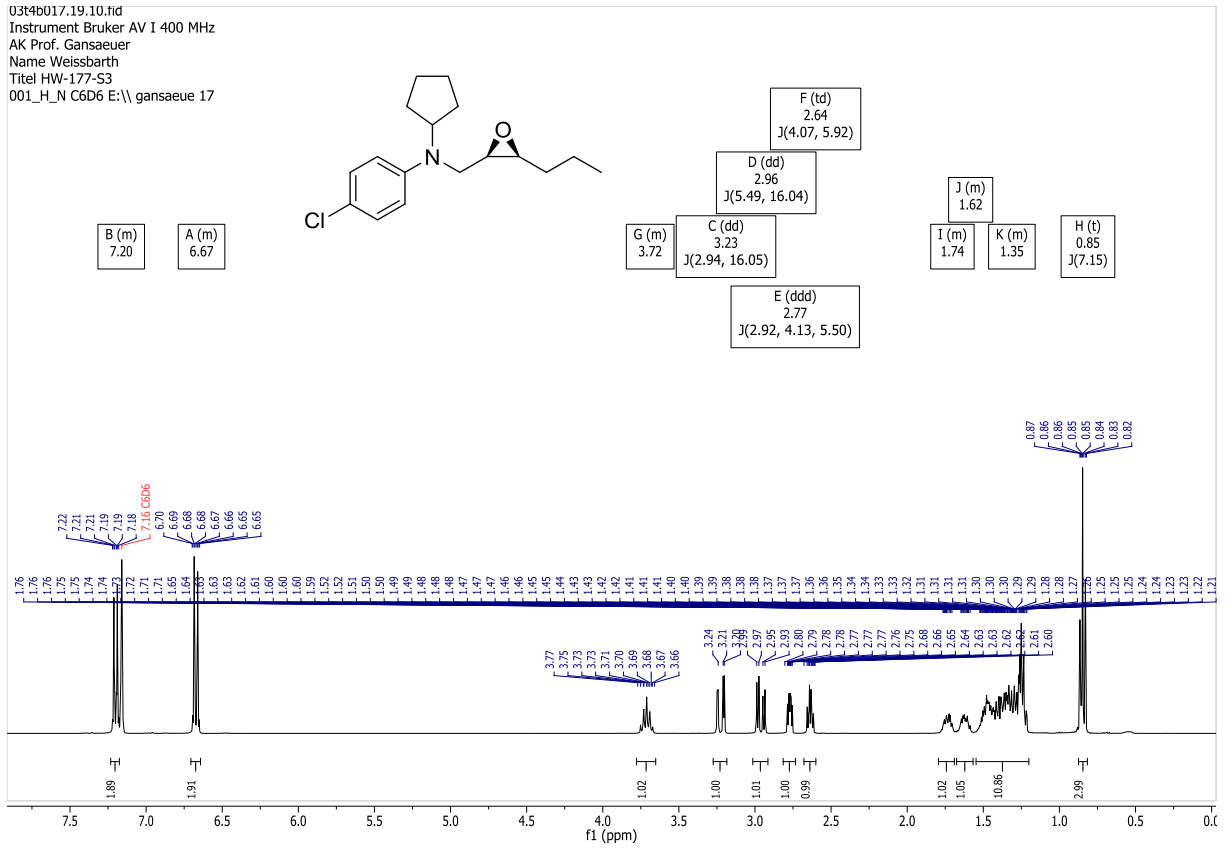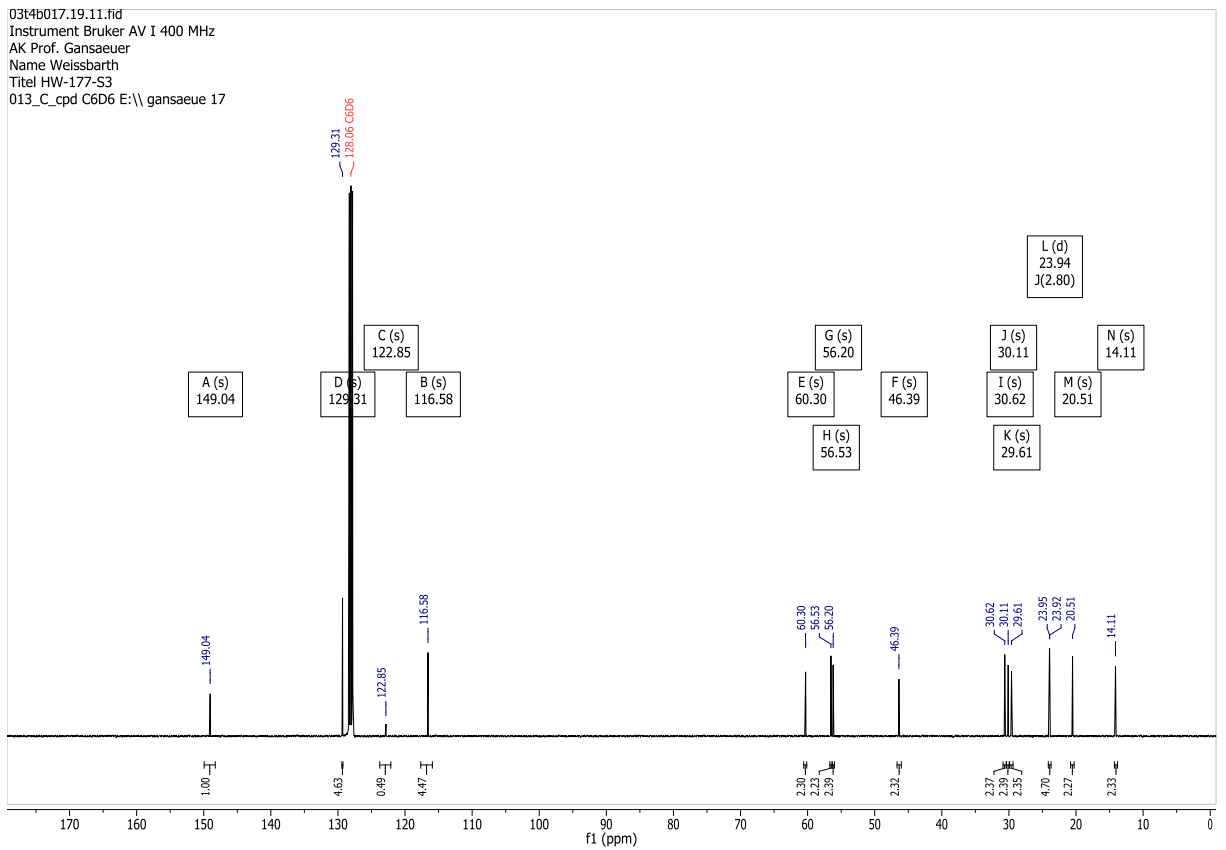



### 3.3.7 Synthesis of 4-chloro-*N*-isopropyl-*N*-(((2*R*,3*S*)-3-propyloxiran-2-yl)methyl)aniline (1j).

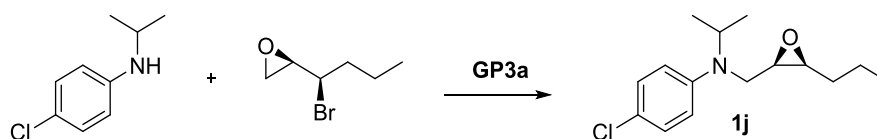

848.3 mg (5 mmol, 1.0 eq.) of 4-chloro-*N*-isopropylaniline are reacted with 2.4 mL of 2.5M *n*BuLi-solution in Hexane (6 mmol, 1.2 eq.) and 1.07 g (2*R*,3*R*)-3-bromo-1,2-epoxyhexane (6 mmol, 1.2 eq.) following GP3a. After flash column chromatography (Al<sub>2</sub>O<sub>3</sub>, CH : MTBE 98:2) the product is obtained as a colorless oil in 30% yield (386 mg, 1.55 mmol) and is stored under argon atmosphere.

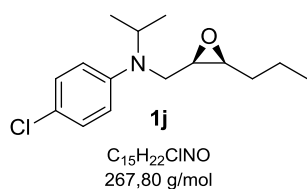

R<sub>f</sub> = 0.7 (20% EE in CH); <sup>1</sup>H NMR (400.1 MHz, C<sub>6</sub>D<sub>6</sub>, RT) δ [ppm] = 0.84-0.88 (m, 6H), 0.94 (d, *J* = 6.6 Hz, 3H), 1.22-1.46 (m, 4H), 2.63 (ddd, *J* = 6.6 Hz, *J* = 5.4 Hz, *J* = 4.1 Hz, 1H), 2.72 (ddd, *J* = 5.4 Hz, *J* = 4.1 Hz, *J* = 2.9 Hz, 1H), 2.91 (dd, *J* = 16.2 Hz, *J* = 5.4 Hz, 1H), 3.20 (dd, *J* = 16.2 Hz, *J* = 2.9 Hz, 1H), 3.61 (hept, *J* = 6.6 Hz, 1H), 6.58-6.22 (m, 2H) 7.18-7.22 (m, 2H); <sup>13</sup>C NMR (125.5 MHz, C<sub>6</sub>D<sub>6</sub>, RT) δ [ppm] = 14.1, 19.6, 20.3, 20.5, 30.6, 43.5, 48.6, 56.2, 56.6, 115.2, 122.2, 129.5, 147.9; IR ν<sub>max</sub> (neat)[cm<sup>-1</sup>] = 510, 753, 807, 1101, 1161, 1188, 1246, 1283, 1393, 1465, 1496, 1596, 2963; HRMS (ESI) *m/z* calculated for [M+H]<sup>+</sup> 268.1463 u found 268.1462 u; α<sub>D</sub><sup>20</sup>(CHCl<sub>3</sub>) = -27.0°.

43p5a029.18.10.hd  
 Pollux Bruker AV III 500 MHz Prodigy  
 AK Prof. Gansaeuer  
 Name Weissbarth  
 HW-161-S6-F3  
 001\_H\_N C6D6 E:\\ Gansaeue 29

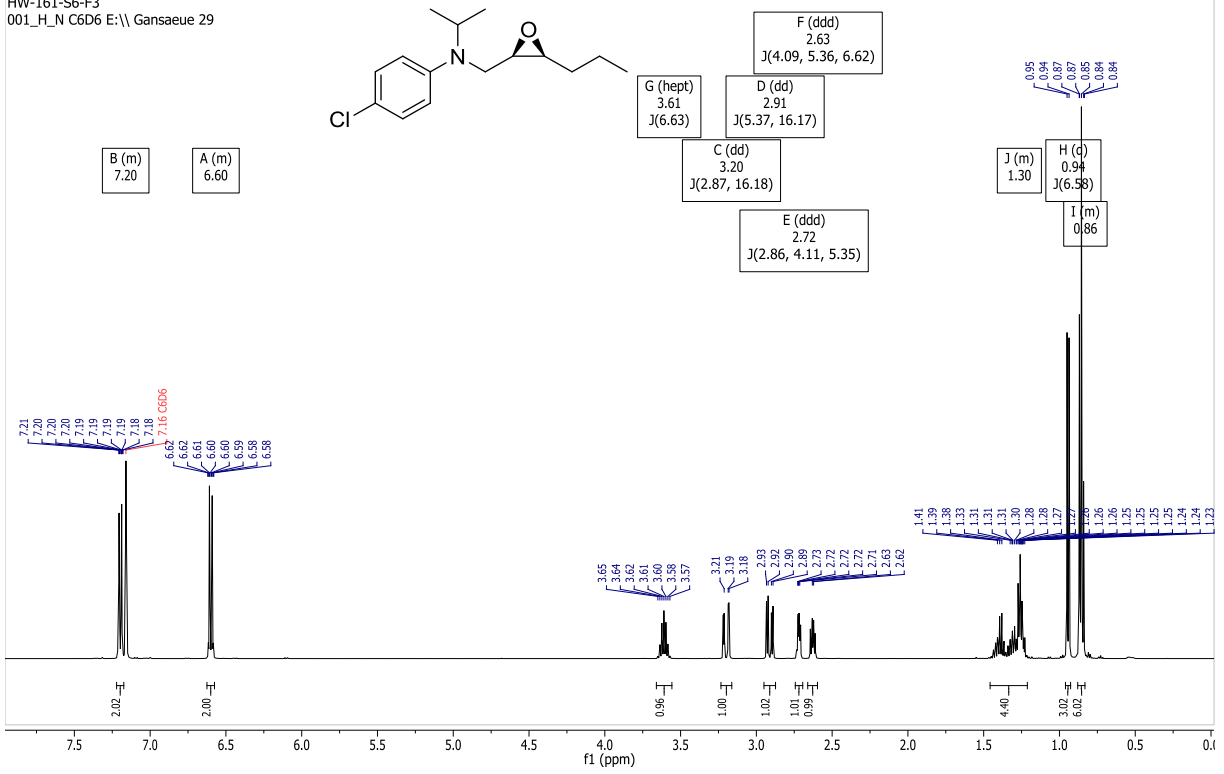

43p5a029.18.11.fid  
 Pollux Bruker AV III 500 MHz Prodigy  
 AK Prof. Gansaeuer  
 Name Weissbarth  
 HW-161-S6-F3  
 013\_C\_cpd\_N C6D6 E:\\ Gansaeue 29

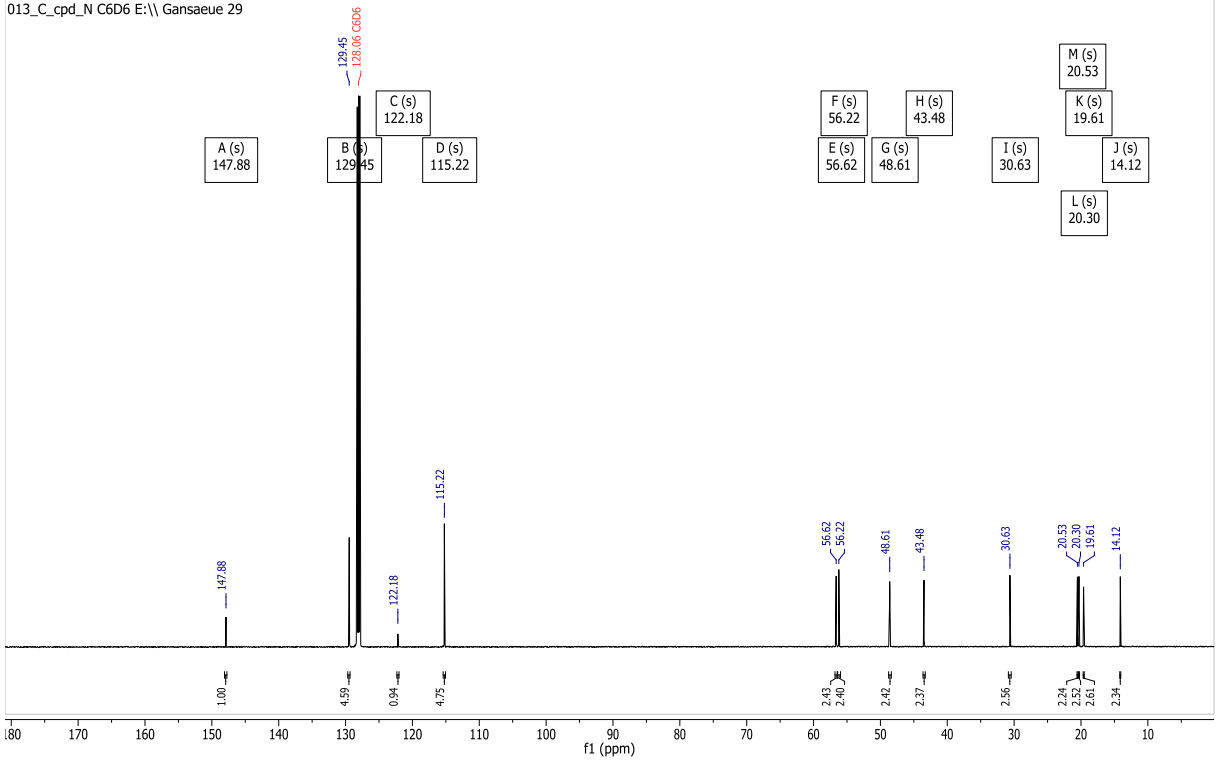

### 3.3.8 Synthesis of 4-fluoro-*N*-isopropyl-*N*-(((2*R*,3*S*)-3-propyloxirane-2-yl)methyl)aniline (**1k**).

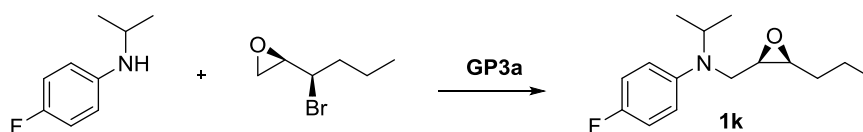

2.45 g (16 mmol, 1.0 eq.) of 4-Fluoro-*N*-cyclopentylaniline are reacted with 7.0 mL of 2.5M *n*BuLi-solution in Hexane (17.6 mmol, 1.1 eq.) and 4.33 g (2*R*,3*R*)-3-bromo-1,2-epoxyhexane (24.2 mmol, 1.5 eq.) following GP3a. After flash column chromatography (Al<sub>2</sub>O<sub>3</sub>, CH : MTBE 98:2) the product is obtained as a colorless oil in 31% yield (1.23 g, 4.9 mmol) and is stored under argon atmosphere.

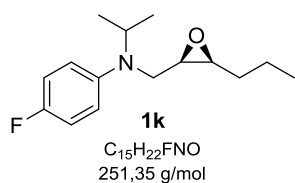

**R<sub>f</sub>** = 0.4 (10% MTBE in CH); **<sup>1</sup>H NMR (400.1 MHz, C<sub>6</sub>D<sub>6</sub>, RT) δ [ppm]** = 0.83-0.88 (m, 3H), 0.90 (d, *J* = 6.6 Hz, 3H), 0.95 (d, *J* = 6.6 Hz, 3H), 1.23-1.46 (m, 4H), 2.64 (td, *J* = 5.9 Hz, *J* = 4.1 Hz, 1H), 2.79 (ddd, *J* = 5.2 Hz, *J* = 4.1 Hz, *J* = 3.2 Hz, 1H), 2.96 (dd, *J* = 15.8 Hz, *J* = 5.3 Hz, 1H), 3.20 (dd, *J* = 15.8 Hz, *J* = 3.2 Hz, 1H), 3.60 (hept, *J* = 6.6 Hz, 1H), 6.64-6.70 (m, 2H), 6.88-6.95 (m, 2H); **<sup>13</sup>C NMR (101 MHz, C<sub>6</sub>D<sub>6</sub>, RT) δ [ppm]** = 14.1, 19.5, 20.4, 20.5, 30.6, 44.3, 49.7, 56.4, 56.6, 115.9 (d, *J*<sub>C,F</sub> = 21.9 Hz), 116.5 (d, *J*<sub>C,F</sub> = 7.2 Hz), 146.0 (d, *J*<sub>C,F</sub> = 2.0 Hz), 156.5 (d, *J*<sub>C,F</sub> = 235.9 Hz); **<sup>19</sup>F NMR (470 MHz, C<sub>6</sub>D<sub>6</sub>, RT) δ [ppm]** = -127.6; **IR ν<sub>max</sub> (neat)[cm<sup>-1</sup>]** = 515, 557, 809, 1169, 1189, 1230, 1464, 1508, 2965; **HRMS (ESI) m/z** calculated for [M+H]<sup>+</sup> 252.1758 u found 252.1755 u; **α<sub>D</sub><sup>20</sup>(CHCl<sub>3</sub>)** = -27.1°.

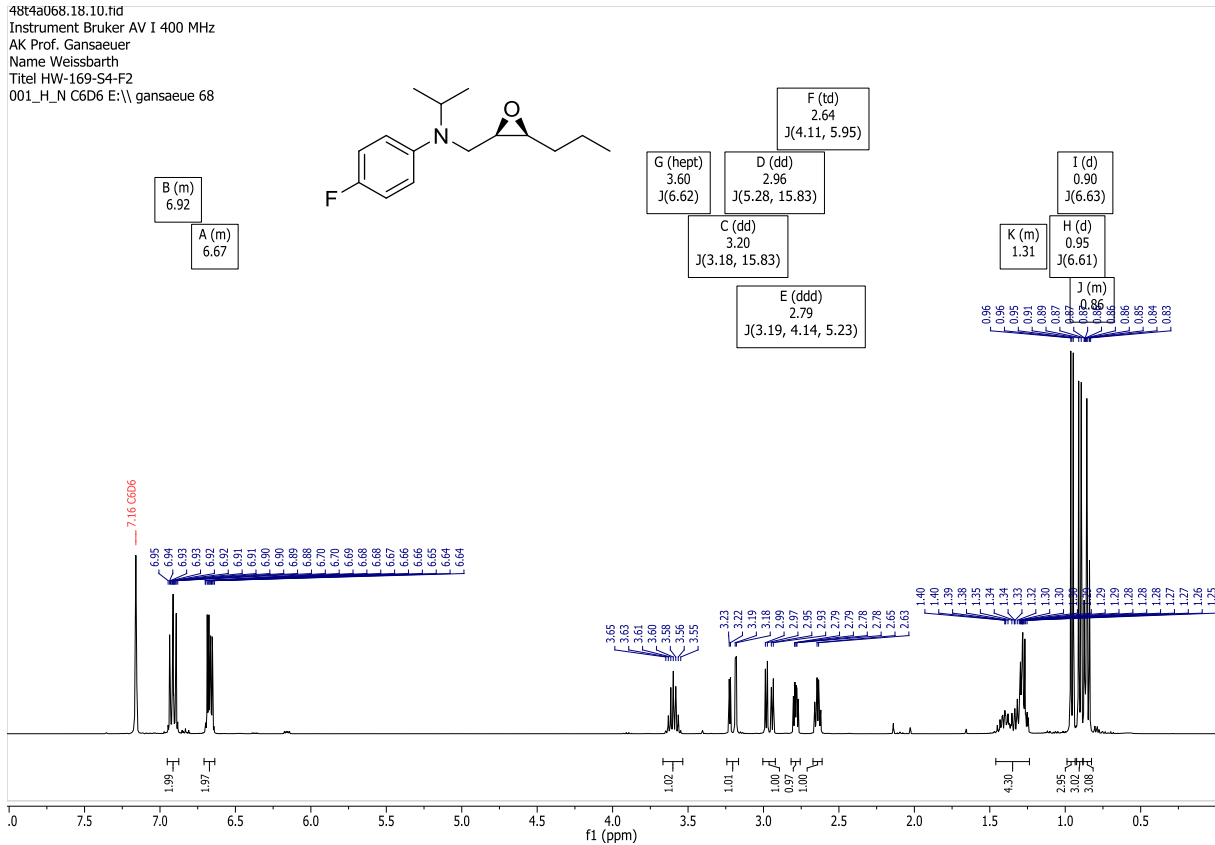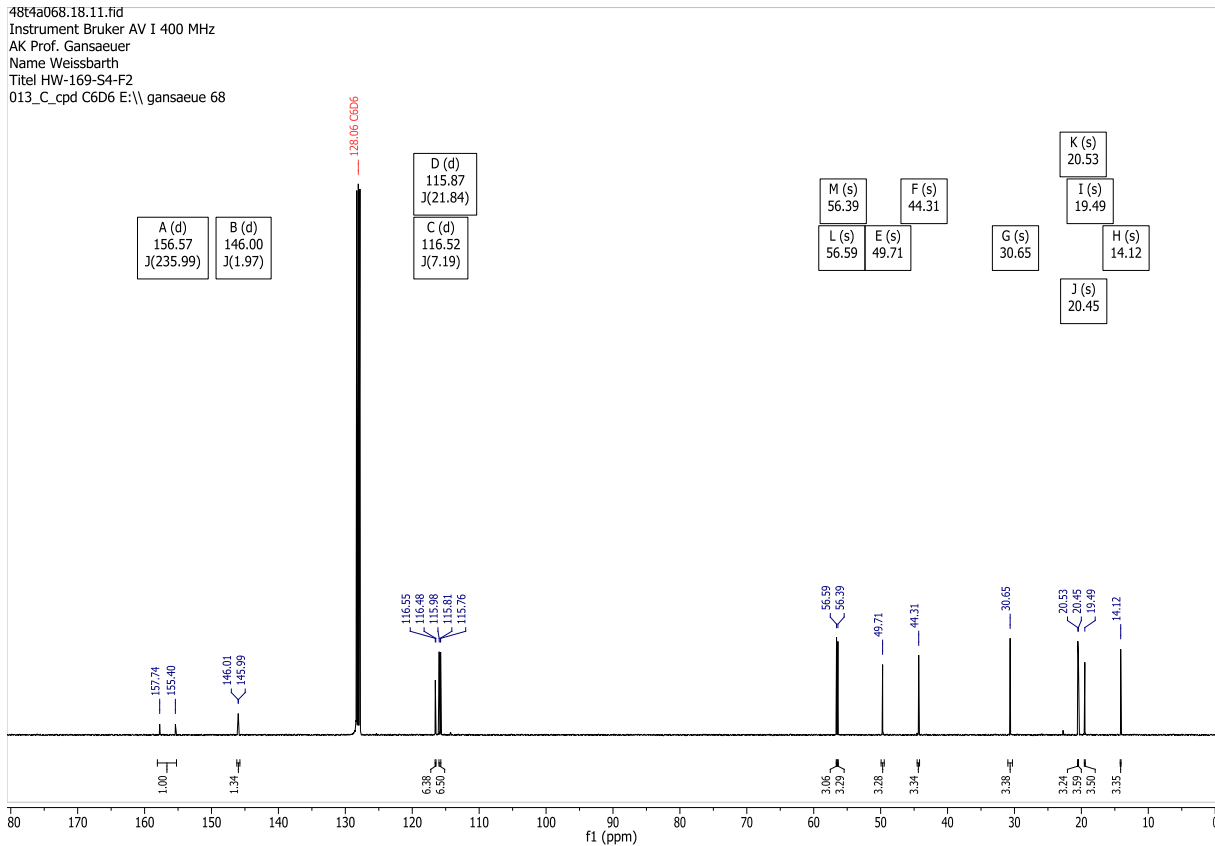

16c5a001.19.11.fid  
Instrument Bruker Avance I 500 MHz  
AK Prof. Gansaeuer  
Name Weissbarth  
Title HW-169-F  
019\_F\_cpd\_H C6D6 E:\\ gansaeue 1

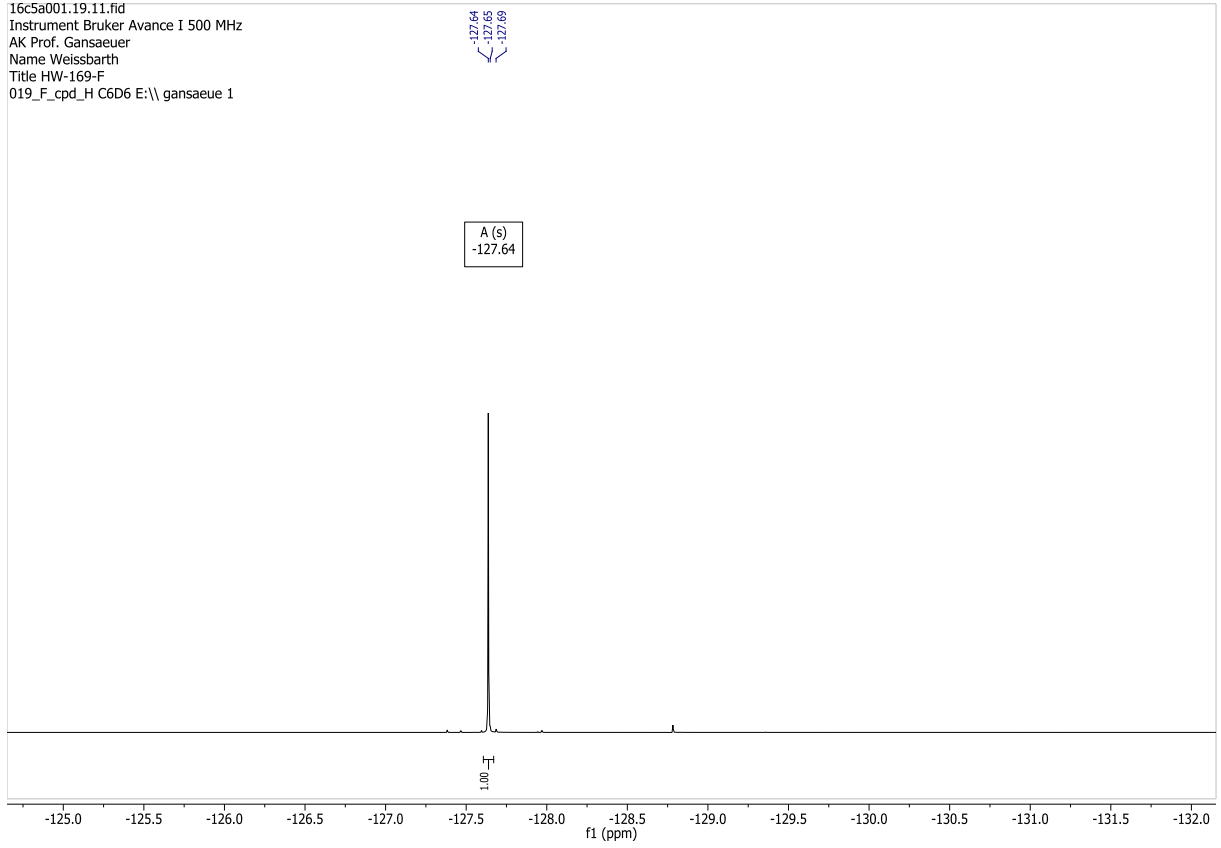

### 3.3.9 Synthesis of *N*-cyclopropyl-4-fluoro-*N*-(((2*R*,3*S*)-3-propyloxiran-2-yl)methyl)aniline (**1I**).

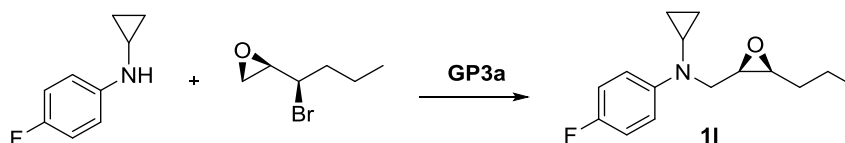

357 mg (2.36 mmol, 1.0 eq.) of 4-fluoro-*N*-cyclopropylaniline are reacted with 1.05 mL 2.5M *n*BuLi-solution in Hexane (2.6 mmol, 1.1 eq.) and 507 mg (2*R*,3*R*)-3-bromo-1,2-epoxyhexane (1.2 eq., 2.83 mmol) following GP3a. After flash column chromatography (SiO<sub>2</sub>, CH : MTBE 98:2) the product is obtained as a light yellow oil in 66% yield (386 mg, 1.55 mmol) and is stored under argon atmosphere.

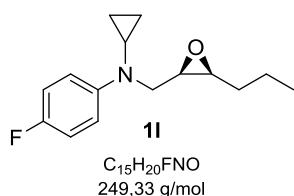

**R<sub>f</sub>** = 0.7 (20% EE in CH); **<sup>1</sup>H NMR (300.1 MHz, C<sub>6</sub>D<sub>6</sub>, RT) δ [ppm]** = 0.34-0.51 (m, 4H), 0.82-0.89 (m, 3H), 1.21-1.46 (m, 4H), 2.13-2.22 (m, 1H), 2.61 (ddd, *J* = 6.4 Hz, *J* = 5.3 Hz, *J* = 4.1 Hz, 1H), 2.81 (dt, *J* = 5.9 Hz, *J* = 4.1 Hz, 1H), 3.19 (dd, *J* = 15.5 Hz, *J* = 5.9 Hz, 1H), 3.32 (dd, *J* = 15.5 Hz, *J* = 4.1 Hz, 1H), 6.18-6.81 (m, 2H), 6.89-6.98 (m, 2H); **<sup>13</sup>C NMR (75.5 MHz, C<sub>6</sub>D<sub>6</sub>, RT) δ [ppm]** = 9.6, 9.6, 14.1, 20.5, 30.5, 32.9, 51.9, 54.7, 56.3, 115.6 (d, *J*<sub>C,F</sub> = 21.9 Hz), 116.3 (d, *J*<sub>C,F</sub> = 7.2 Hz), 146.7 (d, *J*<sub>C,F</sub> = 2.1 Hz), 156.9 (d, *J*<sub>C,F</sub> = 236.2 Hz); **<sup>19</sup>F NMR (470 MHz, C<sub>6</sub>D<sub>6</sub>, RT) δ [ppm]** = -127.3; **IR ν<sub>max</sub> (neat)[cm<sup>-1</sup>]** = 771, 817, 1223, 1364, 1455, 1507, 2962; **HRMS (ESI) m/z** calculated for [M+H]<sup>+</sup> 250.1602 u found 250.1602 u; **α<sub>D</sub><sup>20</sup>(CHCl<sub>3</sub>)** = -10.0°.

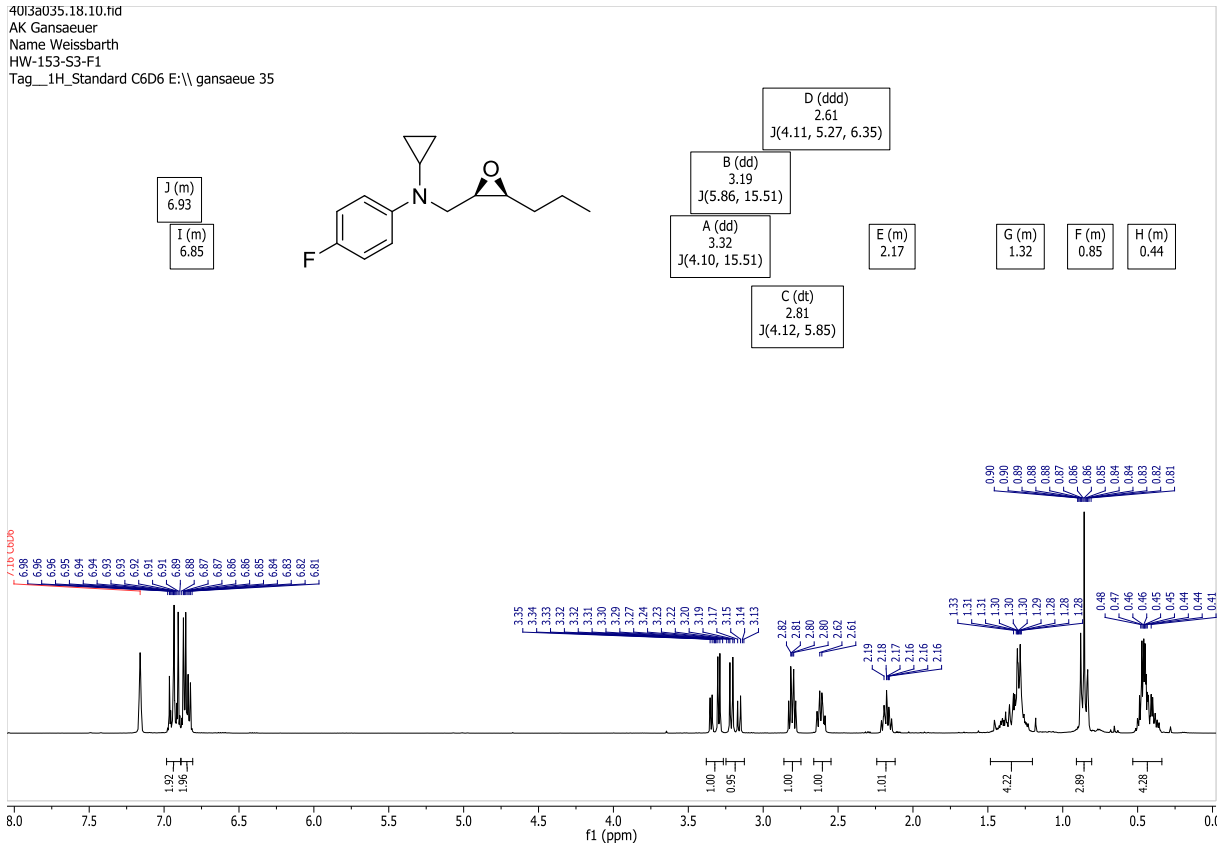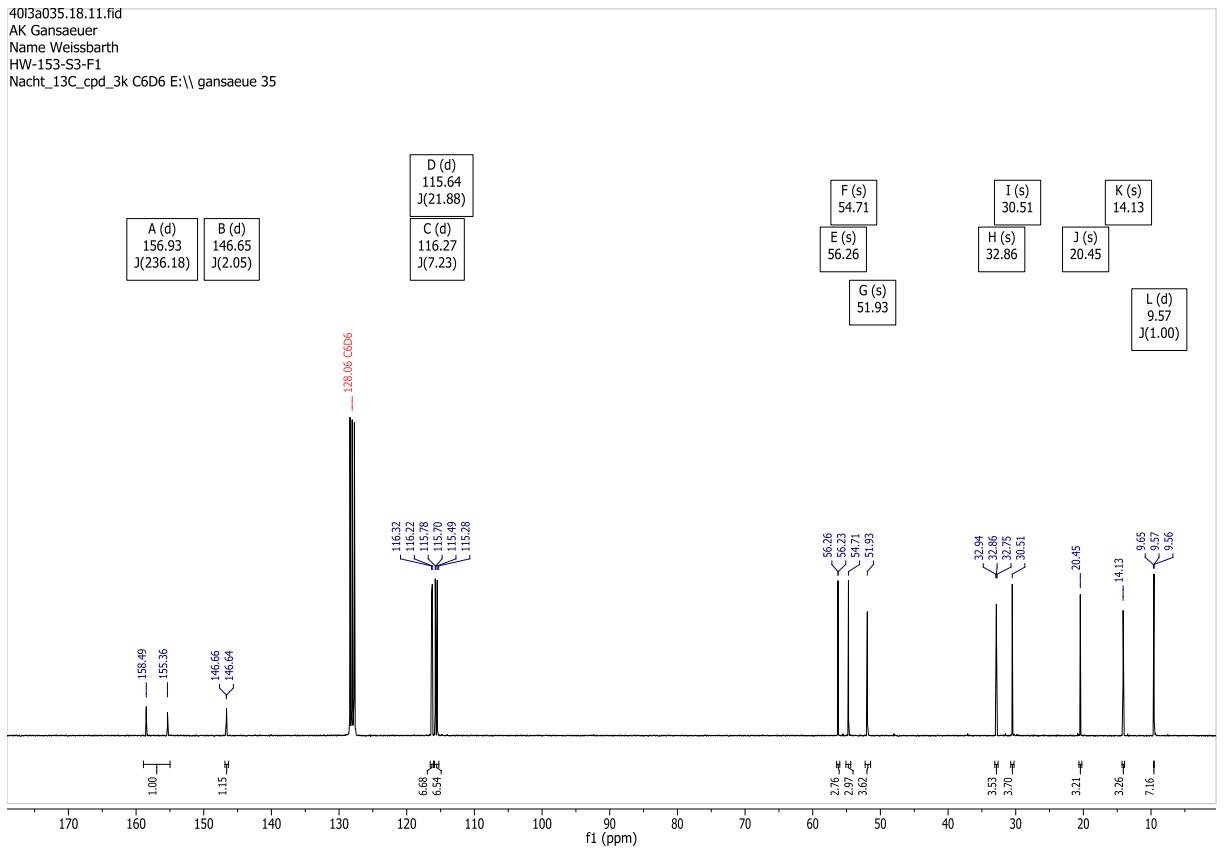

16c5a028.19.11.fid  
Instrument Bruker Avance I 500 MHz  
AK Prof. Gansaeuer  
Name Weissbarth  
Title HW-153F-S2  
019\_F\_cpd\_H C6D6 E:\\ gansaeue 28

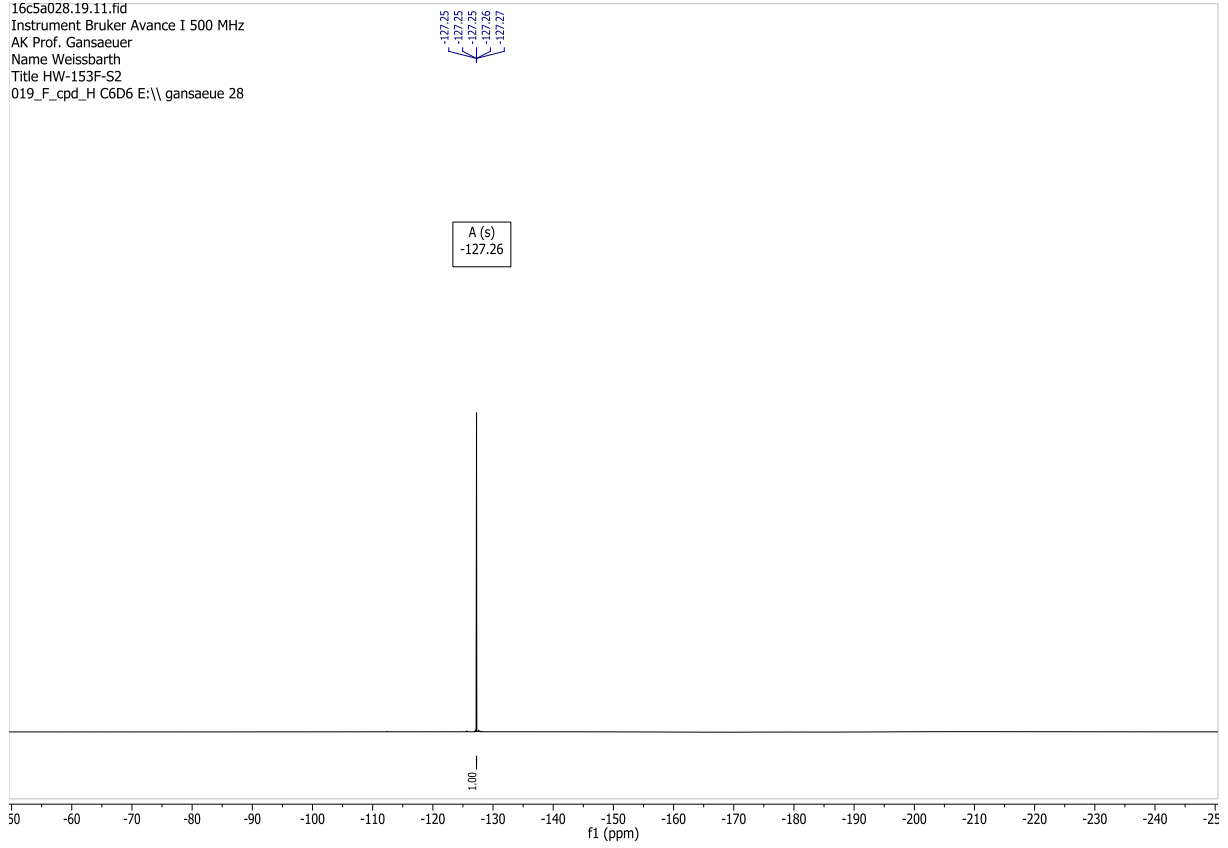



### 3.3.10 Synthesis of methyl 4-(methyl(((2*R*,3*S*)-3-propyloxiran-2-yl)methyl)amino)benzoate (**1n**).

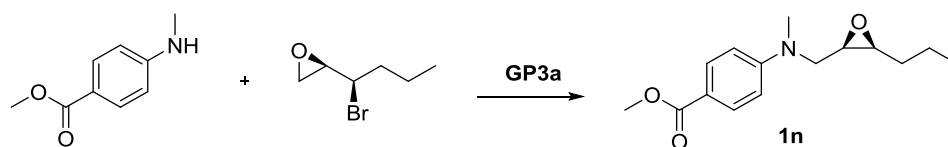

1.34 g (8.1 mmol, 1.0 eq.) of Methyl-4-(methylamino)benzoate are reacted with 3.6 mL of 2.5M *n*BuLi-solution in Hexane (8.9 mmol, 1.1 eq.) and 1.74 g (2*R*,3*R*)-3-bromo-1,2-epoxyhexane (9.7 mmol, 1.2 eq.) following GP3a. After flash column chromatography (SiO<sub>2</sub>, CH : MTBE 98:2) the product is obtained as a colorless oil in 29% yield (613 mg, 2.8 mmol) and is stored under argon atmosphere.

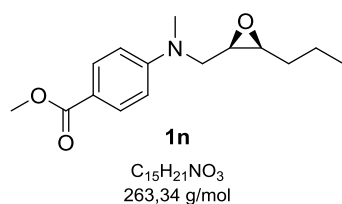

**R<sub>f</sub>** = 0.4 (30% Et<sub>2</sub>O in CH); **<sup>1</sup>H NMR (300.1 MHz, C<sub>6</sub>D<sub>6</sub>, RT) δ [ppm]** = 0.83 (t, *J* = 7.1 Hz, 3H), 1.13-1.40 (m, 4H), 2.53 (s, 3H), 2.65 (dt, *J* = 6.5 Hz, *J* = 3.9 Hz, 1H), 2.87 (ddd, *J* = 15.7 Hz, *J* = 6.5 Hz, *J* = 1.0 Hz, 1H), 3.16 (dd, *J* = 15.5 Hz, *J* = 3.7 Hz, 1H), 3.62 (s, 3H), 6.47-6.54 (m, 2H), 8.21-8.29 (m, 2H); **<sup>13</sup>C NMR (75 MHz, C<sub>6</sub>D<sub>6</sub>, RT) δ [ppm]** = 14.1, 20.4, 30.3, 38.2, 51.0, 51.2, 54.2, 55.6, 111.6, 131.9, 152.7, 167.1; **IR ν<sub>max</sub> (neat)[cm<sup>-1</sup>]** = 700, 752, 767, 839, 946, 1097, 1145, 1175, 1188, 1252, 1261, 1279, 1378, 1523, 1599, 1702, 2981; **HRMS (ESI) m/z** calculated for [M+H]<sup>+</sup> 264.1594 u found 264.1591 u; **α<sub>D</sub><sup>20</sup>(CHCl<sub>3</sub>)** = -1.9°.

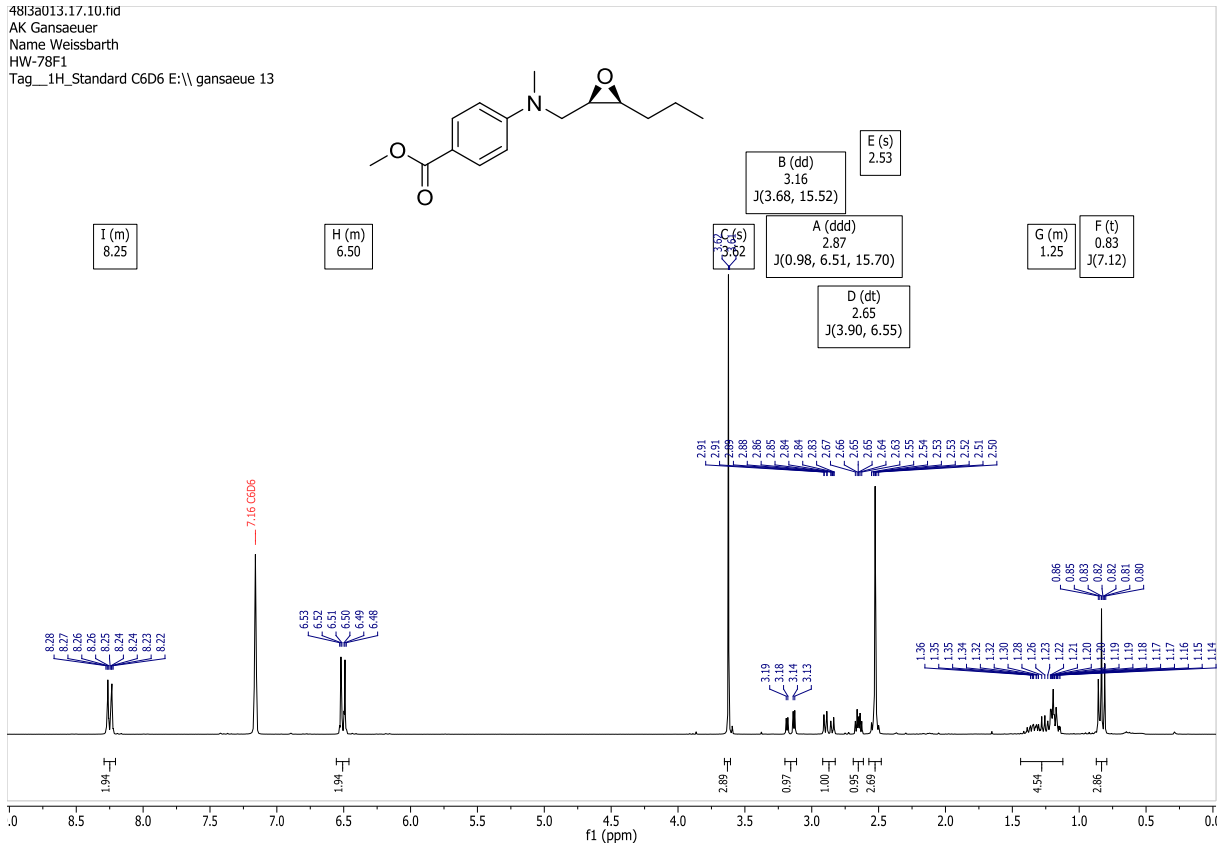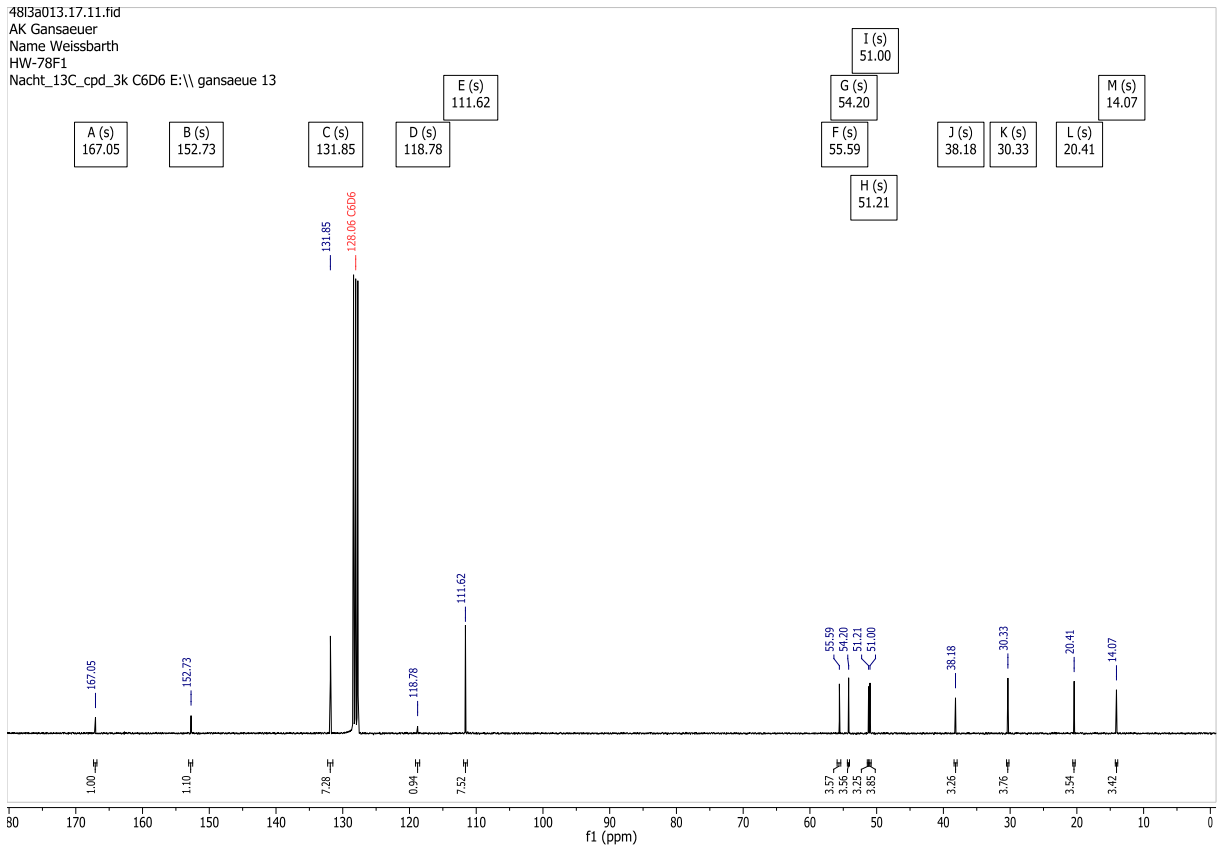

### 3.4 SiO<sub>2</sub>-catalyzed aminolysis of bromo-epoxides to bromo-alcohols and subsequent formation of aniline-epoxides (A→1).

#### 3.4.1. Synthesis of *N*-phenyl-*N*-(((2*R*,3*S*)-3-propyloxiran-2-yl)methyl)aniline (**1a**).

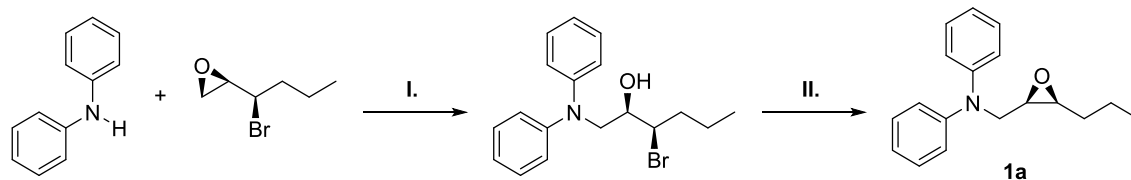

According to GP3: **I.** aminolysis: 1.69 g of diphenylamine (1.00 eq., 10.0 mmol), 1.79 g (2*R*,3*R*)-3-bromo-1,2-epoxyhexane (1.00 eq., 10.0 mmol) and 696 mg SiO<sub>2</sub> are reacted for 72 hours at 80 °C (without solvent). Flash chromatography (SiO<sub>2</sub>, Eluent: Ch : Et<sub>2</sub>O = 95 : 5) yielded 1.04 g (2*R*,3*R*)-3-bromo-1-(diphenylamino)-hexan-2-ol 30 % as a colorless liquid. **II.** epoxide formation: 880 mg of (2*R*,3*R*)-3-bromo-1-(diphenylamino)-hexan-2-ol (1.00 eq., 2.53 mmol) and 698 mg K<sub>2</sub>CO<sub>3</sub> (2.00 eq., 5.05 mmol) are reacted for 1 hour at 40 °C in MeOH. Flash chromatography (SiO<sub>2</sub>, Eluent: Ch : Et<sub>2</sub>O = 98 : 2) yielded 613 g **1a** (84%) as colorless liquid.

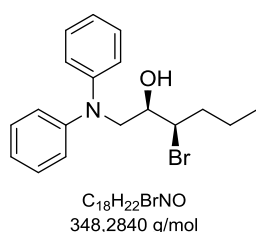

$R_f = 0.35$  (20% Et<sub>2</sub>O in CH), <sup>1</sup>H-NMR (300 MHz, C<sub>6</sub>D<sub>6</sub>, RT):  $\delta$  [ppm] = 0.67 (t,  $J = 7.3$  Hz, 3H), 1.03-1.21 (m, 1H), 1.31-1.43 (m, 1H), 1.44-1.58 (m, 1H), 1.77 (dtd,  $J = 14.1$  Hz,  $J = 9.8$  Hz,  $J = 4.5$  Hz, 1H), 1.89-1.95 (m, 1H), 3.65-3.73 (m, 1H), 3.77-3.81 (m, 2H), 3.92 (ddd,  $J = 9.7$  Hz,  $J = 4.5$  Hz,  $J = 2.2$  Hz, 1H), 6.85 (tt,  $J = 7.4$  Hz,  $J = 1.4$  Hz, 1H), 7.03-7.15 (m, 8H); <sup>13</sup>C-NMR (75 MHz, C<sub>6</sub>D<sub>6</sub>, RT):

$\delta$  [ppm] = 13.4, 21.4, 37.7, 57.4, 61.4, 70.7, 121.9, 122.2, 129.7, 148.8. IR  $\tilde{\nu}$  [cm<sup>-1</sup>] = 408, 419, 498, 543, 594, 694, 747, 1031, 1072, 1204, 1247, 1355, 1493, 1587. HRMS (ESI):  $m/z$  calculated for C<sub>18</sub>H<sub>23</sub>NBrO<sup>+</sup>: 348.0958 u; found: 348.0948 u.  $[\alpha]_D^{20} = -14.4^\circ$  (c 0.5, CHCl<sub>3</sub>).

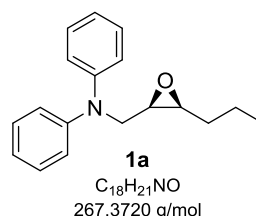

$R_f = 0.8$  (20% Et<sub>2</sub>O in CH), <sup>1</sup>H-NMR (300 MHz, C<sub>6</sub>D<sub>6</sub>, RT):  $\delta$  [ppm] = 0.77 (t,  $J = 7.2$  Hz 3H), 1.03-1.33 (m, 4H), 2.58 (ddd,  $J = 6.9$  Hz,  $J = 4.9$  Hz,  $J = 4.0$  Hz, 1H), 3.04 (dt,  $J = 5.6$  Hz,  $J = 4.2$  Hz, 1H), 3.61 (dd,  $J = 15.7$  Hz,  $J = 5.5$  Hz, 1H), 3.74 (dd,  $J = 15.7$  Hz,  $J = 4.2$  Hz, 1H), 6.84-6.87 (m, 2H), 7.04-7.12 (m, 8H); <sup>13</sup>C-

NMR (75 MHz, C<sub>6</sub>D<sub>6</sub>, RT):  $\delta$  [ppm] = 14.1, 20.3, 30.3, 51.5, 54.6, 56.6, 121.7, 122.0, 129.7, 148.5. IR  $\tilde{\nu}$  [cm<sup>-1</sup>] = 692, 747, 1223, 1249, 1362, 1493, 1589. HRMS (ESI):  $m/z$  calculated for C<sub>18</sub>H<sub>22</sub>NO<sup>+</sup>: 268.1696 u; found: 268.1690 u.  $[\alpha]_D^{20} = -88.0$  (c 0.5, CHCl<sub>3</sub>).

4813b001.17.10.fid  
 AK Gansaeuer  
 Name Muehlhaus  
 fxm399\_c2\_tt13  
 Nacht\_\_1H\_Standard C6D6 E:\ gansaeue 1

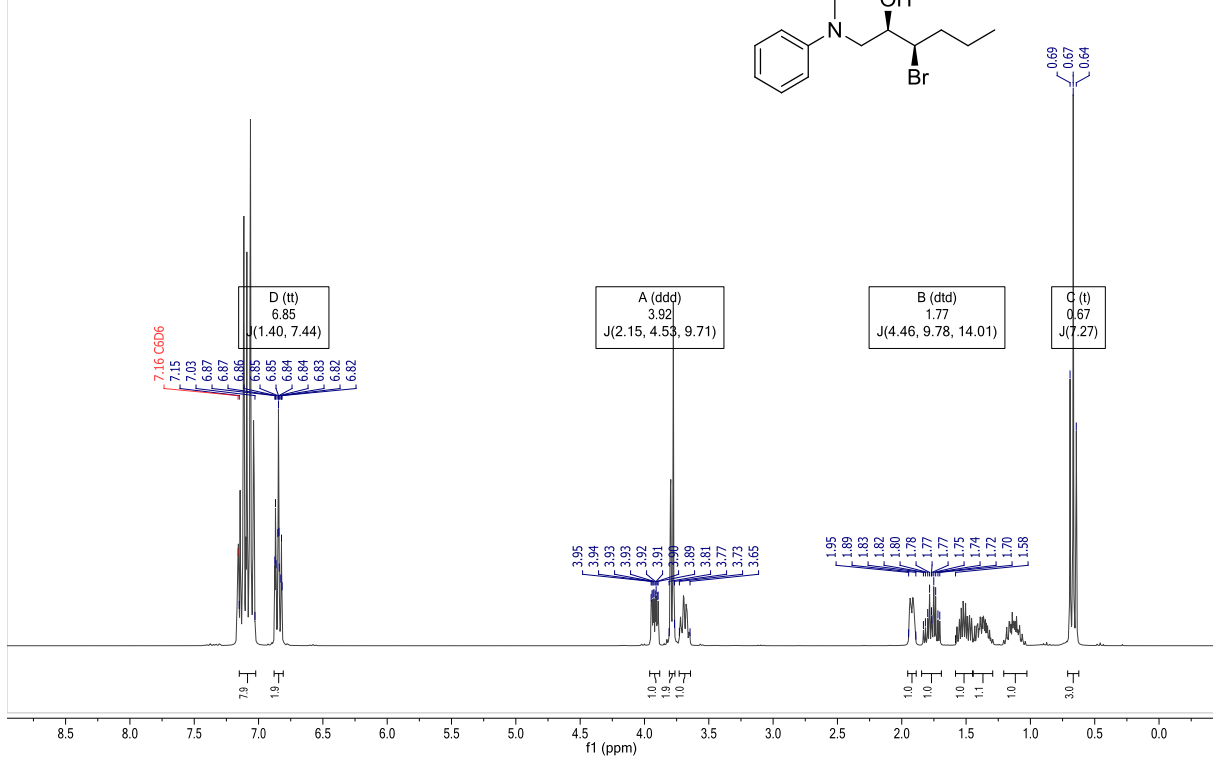

4813b001.17.11.fid  
 AK Gansaeuer  
 Name Muehlhaus  
 fxm399\_c2\_tt13  
 Nacht\_13C\_cpds\_3k C6D6 E:\ gansaeue 1

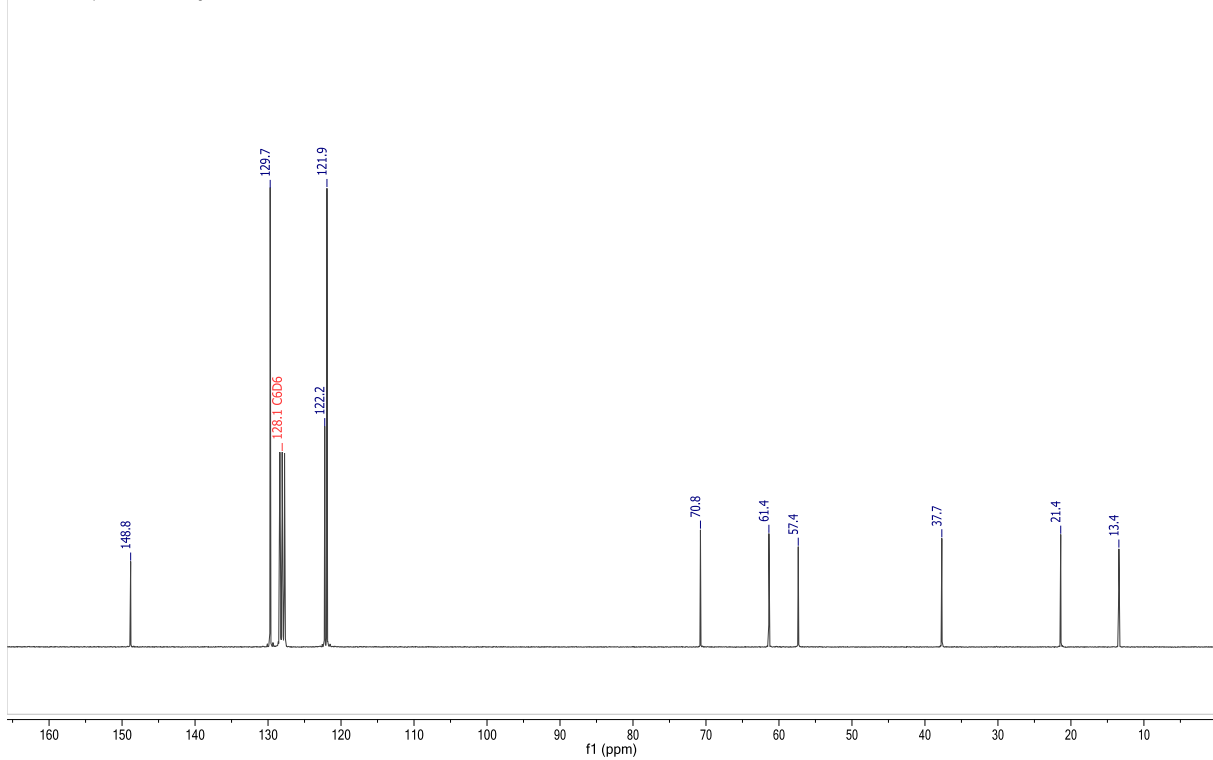

0813C012.18.10.fid  
 AK Gansaeuer  
 Name Weissbarth  
 HW-90-S3F1  
 Tag\_\_1H\_Standard C6D6 E:\\ gansaeue 12

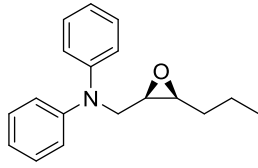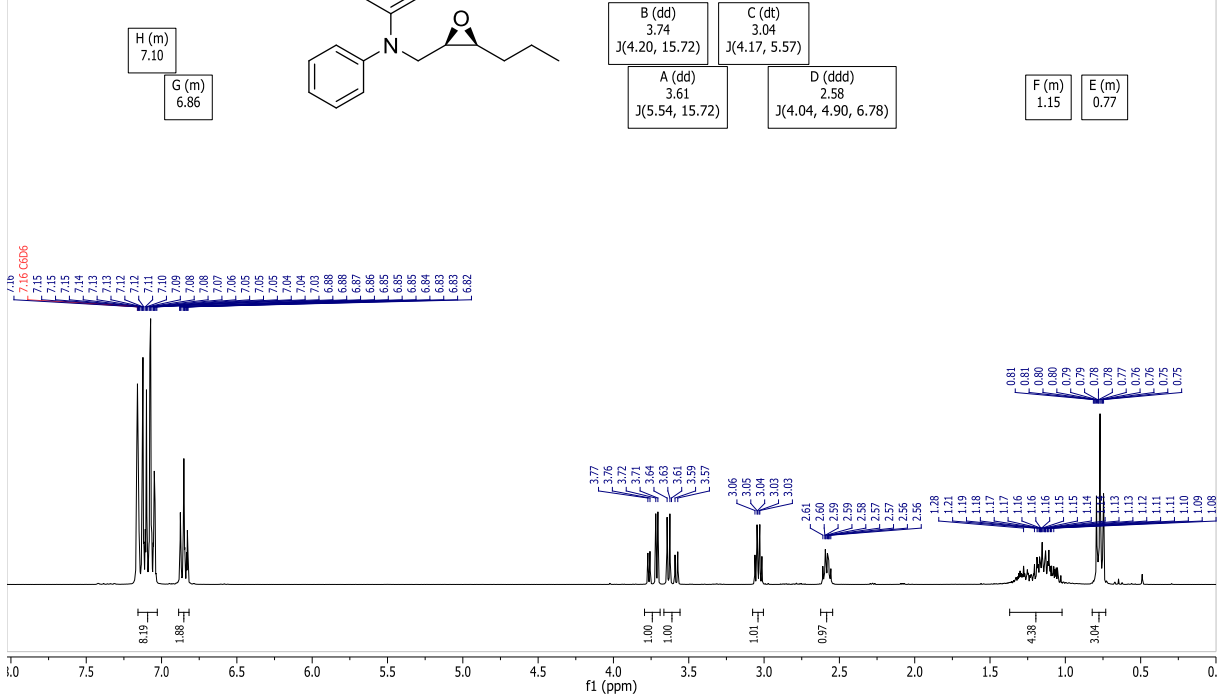

0813C012.18.11.fid  
 AK Gansaeuer  
 Name Weissbarth  
 HW-90-S3F1  
 Nacht\_13C\_cpd\_3k C6D6 E:\\ gansaeue 12

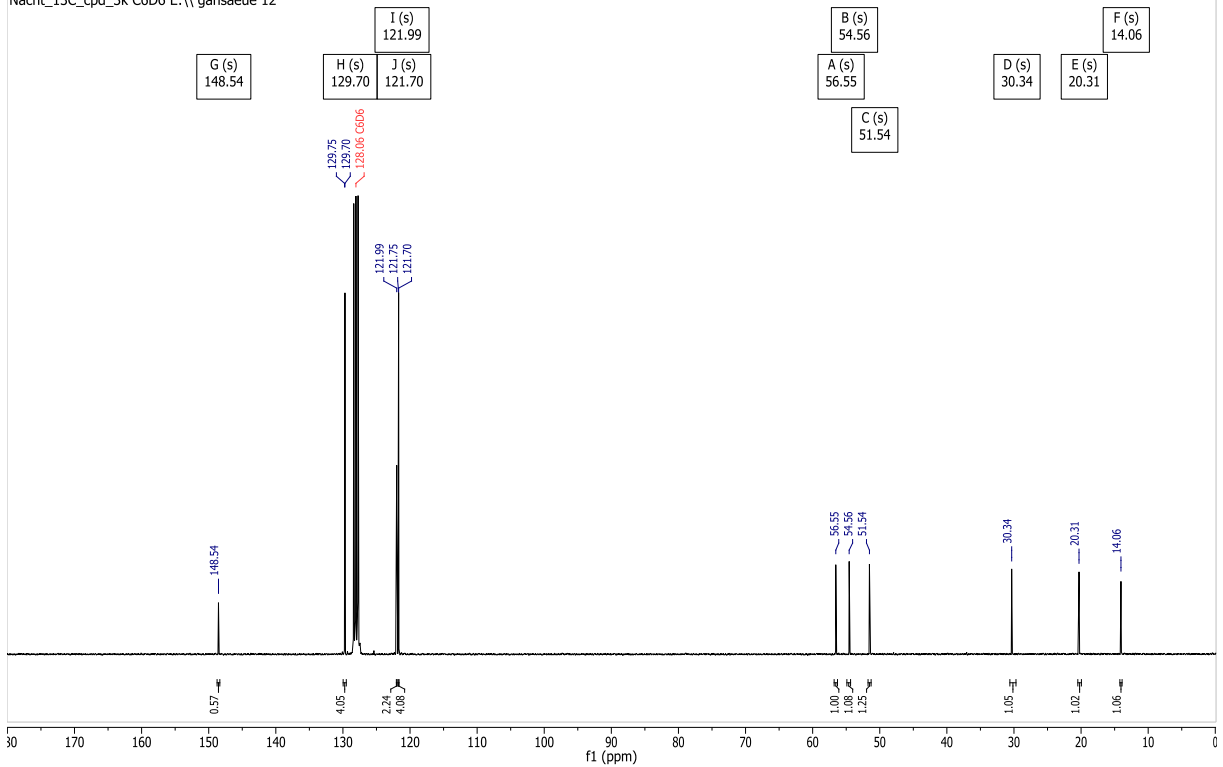

### 3.4.2. Synthesis of *N*-cyclohexyl-*N*-(((2*R*,3*S*)-3-propyloxiran-2-yl)methyl)aniline (**1d**).

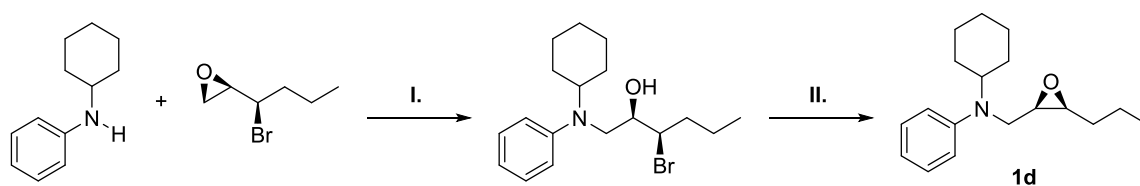

According to GP3b: **I.** aminolysis: 1.75 g of *N*-cyclohexylaniline (1.00 eq., 10.0 mmol), 1.79 g (2*R*,3*R*)-3-bromo-1,2-epoxyhexane (1.00 eq., 10.0 mmol) and 696 mg SiO<sub>2</sub> are reacted for 7 days hours at RT (without solvent). Flash chromatography (SiO<sub>2</sub>, Eluent: Ch : Et<sub>2</sub>O = 95 : 5) yielded 847 mg (2*R*,3*R*)-3-bromo-1-(cyclohexyl(phenyl)amino)-hexan-2-ol (24%) as a colorless liquid. **II.** epoxide formation: 788 mg of (2*R*,3*R*)-3-bromo-1-(cyclohexyl(phenyl)amino)-hexan-2-ol (1.00 eq., 2.22 mmol) and 614 mg K<sub>2</sub>CO<sub>3</sub> (2.00 eq., 4.44 mmol) are reacted for 1 hour at 40 °C in MeOH. Flash chromatography (SiO<sub>2</sub>, Eluent: Ch : Et<sub>2</sub>O = 98 : 2) yielded 392 g **1d** (65%) as a colorless liquid.

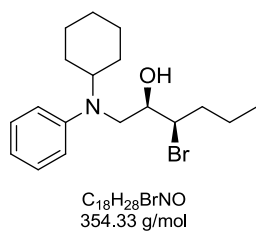

$R_f = 0.4$  (20% Et<sub>2</sub>O in CH), **<sup>1</sup>H-NMR (300 MHz, C<sub>6</sub>D<sub>6</sub>, RT):  $\delta$  [ppm] = 0.70 (t, 3H,  $J = 7.3$  Hz), 0.79-1.35 (m, 8H), 1.34-1.48 (m, 1H), 1.45-1.76 (m, 8H), 1.94 (dtd, 1H,  $J = 14.1$  Hz,  $J = 9.8$  Hz,  $J = 4.7$  Hz), 2.26-2.37 (m, 1H), 3.18-3.32 (m, 2H)\*, 3.55-3.62 (m, 1H), 4.07 (ddd, 1H,  $J = 9.7$  Hz,  $J = 4.6$  Hz,  $J = 2.0$  Hz), 6.84 (tt, 1H,  $J = 7.2$  Hz,  $J = 1.1$  Hz), 6.93 (d, 1H,  $J = 6.9$  Hz), 7.17-7.22 (m, 2H).** \*signal integrates to 3H caused by impurity. **<sup>13</sup>C-NMR (75 MHz, C<sub>6</sub>D<sub>6</sub>, RT):  $\delta$  [ppm] = 13.5, 21.5, 26.1, 26.4, 26.5, 27.3, 31.1, 31.3, 38.1, 50.5, 61.5, 62.8, 70.2, 119.4, 120.5, 129.4, 149.6.** **IR  $\tilde{\nu}$  [cm<sup>-1</sup>] = 504, 691, 868, 1027, 1147, 1254, 1319, 1449, 1502, 1600, 2852, 2926.** **HRMS (ESI):  $m/z$  calculated for  $C_{18}H_{29}NBrO^+$ : 354.1427 u; found: 354.1426 u.  $[\alpha]_D^{20} = 6.0$  ( $c$  0.2, CHCl<sub>3</sub>).**

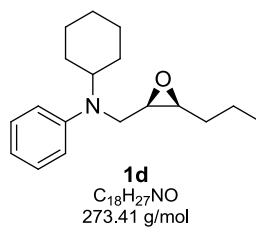

$R_f = 0.7$  (20% Et<sub>2</sub>O in CH), **<sup>1</sup>H-NMR (500 MHz, C<sub>6</sub>D<sub>6</sub>, RT):  $\delta$  [ppm] = 0.84-0.90 (m, 3H), 0.96 (tt, 2H,  $J = 12.8$  Hz,  $J = 3.7$  Hz), 1.08-1.53 (m, 10H), 1.60-1.73 (m, 2 H), 1.84 (d, 1H,  $J = 16.7$  Hz), 2.68 (dt, 1H,  $J = 6.6$  Hz,  $J = 4.4$  Hz), 2.85-2.90 (m, 1H), 3.15 (dd, 1H,  $J = 16.3$  Hz,  $J = 5.5$  Hz), 3.41 (dd, 1H,  $J = 16.2$  Hz,  $J = 3.0$  Hz), 3.49 (dd, 1H,  $J = 12.0$  Hz,  $J = 3.4$  Hz), 6.79-6.84 (m, 1H), 6.94 (d, 2H,  $J = 6.1$  Hz), 7.25-7.30 (m, 2H).** **<sup>13</sup>C-NMR (125 MHz, C<sub>6</sub>D<sub>6</sub>, RT):  $\delta$  [ppm] = 14.2, 20.6, 26.2, 26.4, 26.5, 30.8, 30.9, 31.5, 44.5, 56.7, 56.8, 57.7, 114.2, 117.5, 129.7, 149.4.** **IR  $\tilde{\nu}$  [cm<sup>-1</sup>] = 691, 744, 1174, 1234, 1450, 1503, 1595, 2929.** **HRMS (ESI):  $m/z$  calculated for  $C_{18}H_{28}NO^+$ : 274.2165 u, found: 274.2158 u.  $[\alpha]_D^{20} = -20.9$  ( $c$  0.1, CHCl<sub>3</sub>).**

fxm213 F2 3613c013.16.10.fid  
 AK Gansaeuer  
 Name Muehlhaus  
 fxm213 F2  
 Tag\_\_1H\_Standard C6D6 E:\ gansaeue 13

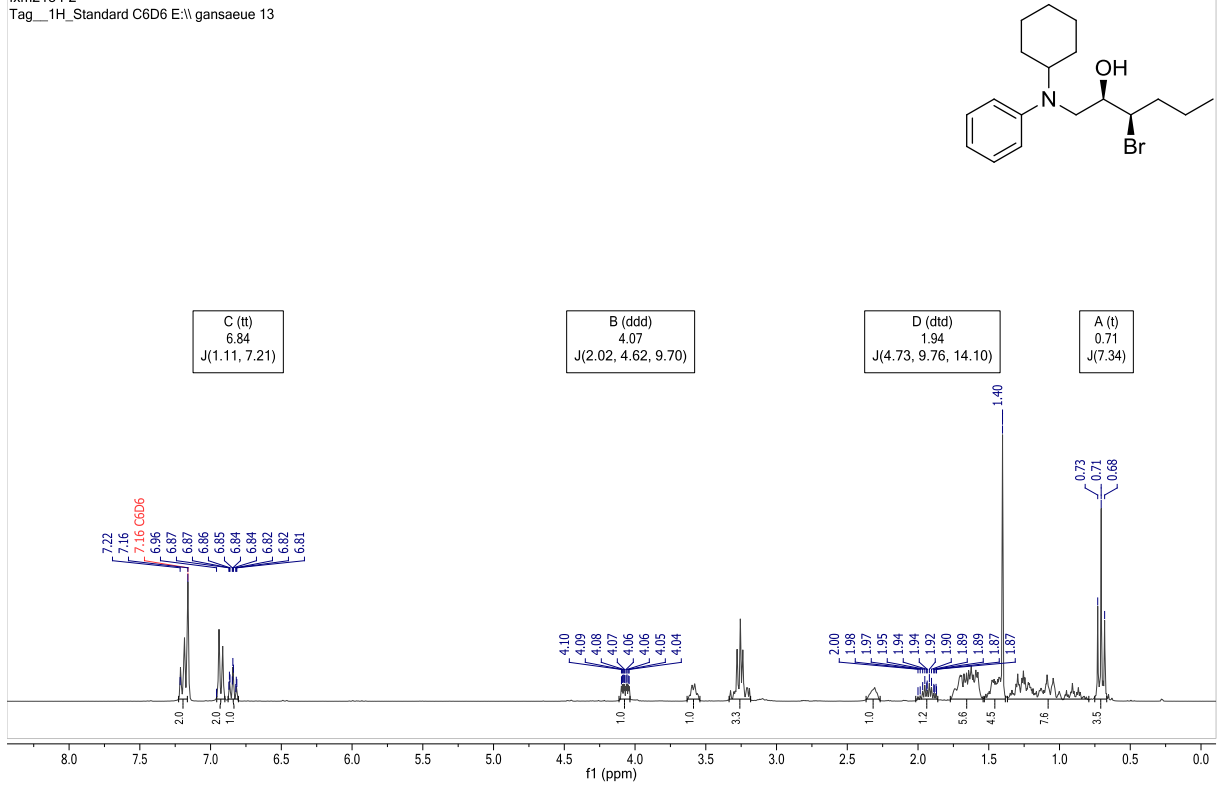

fxm213 F2 3613c013.16.11.fid  
 AK Gansaeuer  
 Name Muehlhaus  
 fxm213 F2  
 Nacht\_13C\_cpd\_3k C6D6 E:\ gansaeue 13

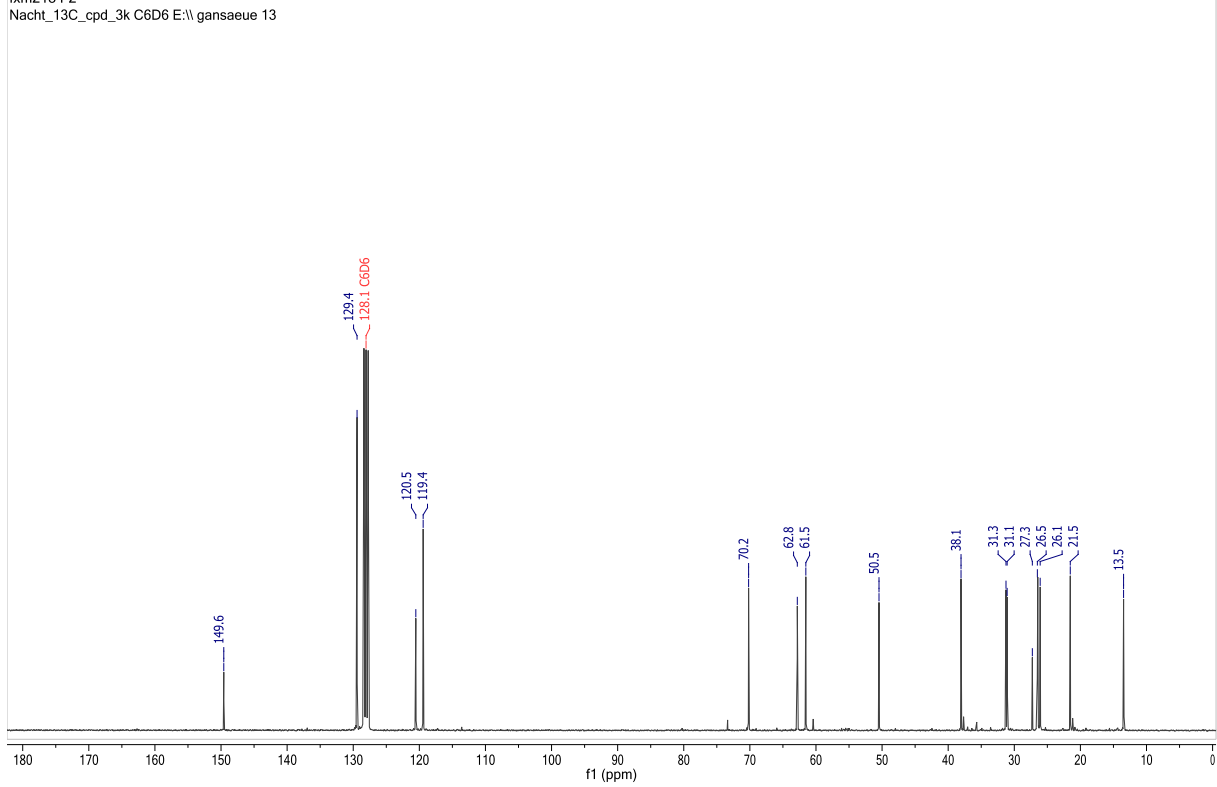

fxm226\_F1\_39c5a012.16.10.fid  
Instrument Bruker Avance I 500 MHz  
AK Prof. Gansaeuer  
Name Muehlhaus  
fxm226\_F1  
001\_H\_Standard C6D6 E:\gansaeue 12

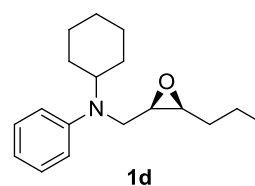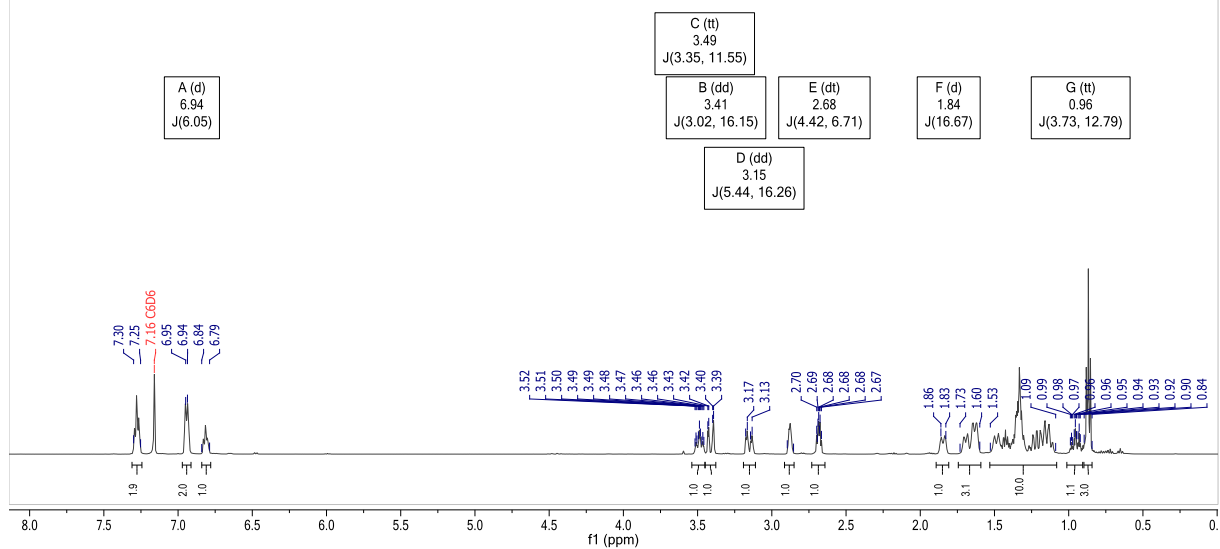

fxm226\_F1\_39c5a012.16.11.fid  
Instrument Bruker Avance I 500 MHz  
AK Prof. Gansaeuer  
Name Muehlhaus  
fxm226\_F1  
013\_C\_cpd\_N C6D6 E:\gansaeue 12

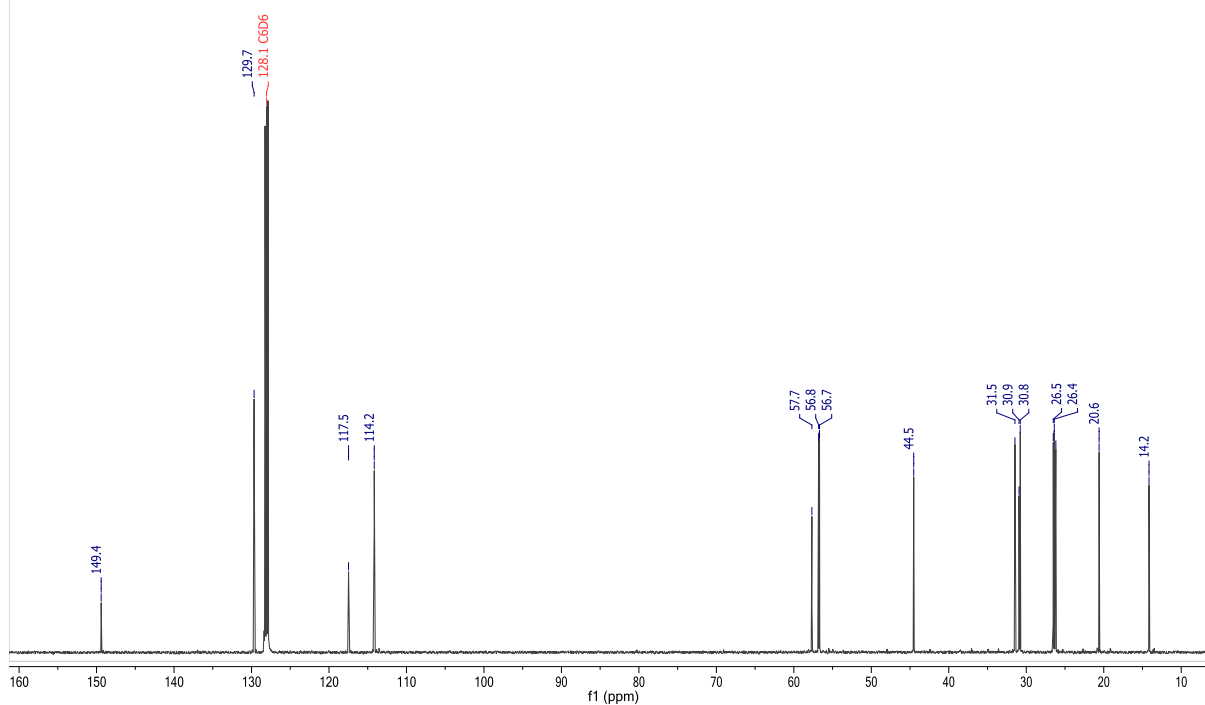



### 3.4.3. Synthesis of *N*-methyl-*N*-(((2*R*,3*S*)-3-propyloxiran-2-yl)methyl)aniline (**1g**).

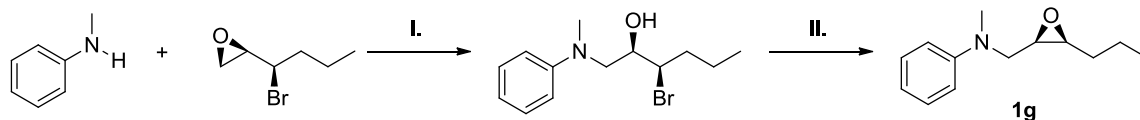

According to GP3b: **I.** aminolysis: 2.38 g of *N*-methylaniline (1.00 eq., 22.2 mmol), 3.63 g (2*R*,3*R*)-3-bromo-1,2-epoxyhexane (1.00 eq., 22.2 mmol) and 1.20 g SiO<sub>2</sub> are reacted for 2 days hours at RT (without solvent). Flash chromatography (SiO<sub>2</sub>, Eluent: Ch : Et<sub>2</sub>O = 95 : 5) yielded 4.24 g (2*R*,3*R*)-3-bromo-1-(methyl(phenyl)amino)-hexan-2-ol (67%) as a colorless liquid. **II.** epoxide formation: 4.20 g of (2*R*,3*R*)-3-bromo-1-(methyl(phenyl)amino)-hexan-2-ol (1.00 eq., 14.7 mmol) and 4.05 g K<sub>2</sub>CO<sub>3</sub> (2.00 eq., 29.3 mmol) are reacted for 1 hour at 40 °C in MeOH. Flash chromatography (SiO<sub>2</sub>, Eluent: Ch : Et<sub>2</sub>O = 98 : 2) yielded 3.03 g **1g** (100%) as a colorless liquid.

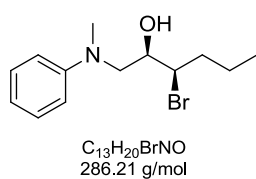

$R_f = 0.3$  (20% Et<sub>2</sub>O in CH), <sup>1</sup>H-NMR (300 MHz, C<sub>6</sub>D<sub>6</sub>, RT):  $\delta$  [ppm] = 0.70 (t, 3H,  $J = 7.2$  Hz), 1.07-1.22 (m, 1H), 1.34-1.58 (m, 2H), 1.68-1.86 (m, 2H), 2.64 (s, 3H), 3.16-3.32 (m, 2H), 3.50-3.59 (m, 1H), 3.83 (ddd, 1H,  $J = 9.8$  Hz,  $J = 4.4$  Hz,  $J = 2.3$  Hz), 6.68-6.73 (m, 2H), 6.75-6.82 (m, 1H), 7.18-7.26 (m, 2H). <sup>13</sup>C-NMR

(75 MHz, C<sub>6</sub>D<sub>6</sub>, RT):  $\delta$  [ppm] = 13.5, 21.5, 37.8, 39.5, 58.0, 61.9, 71.7, 113.2, 117.6, 129.6, 149.9. IR (Film)  $\tilde{\nu}$  [cm<sup>-1</sup>] = 412, 422, 488, 513, 692, 746, 991, 1034, 1075, 1119, 1204, 1241, 1343, 1449, 1505, 1599, 2959. HRMS (ESI):  $m/z$  calculated for C<sub>13</sub>H<sub>21</sub>BrNO<sup>+</sup> [M+H]<sup>+</sup>: 286.0801 u; found: 286.0786 u.  $[\alpha]_D^{20} -23.5^\circ$  (c 0.2, CHCl<sub>3</sub>).

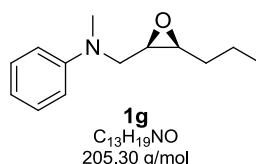

$R_f = 0.5$  (20% Et<sub>2</sub>O in CH); <sup>1</sup>H-NMR (300 MHz, C<sub>6</sub>D<sub>6</sub>, RT):  $\delta$  [ppm] = 0.84 (t, 3H,  $J = 7.0$  Hz), 1.18-1.42 (m, 4H), 2.57 (ddd, 1H,  $J = 6.3$  Hz,  $J = 4.9$  Hz,  $J = 3.0$  Hz), 2.69 (s, 3H), 2.83 (ddd, 1H,  $J = 6.2$  Hz,  $J = 4.0$  Hz,  $J = 4.0$  Hz), 3.06 (dd, 1H,  $J = 15.4$  Hz,  $J = 6.4$  Hz), 3.29 (dd, 1H,  $J = 15.4$  Hz,  $J = 3.9$  Hz), 6.74 (d, 2H,  $J = 8.8$

Hz); 6.80 (tt, 1H,  $J = 7.3$  Hz,  $J = 1.1$  Hz), 7.24 (ddt, 2H,  $J = 8.7$  Hz,  $J = 7.1$  Hz,  $J = 0.9$  Hz). <sup>13</sup>C-NMR (75 MHz, C<sub>6</sub>D<sub>6</sub>, RT):  $\delta$  [ppm] = 14.1, 20.4, 30.4, 38.6, 51.8, 54.6, 55.7, 112.6, 113.5, 117.5, 129.5, 150.1. IR (Film)  $\tilde{\nu}$  [cm<sup>-1</sup>] = 406, 512, 690, 746, 775, 827, 860, 957, 990, 1034, 1120, 1208, 1244, 1365, 1451, 1504, 1599, 2871, 2959; HRMS (ESI):  $m/z$  calculated for C<sub>13</sub>H<sub>20</sub>NO<sup>+</sup> [M+H]<sup>+</sup>: 206.1539 u; found: 206.1540 u.  $[\alpha]_D^{20} -18.2^\circ$  (c 0.5, CHCl<sub>3</sub>), determination of e.r. by HPLC: KNAUER Eurocel 01; *n*-hexane/2-propanol (90:10); flowrate 1.0 mL/min;  $t_R = 7.9$  min (major, 2*R*3*S*),  $t_R = 9.2$  min (minor, 2*S*3*R*); e.r. = > 99 : < 1.

fxm233 F2 4113a005.16.10.fid  
 AK Gansaeuer  
 Name Muehlhaus  
 fxm233 F2  
 Tag\_\_1H\_Standard C6D6 E:\\ gansaeue 5

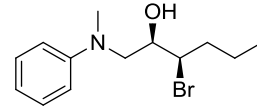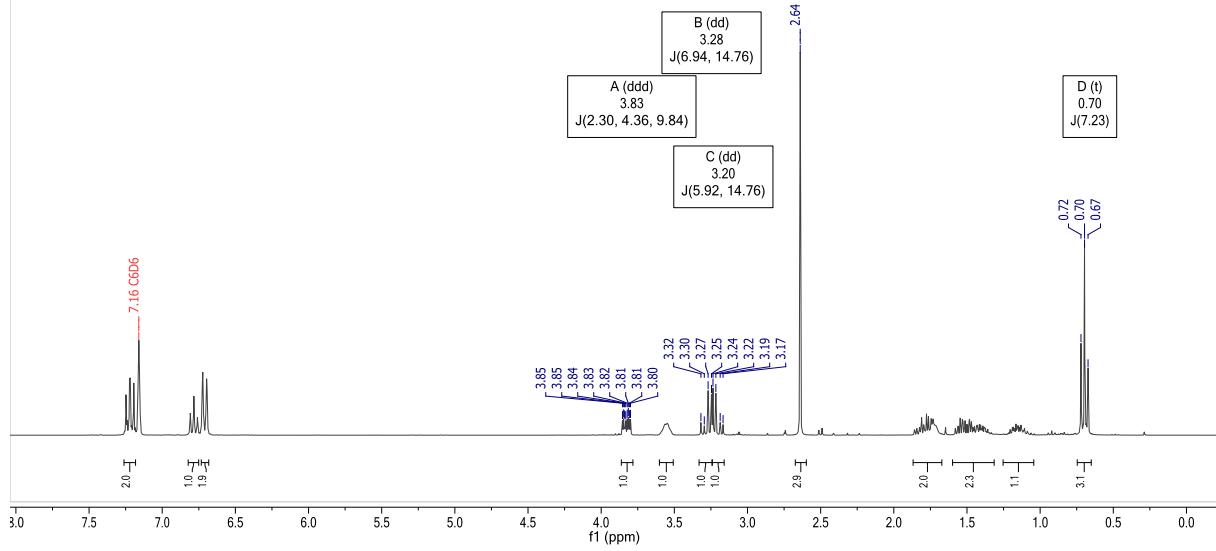

fxm233\_F2 4113a005.16.11.fid  
 AK Gansaeuer  
 Name Muehlhaus  
 fxm233 F2  
 Nacht\_13C\_cpd\_1k C6D6 E:\\ gansaeue 5

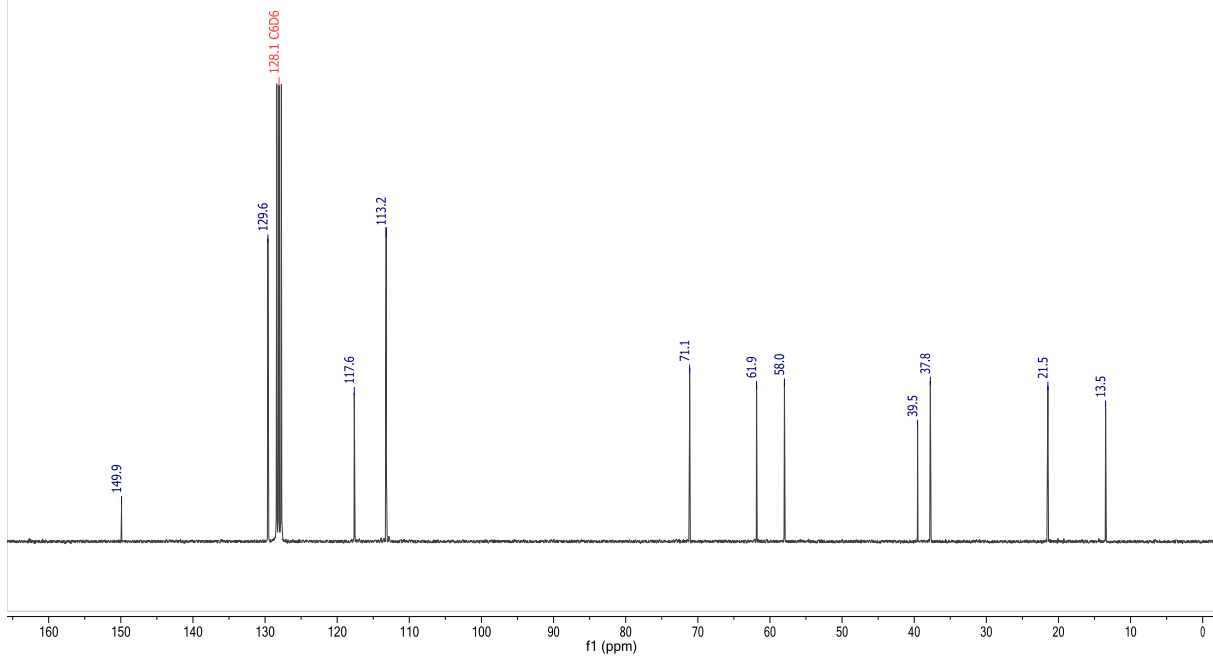

30I3b014.17.10.fid  
 AK Gansaeuer  
 Name Muehlhaus  
 fxm343\_C2F2 Sub1  
 Nacht\_\_1H\_Standard C6D6 E:\ gansaeue 14

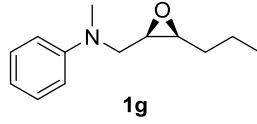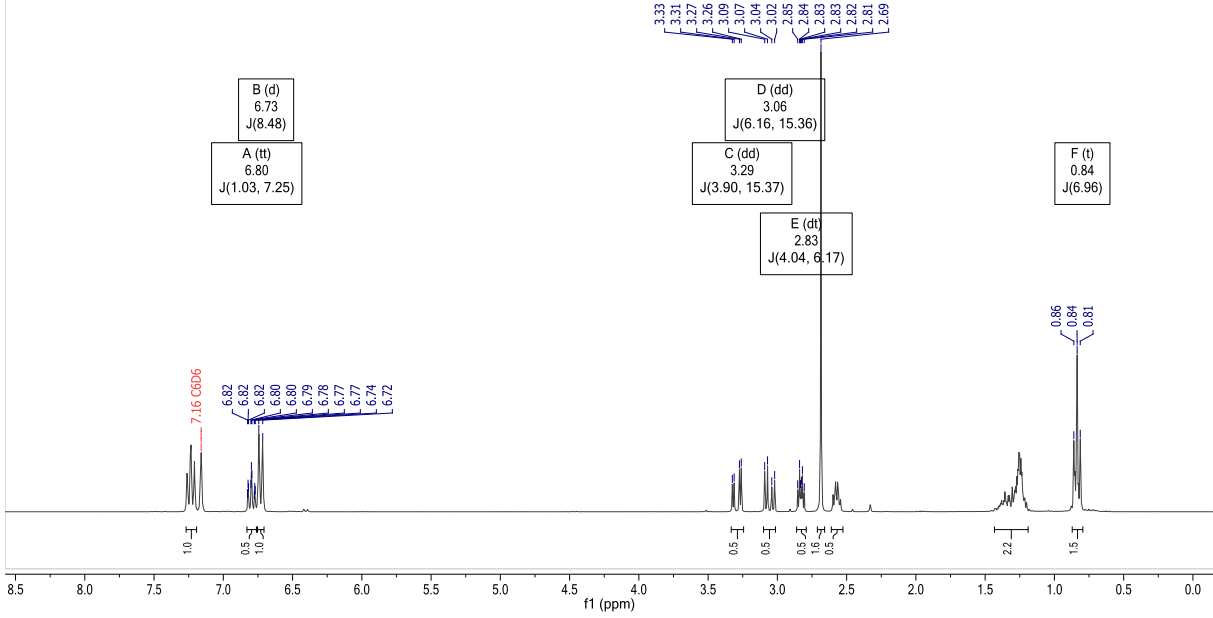

fxm203\_F1\_23I3c013.16.11.fid  
 AK Gansaeuer  
 Name Muehlhaus  
 fxm203\_F1 (R,R)-2,3-epoxy-1-(NMA)-hexan  
 Nacht\_13C\_cpds\_3k C6D6 E:\ gansaeue 13

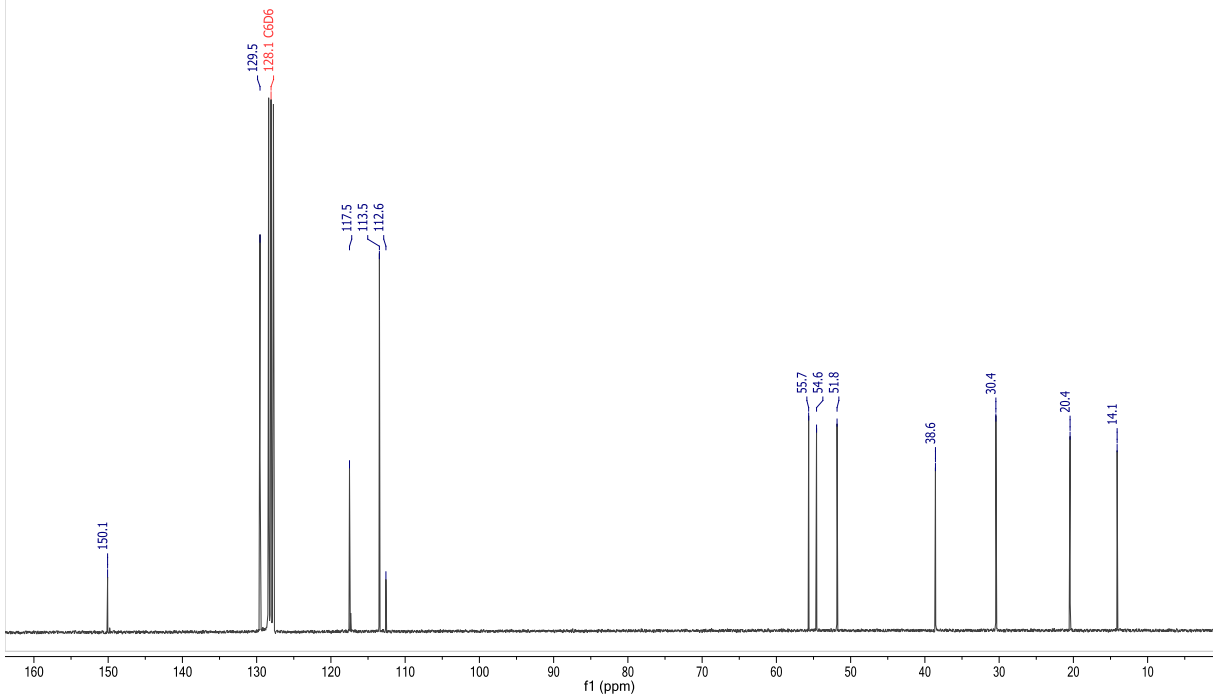

### 3.4.4. Synthesis of 4-chloro-*N*-methyl-*N*-(((2*R*,3*S*)-3-propyloxiran-2-yl)methyl)aniline (**1m**).

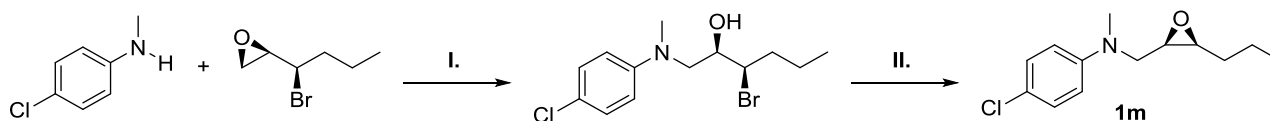

According to GP3b: **I.** aminolysis: 389 mg of 4-chloro-*N*-methylaniline (1.10 eq., 2.75 mmol), 448 mg (2*R*,3*R*)-3-bromo-1,2-epoxyhexane (1.00 eq., 2.50 mmol) and 250 mg SiO<sub>2</sub> are reacted for 2 days hours at RT (without solvent). Flash chromatography (SiO<sub>2</sub>, Eluent: Ch : Et<sub>2</sub>O = 95 : 5) yielded 360 mg (2*R*,3*R*)-3-bromo-1-(cyclohexyl(4-chloro-phenyl)amino)-hexan-2-ol (45%) as a colorless liquid. **II.** epoxide formation: 1.64 g of (2*R*,3*R*)-3-bromo-1-(cyclohexyl(4-chloro-phenyl)amino)-hexan-2-ol (1.00 eq., 5.13 mmol) and 1.42 g K<sub>2</sub>CO<sub>3</sub> (2.00 eq., 10.3 mmol) are reacted for 1 hour at 40 °C in MeOH. Flash chromatography (SiO<sub>2</sub>, Eluent: Ch : Et<sub>2</sub>O = 98 : 2) yielded 943 mg **1m** (77%) as a colorless liquid.

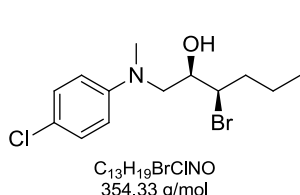

**R<sub>f</sub>** = 0.3 (20% Et<sub>2</sub>O in CH), **<sup>1</sup>H-NMR (500 MHz, C<sub>6</sub>D<sub>6</sub>, RT): δ [ppm]** = 0.71 (ddt, 3H, *J* = 7.3 Hz, *J* = 4.1 Hz, *J* = 1.9 Hz), 1.15 (dddd, 1H, *J* = 13.1 Hz, *J* = 9.9 Hz, *J* = 7.1 Hz, *J* = 5.3 Hz, *J* = 2.7 Hz), 1.41 (dtdd, 1H, *J* = 17.3 Hz, *J* = 7.1 Hz, *J* = 5.0 Hz, *J* = 2.3 Hz), 1.50 (dddd, 1H, *J* = 13.8 Hz, *J* = 6.5 Hz, *J* = 5.2 Hz, *J* = 3.9 Hz), 1.71-1.80 (m, 1H), 2.50 (s, 3H), 3.05-3.16 (m, 2H), 3.40-3.47 (m, 1H), 3.74 (dtd, 1H, *J* = 9.8 Hz, *J* = 4.3 Hz, *J* = 2.1 Hz), 6.38-6.43 (m, 2H), 7.16-7.19\* (m, 2H). **<sup>13</sup>C-NMR (75 MHz, C<sub>6</sub>D<sub>6</sub>, RT): δ [ppm]** = 13.5, 21.4, 37.6, 39.5, 57.8, 61.6, 71.0, 114.1, 122.6, 129.4, 148.3. **IR  $\tilde{\nu}$  [cm<sup>-1</sup>]** = 505, 627, 807, 1076, 1100, 1190, 1239, 1364, 1498, 1596. **HRMS (ESI):** *m/z* calculated for C<sub>13</sub>H<sub>20</sub>BrClNO<sup>+</sup>: 320.0419 u; found: 320.0411 u. **[ $\alpha$ ]<sub>D</sub><sup>20</sup>** = -28.4 (c 1.0, CHCl<sub>3</sub>).

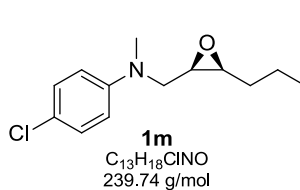

**R<sub>f</sub>** = 0.8 (40% EE in CH), **<sup>1</sup>H-NMR (500 MHz, C<sub>6</sub>D<sub>6</sub>, RT): δ [ppm]** = 0.84 (t, 3H, *J* = 7.1 Hz), 1.14-1.43 (m, 4H), 2.53 (s, 3H), 2.54-2.59 (m, 1H), 2.70 (dt, 1H, *J* = 6.4 Hz, *J* = 4.0 Hz, *J* = 1.7 Hz), 2.89 (dd, 1H, *J* = 15.4 Hz, *J* = 6.4 Hz), 3.12 (dd, 1H, *J* = 15.4 Hz, *J* = 3.8 Hz), 6.38-6.44 (m, 2H), 7.14-7.20 (m, 2H). **<sup>13</sup>C-NMR (125 MHz, C<sub>6</sub>D<sub>6</sub>, RT): δ [ppm]** = 14.1, 20.4, 30.8, 38.5, 51.8, 54.3, 55.6, 114.4, 122.2, 129.3, 148.5. **IR  $\tilde{\nu}$  [cm<sup>-1</sup>]** = 507, 629, 764, 808, 957, 1097, 1120, 1190, 1206, 1243, 1368, 1455, 1498, 1596, 2960. **HRMS (ESI):** *m/z* calculated for C<sub>13</sub>H<sub>19</sub>ClNO<sup>+</sup>: 240.1150 u, found: 240.1147 u. **[ $\alpha$ ]<sub>D</sub><sup>20</sup>** = -12.6 (c 0.5, CHCl<sub>3</sub>).

49p5a009.17.10.fid  
 Pollux Bruker AV III 500 MHz Prodigy  
 AK Prof. Gansaeuer  
 Name Muehlhaus  
 fxm405\_F2  
 \_1H\_Standard\_r C6D6 E:\\ Gansaeue 9

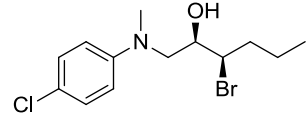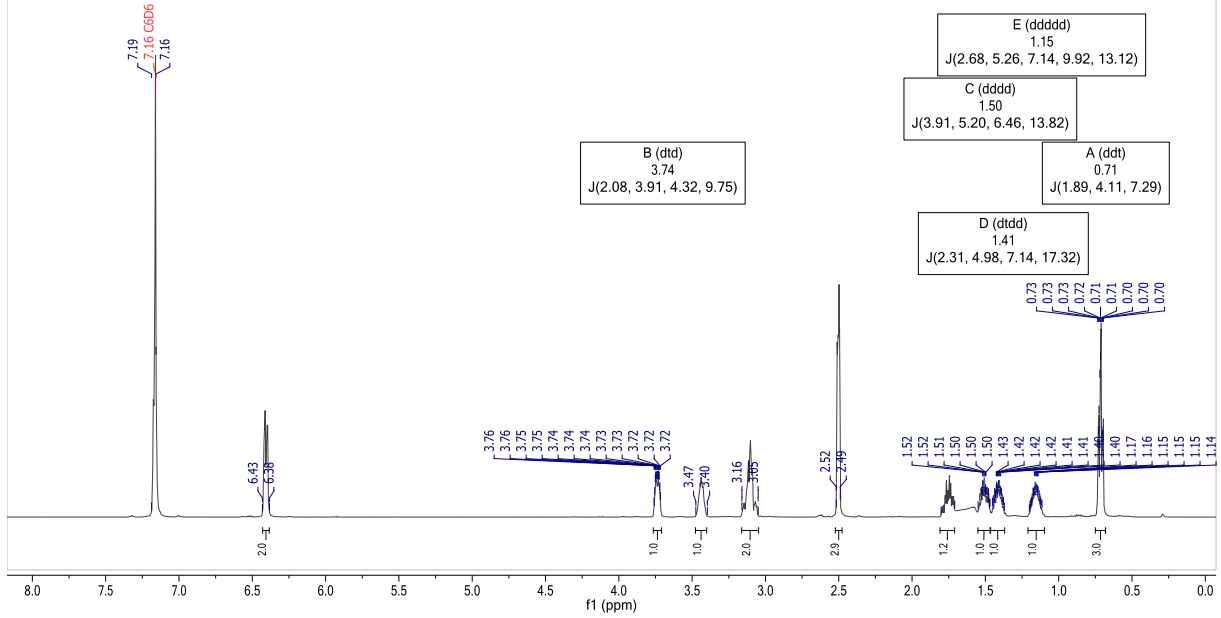

49i3a007.17.11.fid  
 AK Gansaeuer  
 Name Muehlhaus  
 fxm405\_F2 aminolysis pCl-NMA  
 Nacht\_13C\_cpd\_3k C6D6 E:\\ gansaeue 7

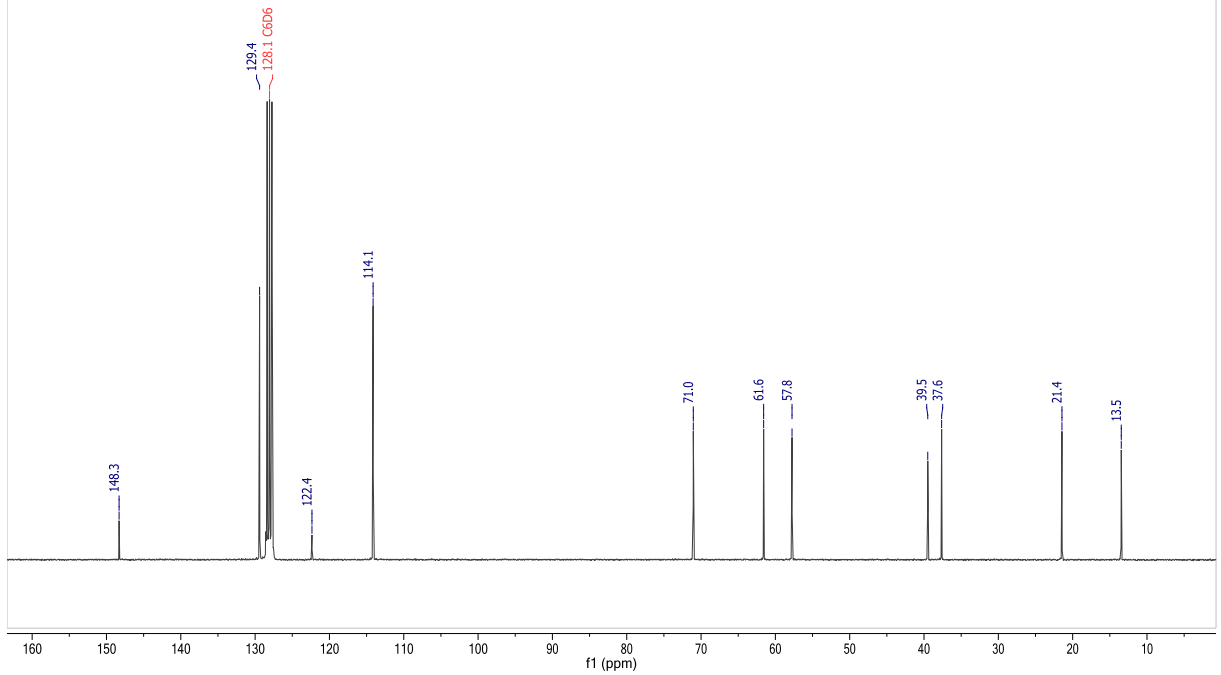

fxm256\_Fritte1 49I3a012.16.10.fid  
 AK Gansaeuer  
 Name Muehlhaus  
 fxm256\_Fritte1  
 Nacht\_\_1H\_Standard C6D6 E:\ gansaeue 12

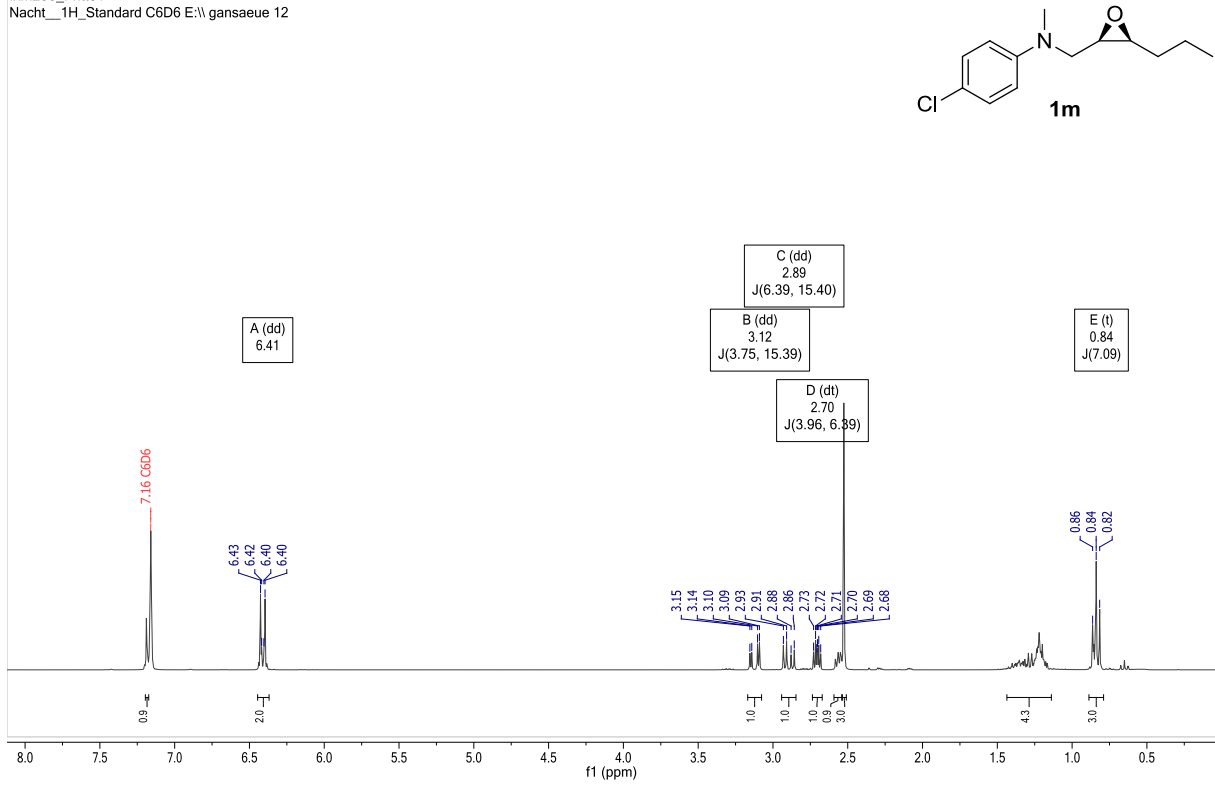

fxm256\_Fritte1 49I3a012.16.11.fid  
 AK Gansaeuer  
 Name Muehlhaus  
 fxm256\_Fritte1  
 Nacht\_13C\_cpd\_1k C6D6 E:\ gansaeue 12

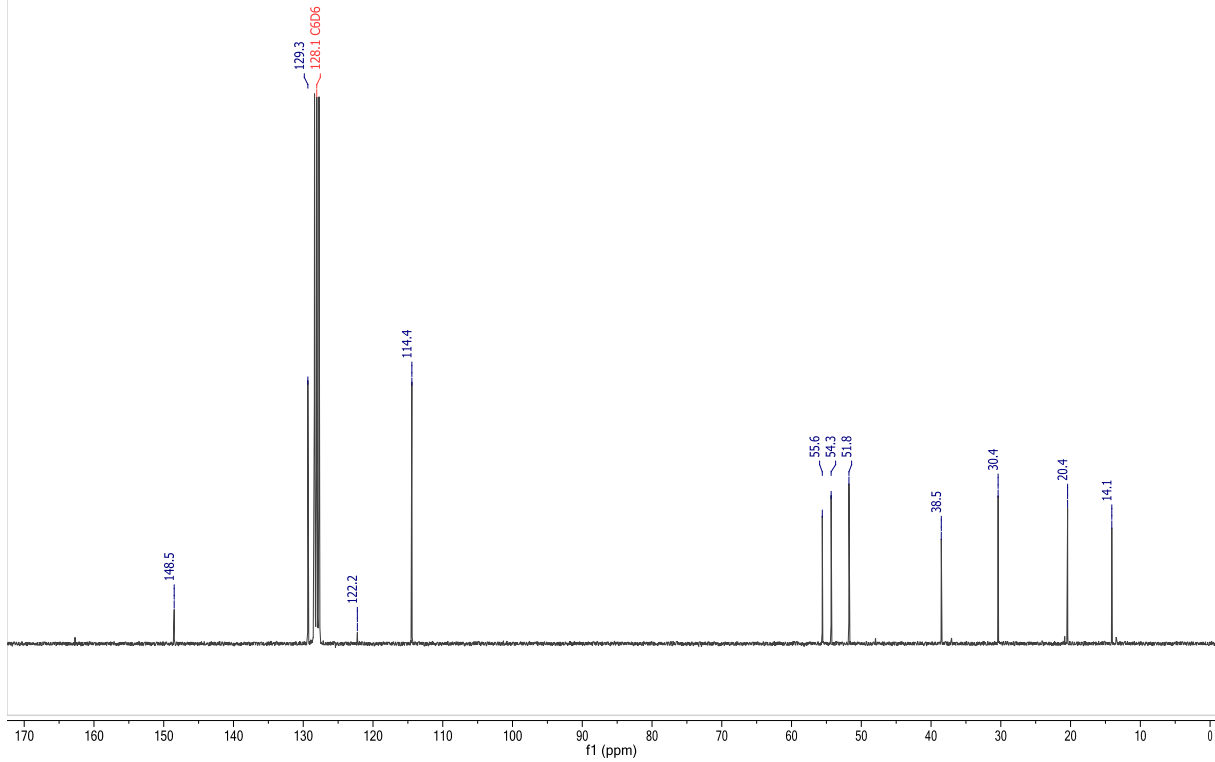

### 3.5.1. Synthesis of 4-iodo-N-methyl-N-(((2R,3S)-3-propyloxiran-2-yl)methyl)aniline (**1o**).

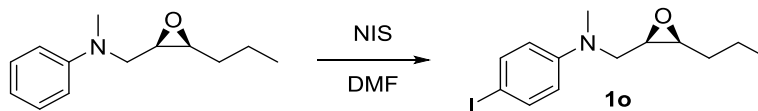

513 mg of **1g** (1.00 eq., 2.50 mmol) are dissolved in 3.0 mL DMF and cooled to 0 °C. Under vigorous stirring 563 mg *N*-iodosuccinimide NIS (1.00 eq., 2.50 mmol) is added in three portions after 0, 15 and 30 minutes. The mixture is stirred for 1 h at 0 °C and for 1 h at rt. The reaction is quenched by addition of 5 mL saturated Na<sub>2</sub>S<sub>2</sub>O<sub>3</sub>-solution and 10 mL cyclohexane are added. After phase separation the aqueous-solution is extracted with cyclohexane (4 \* 15 mL cyclohexane). The combined organic solutions are washed with H<sub>2</sub>O (2 \* 5 mL) and brine (1 \* 5 mL) and dried under Na<sub>2</sub>SO<sub>4</sub>. After removal of solvents under reduced pressure, the crude product is purified by flash chromatography (SiO<sub>2</sub>, Eluent: CH : MTBE = 95 : 5) to yield 643 mg **1o** (78%) as a colorless solution.

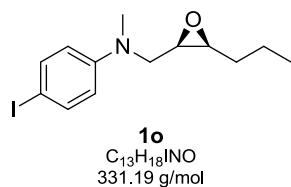

$R_f = 0.8$  (40% EE in CH), <sup>1</sup>H-NMR (300 MHz, C<sub>6</sub>D<sub>6</sub>, RT):  $\delta$  [ppm] = 0.83 (t, 3H,  $J = 7.1$  Hz), 1.12-1.45 (m, 4H), 2.49 (s, 3H), 2.68 (dt, 1H,  $J = 6.4$  Hz,  $J = 4.0$  Hz), 2.86 (dd, 1H,  $J = 15.4$  Hz,  $J = 6.4$  Hz), 3.10 (dd, 1H,  $J = 15.4$  Hz,  $J = 3.7$  Hz), 6.22-6.29 (m, 2H), 7.44-7.51 (m, 2H). <sup>13</sup>C-NMR (75 MHz, C<sub>6</sub>D<sub>6</sub>,

RT):  $\delta$  [ppm] = 14.1, 20.4, 30.4, 38.3, 51.5, 54.3, 55.6, 78.3, 115.5, 138.1, 149.3. IR  $\tilde{\nu}$  [cm<sup>-1</sup>] = 505, 754, 803, 957, 1119, 1203, 1243, 1314, 1368, 1456, 1496, 1587, 2959. HRMS (ESI):  $m/z$  calculated for C<sub>13</sub>H<sub>19</sub>INO<sup>+</sup>: 332.0506 u, found: 332.0503 u.  $[\alpha]_D^{20} = -10.8$  (c 0.5, CHCl<sub>3</sub>).

26I3d027.17.10.fid  
 AK Gansaeuer  
 Name Muehlhaus  
 fxm289\_F1 pl-Substrat  
 Tag\_\_1H\_Standard C6D6 E:\\ gansaeue 27

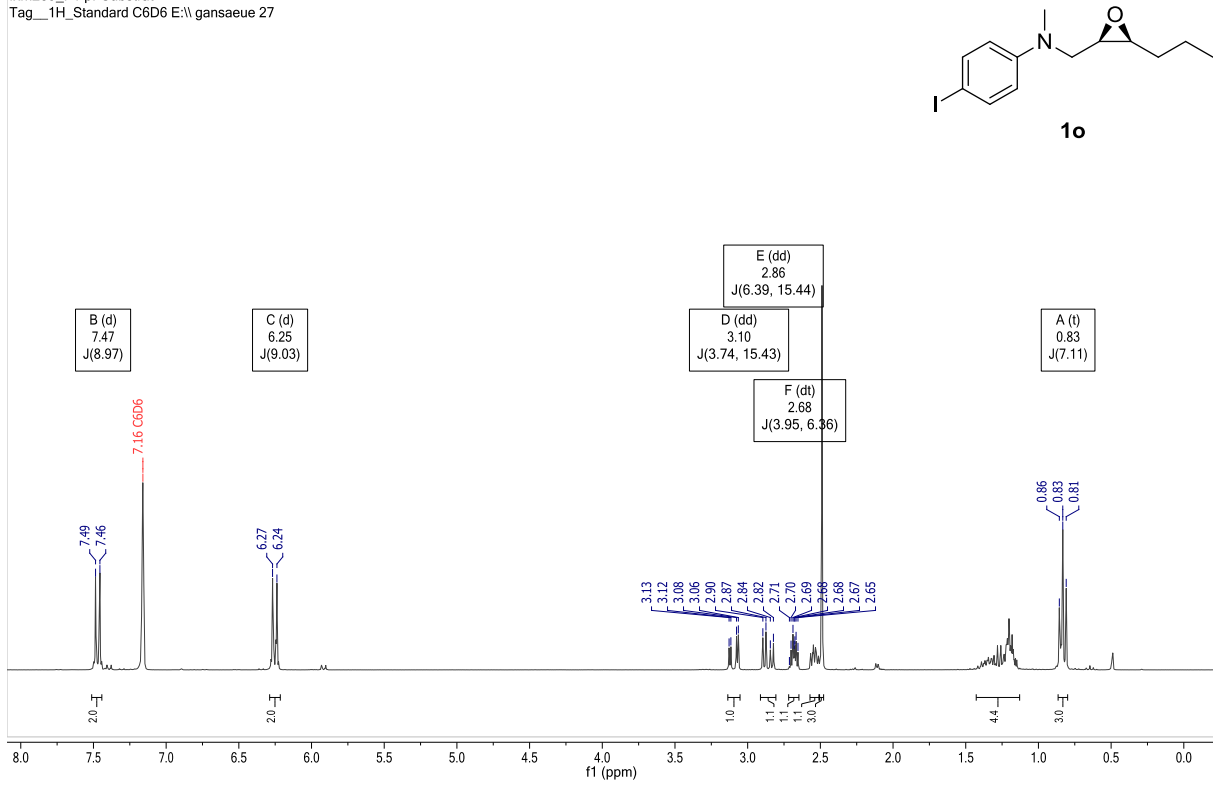

26I3d027.17.11.fid  
 AK Gansaeuer  
 Name Muehlhaus  
 fxm289\_F1 pl-Substrat  
 Nacht\_13C\_cpd\_3k C6D6 E:\\ gansaeue 27

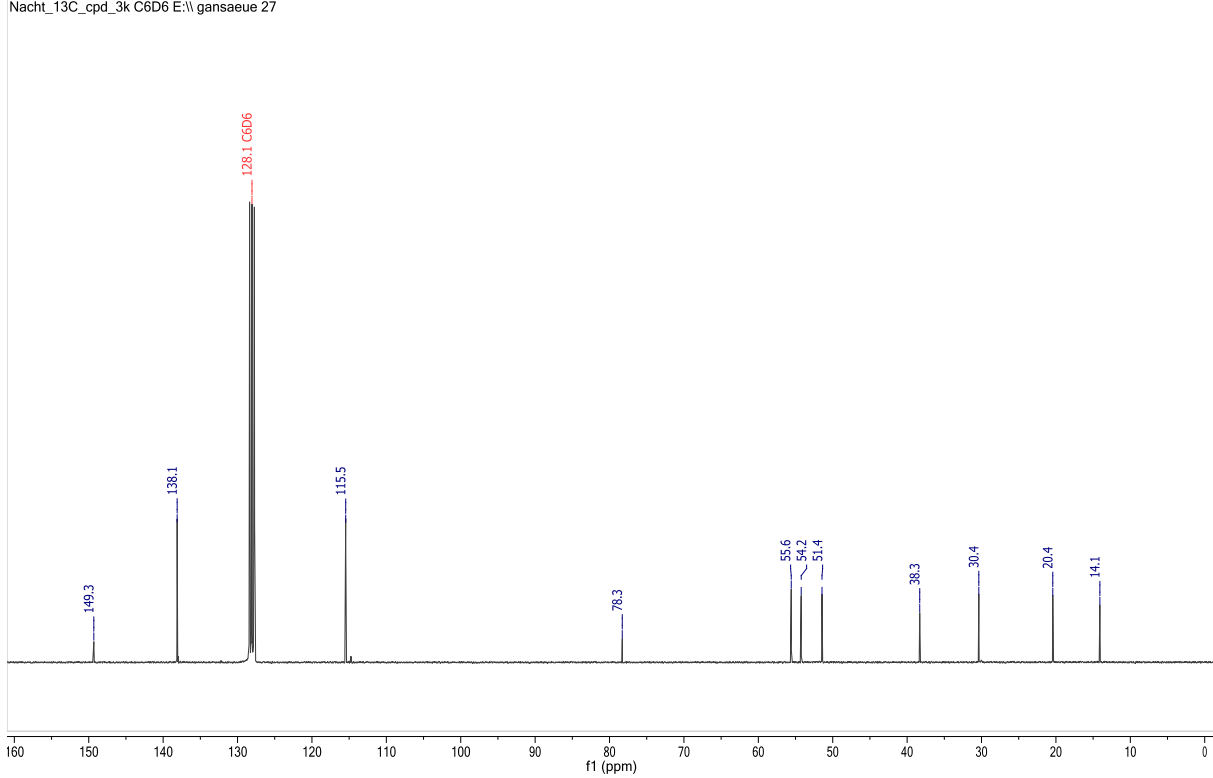



### 3.5.2 Synthesis of *N*-cyclohexyl-4-iodo-*N*-(((2*R*,3*S*)-3-propyloxiran-2-yl)methyl)aniline (**1p**).

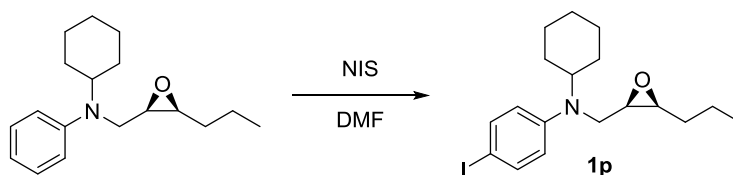

273 mg of **1d** (1.00 eq., 1.0 mmol) are dissolved in 1.5 mL DMF and cooled to 0 °C. Under vigorous stirring 225 mg *N*-iodosuccinimide NIS (1.00 eq., 1.0 mmol) is added in three portions after 0, 15 and 30 minutes. The mixture is stirred for 1 h at 0 °C and for 1 h at rt. The reaction is quenched by addition of 2 mL saturated NaHSO<sub>3</sub>-solution and 5 mL cyclohexane are added. After phase separation the aqueous layer is extracted with cyclohexane (4 \* 10 mL cyclohexane). The combined organic extracts are washed with H<sub>2</sub>O (2 \* 5 mL) and brine (1 \* 5 mL) and dried over Na<sub>2</sub>SO<sub>4</sub>. After removal of solvents under reduced pressure, the crude product is purified by flash chromatography (Al<sub>2</sub>O<sub>3</sub>, Eluent: CH : MTBE = 98 : 2) to yield 389 mg **1p** (97%) as a light yellow oil.

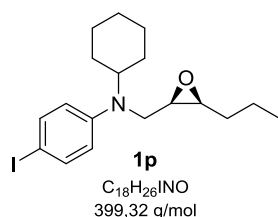

$R_f = 0.4$  (10% MTBE in CH); <sup>1</sup>H NMR (400.1 MHz, C<sub>6</sub>D<sub>6</sub>, RT)  $\delta$  [ppm]= 0.83-0.97 (m, 4H), 1.01-1.51 (m, 9H), 1.54-1.64 (m, 3H), 1.73 (dtt,  $J = 12.3$  Hz,  $J = 3.4$  Hz,  $J = 1.7$  Hz, 1H), 2.65 (ddd,  $J = 6.6$  Hz,  $J = 5.2$  Hz,  $J = 4.1$  Hz, 1H), 2.73 (ddd,  $J = 5.2$  Hz,  $J = 4.1$  Hz,  $J = 2.8$  Hz, 1H), 2.99 (dd,  $J = 16.2$  Hz,  $J = 5.2$  Hz, 1H), 3.23-3.34 (m, 2H), 6.50-6.56 (m, 2H), 7.48-7.55 (m, 2H); <sup>13</sup>C NMR (101 MHz, C<sub>6</sub>D<sub>6</sub>, RT)  $\delta$  [ppm]= 14.1, 20.5, 26.3, 26.2, 26.4, 30.6, 30.7, 31.3, 44.2, 56.4, 56.6, 57.5, 78.0, 116.1, 138.4, 148.8; IR (KBr)  $\nu_{max}$  (neat)[cm<sup>-1</sup>]= 767, 801, 1007, 1148, 1173, 1234, 1282, 1348, 1361, 1450, 1491, 1584, 2854, 2928; HRMS (ESI)  $m/z$  calculated for [M+H]<sup>+</sup> 400.1132 u found 400.1128 u;  $\alpha_D^{20}$ (CHCl<sub>3</sub>)= -18.6°.

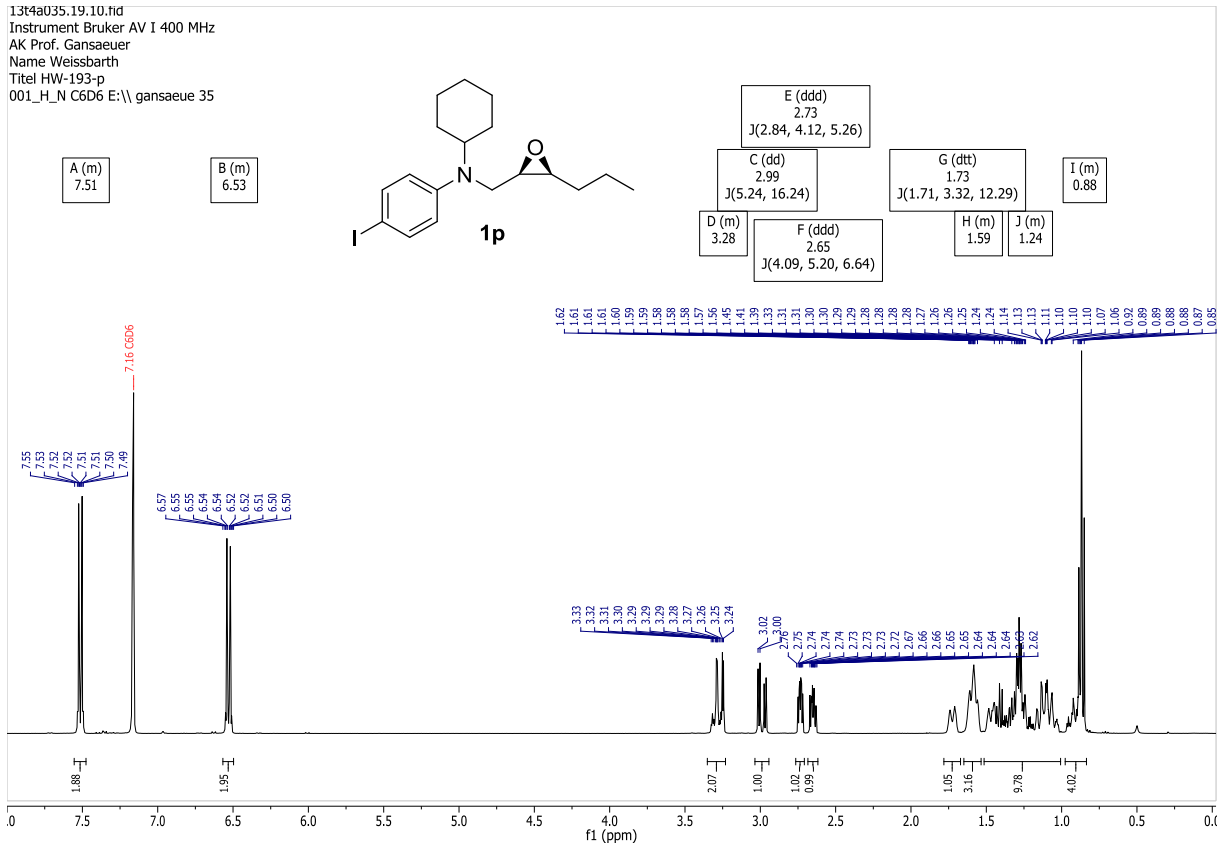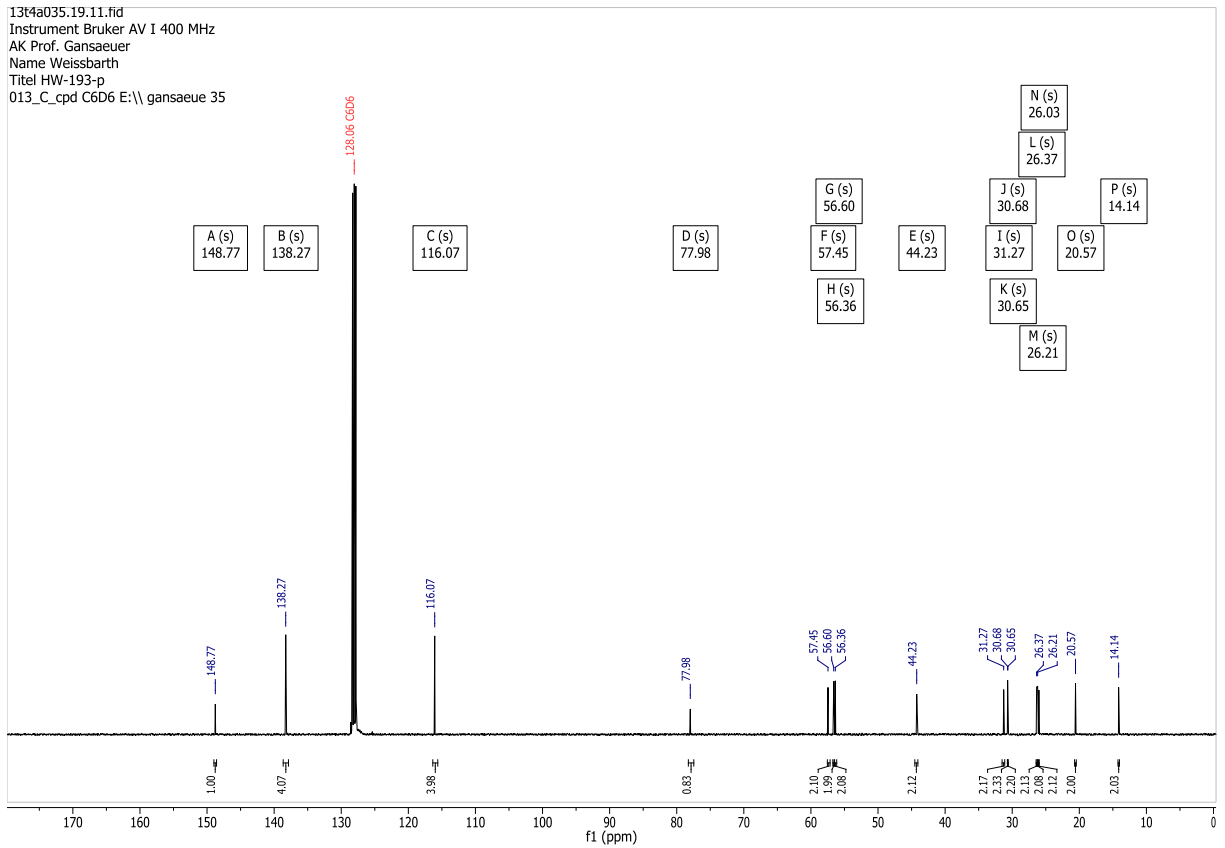

4. REO-ArS<sub>R</sub>4.1 Investigation of different catalysts for the REO-ArS<sub>R</sub> with epoxide **1a**.

**Table 1.** Investigation on the performance of different catalysts in the REO-ArS<sub>R</sub> of **1a**. Reaction conditions: 10 mol% catalyst, 30 mol% Zn, entries 1,3,4,: 30 mol% Lut·HCl, 0.2 M in THF, 48 h, rt. Regioisomeric ratios (*r.r.*) and diastereoisomeric ratios (*d.r.*) were determined by integration of the signals of the C-OH-group in the <sup>13</sup>C-NMR of the crude-mixture. [a]: *d.r.* (**2a**) = *cis*-**2a** : *trans*-**2a**; [b]: *d.r.* (**3a**) = (*R,S*)-**3a** : (*S,S*)-**3a**; signals of the C-OH-group: *cis*-**2a** 67.3 ppm, *trans*-**2a** 67.9 ppm, (*R,S*)-**3a** 72.1 ppm, (*S,S*)-**3a** 73.9 ppm. n.d. = not determined.

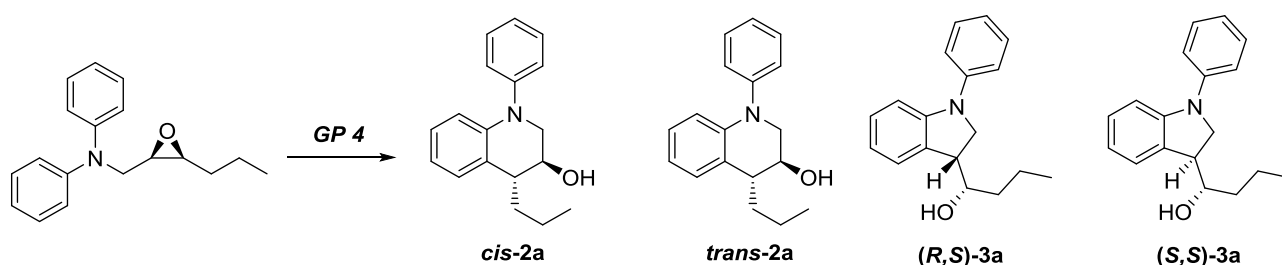

|          | catalyst                                  | conversion<br>of <b>1a</b> in % | <i>r.r.</i><br><b>2a</b> : <b>3a</b> | <i>d.r.</i> <sub>2a</sub> <sup>[a]</sup> | <i>yield 2a</i><br>( <i>d.r.</i> <sub>2a</sub> isolated) | <i>d.r.</i> <sub>3a</sub> <sup>[b]</sup> | <i>yield 3a</i><br>( <i>d.r.</i> <sub>3a</sub> isolated) |
|----------|-------------------------------------------|---------------------------------|--------------------------------------|------------------------------------------|----------------------------------------------------------|------------------------------------------|----------------------------------------------------------|
| <b>1</b> | <b>Cp<sub>2</sub>Ti-Cl<sub>2</sub></b>    | > 98                            | 78 : 22                              | 31 : 69                                  | -                                                        | 90 : 10                                  | -                                                        |
| <b>2</b> | <b>Cp<sub>2</sub>Ti-(OTs)<sub>2</sub></b> | 93                              | 79 : 21                              | 25 : 75                                  | -                                                        | 90 : 10                                  | -                                                        |
| <b>3</b> | <b>ent-Kat-Cl<sub>2</sub></b><br>(5 mol%) | > 98                            | 10 : 90                              | n.d.                                     | -                                                        | 92 : 8                                   | 72%<br>(>98 : <2)                                        |
| <b>4</b> | <b>Kat-Cl<sub>2</sub></b>                 | > 98                            | 93 : 7                               | 33 : 67                                  | 72%<br>(15 : 85)                                         | n.d.                                     | -                                                        |
| <b>5</b> | <b>Kat-(OTs)<sub>2</sub></b>              | > 98                            | 94 : 6                               | 24 : 76                                  | 73%<br>(10 : 90)                                         | n.d.                                     | -                                                        |

## 4.2 Structural assignment of the tetrahydroquinoline-scaffold and configurational analysis with tetrahydroquinolines **2a** and **2g**.

The constitution of the THQ scaffold was elucidated by single crystal X-ray diffraction of purified N-methyl-tetrahydroquinoline **2g** (pure *trans*-isomer: **trans-2g**). The X-ray also revealed the *trans*-configuration and the axial orientation of the hydroxy group in the pseudo-chairlike 1,2,3,4-tetrahydro-pyridine ring of the THQ **2g**.

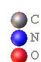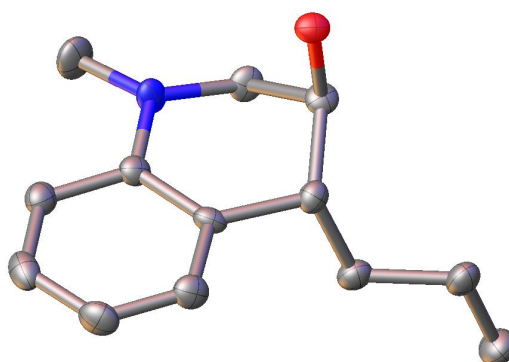

In the  $^1\text{H-NMR}$ -spectra of *cis-2g* and *trans-2g*, the signal of the equatorially oriented proton  $\text{H}_a$  features three types of couplings: the geminal  $^2J$ -coupling to  $\text{H}_{a'}$ , the  $^3J$ -coupling to  $\text{H}_b$  and the  $^4J$ - or so called 'W-coupling' to  $\text{H}_c$ . The signal of  $\text{H}_{a'}$  does not feature the 'W-coupling' and is therefore easily identified. In *cis-2g* as well as in *trans-2g*  $\text{H}_{a'}$  shows a  $^3J$ -coupling with  $\text{H}_b$ . In the case of *cis-2g*,  $\text{H}_{a'}$  and  $\text{H}_b$  are *trans* to each other leading to a large  $^3J^{\text{trans}}$  of 6.0 Hz. In the case of *trans-2g*,  $\text{H}_{a'}$  and  $\text{H}_b$  are *cis* to each other leading to a small  $^3J^{\text{cis}}$  of 2.5 Hz.

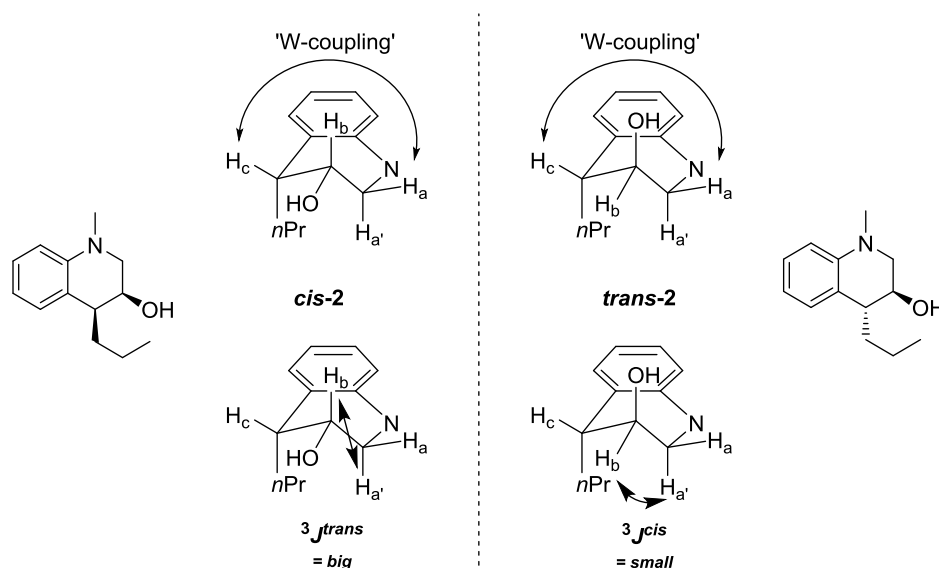

06f3c003.18.10.fid  
 AK Gansaeuer  
 Name Muehlhaus  
 cis-THQ-02.2018  
 Nacht\_\_1H\_Standard C6D6 E:\\ gansaeue 3

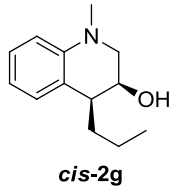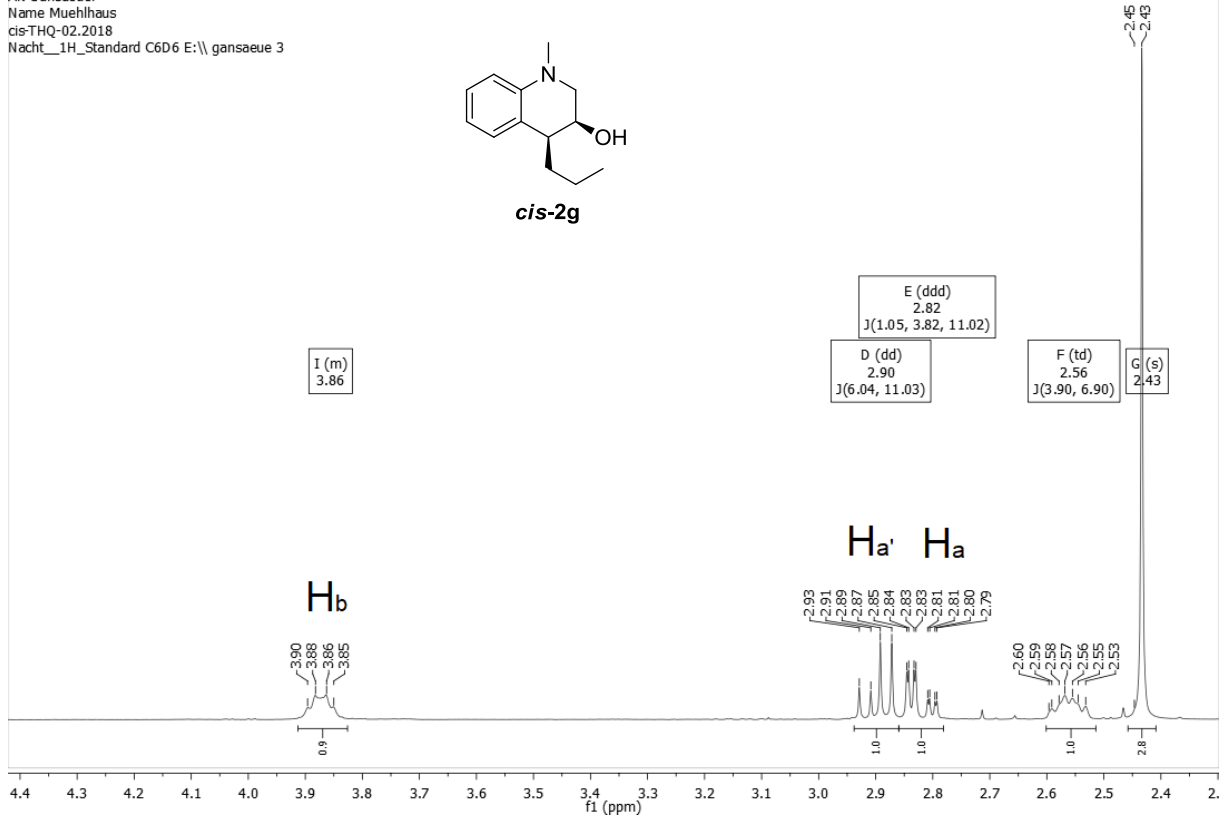

03c5a041.18.10.fid  
 Instrument Bruker Avance I 500 MHz  
 AK Prof. Gansaeuer  
 Name Muehlhaus  
 THQ-III  
 001\_H\_Standard C6D6 E:\\ gansaeue 41

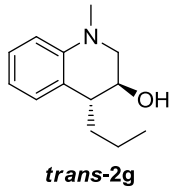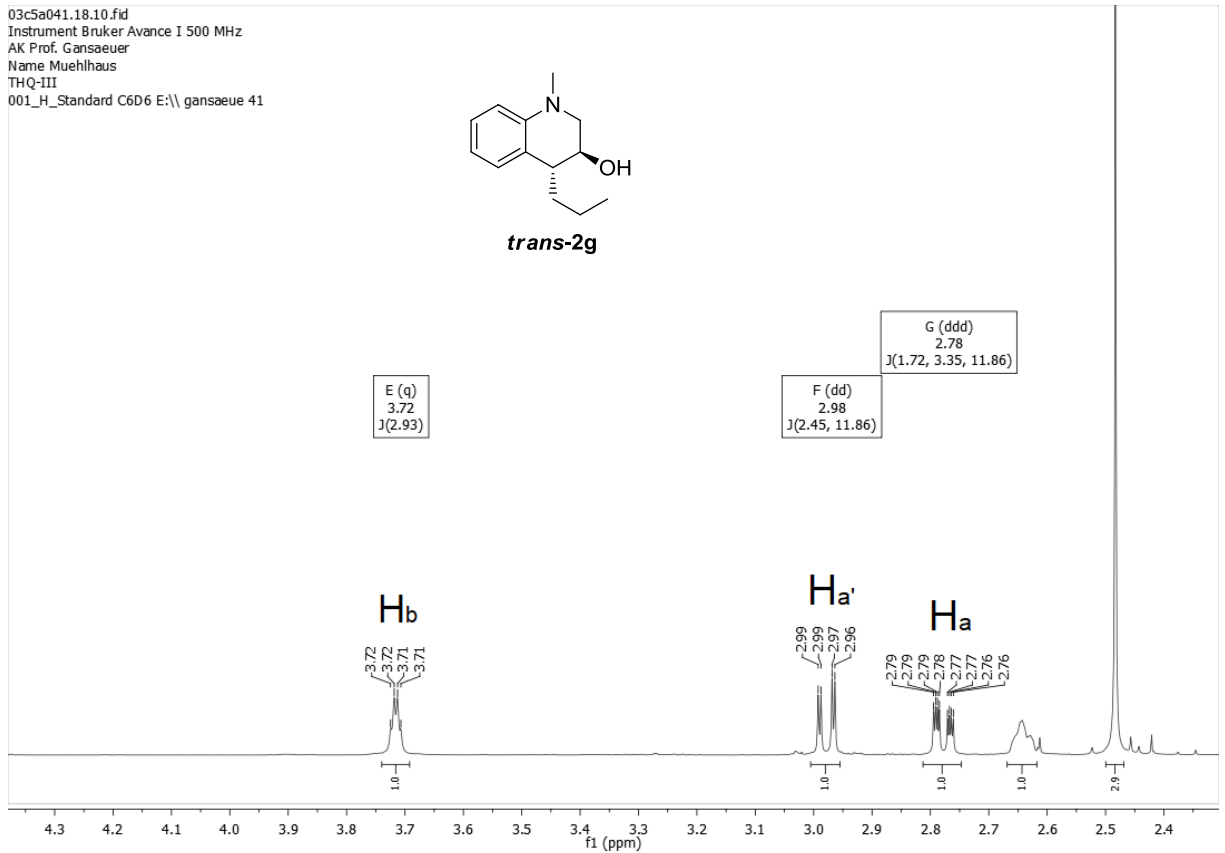

In addition to THQ **2g**, the coupling behavior of *N*-phenyl-substituted tetrahydroquinoline **2a** is very similar. For the mainly occurring isomer **trans-2a**, the  $^3J$  coupling constant between  $H_a$  and  $H_b$  is small, while it is big for the side product **cis-2a**.

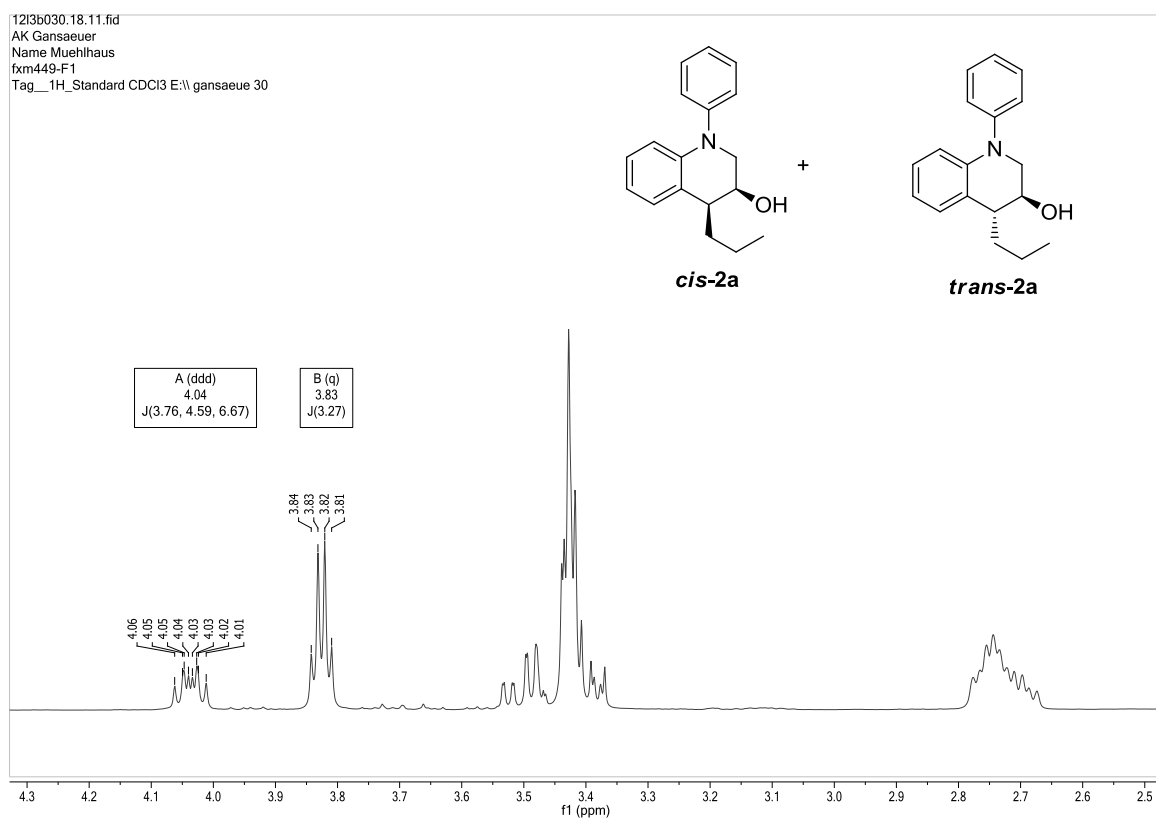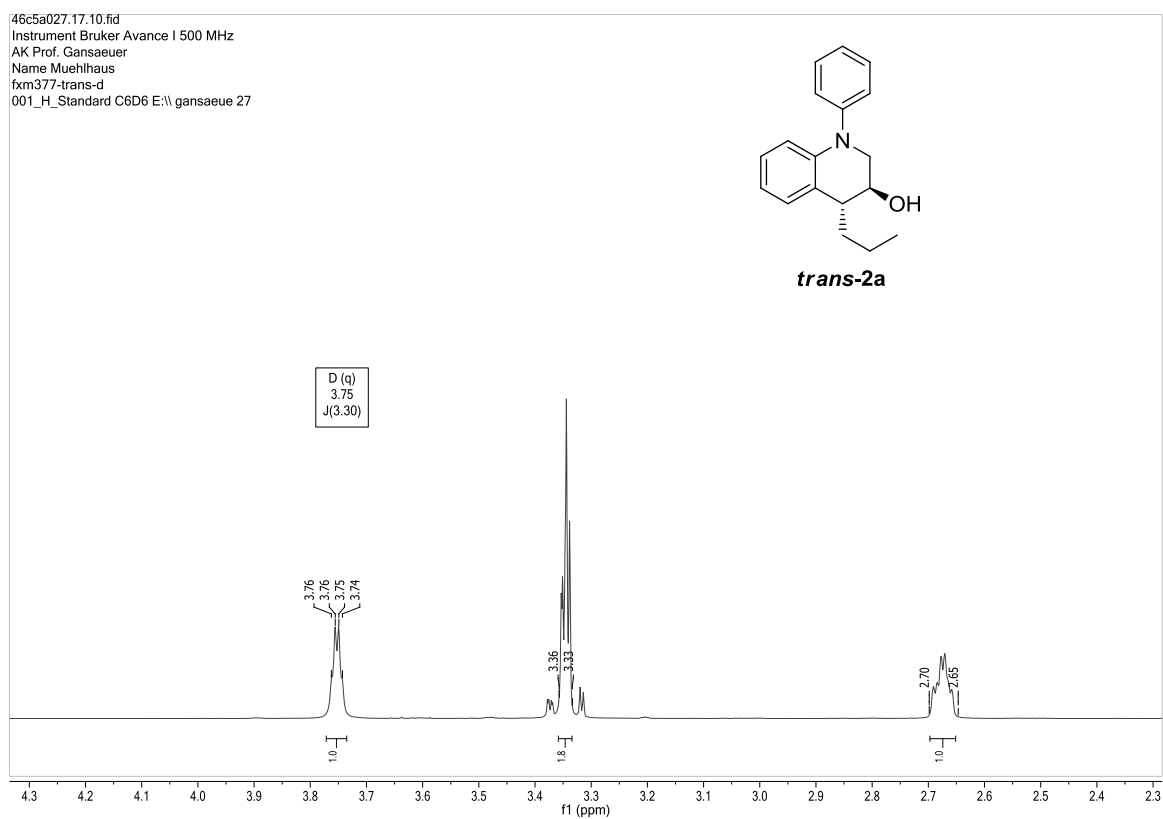

### 4.3 Synthesis of tetrahydroquinolines by REO-ArS<sub>R</sub>

#### 4.3.1 Synthesis of (3*S*,4*R*)-1-Phenyl-4-propyl-1,2,3,4-tetrahydroquinoline-3-ol (**2a**).

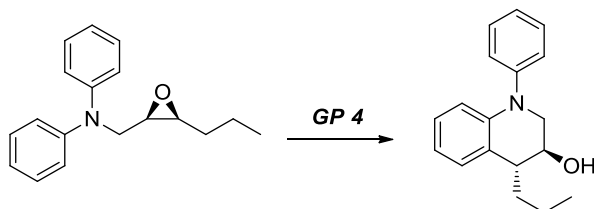

According to GP4: 134 mg of **1a** (1.00 eq., 0.50 mmol), 10 mg zinc (0.30 eq., 0.15 mmol) and 40 mg **cat-(OTs)<sub>2</sub>** (0.10 eq., 0.05 mmol) are reacted in dry THF for 48 hours at room temperature. Regio- and diastereoisomeric ratio were determined by <sup>13</sup>C-NMR of the crude product. Flash chromatography (SiO<sub>2</sub>, Eluent: Ch : Mtbe = 87 : 13) yielded 98 mg **2a** (d.r. = 90 : 10, 73%) as a viscous, colorless liquid.

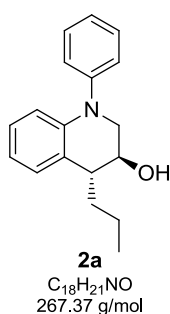

**R<sub>f</sub>** = 0.63 (40% EE in Ch), **<sup>1</sup>H-NMR (500 MHz, C<sub>6</sub>D<sub>6</sub>, RT): δ [ppm]** = 0.82 (t, 3H, *J* = 7.1 Hz), 1.20-1.45 (m, 4H), 1.65-1.75 (s<sub>br</sub>, 1H), 2.65-2.70 (m, 1H), 3.33-3.36 (m, 2H), 3.75 (dd, 1H, *J* = 3.3 Hz, *J* = 3.1 Hz), 6.76 (td, 1H, *J* = 7.3 Hz, *J* = 1.3 Hz), 6.85 (dd, 1H, *J* = 8.3 Hz, *J* = 1.3 Hz), 6.88-6.91 (m, 1H), 6.92-6.96 (m, 1H), 7.01 (dd, 1H, *J* = 7.5 Hz, *J* = 1.6 Hz), 7.07-7.11 (m, 2H), 7.11-7.15 (m, 2H). **<sup>13</sup>C-NMR (75 MHz, C<sub>6</sub>D<sub>6</sub>, RT): δ [ppm]** = 14.4, 20.5, 38.8, 45.3, 53.5, 67.6, 116.0, 119.1, 124.3, 125.3, 125.6, 127.3, 129.8, 131.3, 143.3, 148.3. **IR (Film)  $\tilde{\nu}$  [cm<sup>-1</sup>]** = 461, 499, 559, 610, 698, 745, 957, 1061, 1094, 1127, 1204, 1239, 1299, 1377, 1492, 1574, 1592, 2870, 2927, 2956. **HRMS (ESI): *m/z*** calculated for C<sub>18</sub>H<sub>22</sub>NO<sup>+</sup>: 268.1696 u, found: 268.1699 u. **[ $\alpha$ ]<sub>D</sub><sup>20</sup>** = -43.2 (c 0.25, CHCl<sub>3</sub>). determination of d.r. (**2a**, isolated) by HPLC: *Knauer Eurospher II 100-2 C18*, H<sub>2</sub>O/MeCN (65 : 35), flowrate 0.6 mL/min; *t<sub>R</sub>* = 2.8 min (major, *trans*), *t<sub>R</sub>* = 1.5 min (minor, *cis*), d.r. = 90 : 10. determination of *e.r.* (**2a**, isolated) by HPLC: *DAICEL Chiralpak IC-U01*; *n*Hexane/*i*PrOH (95 : 5); flowrate 0.43 mL/min; *t<sub>R</sub>* = 1.5 min (major, 3*S*,4*R*), *t<sub>R</sub>* = 2.0 min (minor, 3*R*,4*S*), *e.r.* = > 99 : < 1.

46c5a027.17.10.fid  
Instrument Bruker Avance I 500 MHz  
AK Prof. Gansaeuer  
Name Muehlhaus  
fsm377-trans-d  
001\_H\_Standard C6D6 E:\\ gansaeue 27

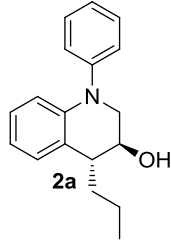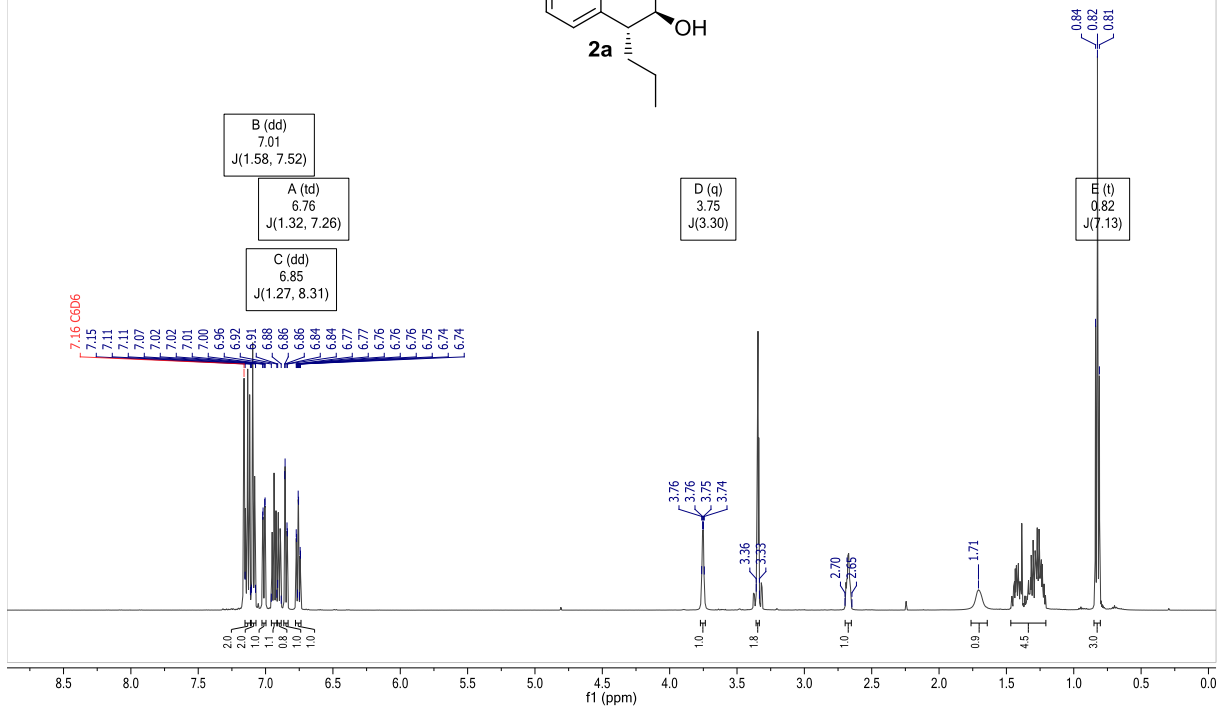

46c5a027.17.11.fid  
Instrument Bruker Avance I 500 MHz  
AK Prof. Gansaeuer  
Name Muehlhaus  
fsm377-trans-d  
013\_C\_cpd\_N C6D6 E:\\ gansaeue 27

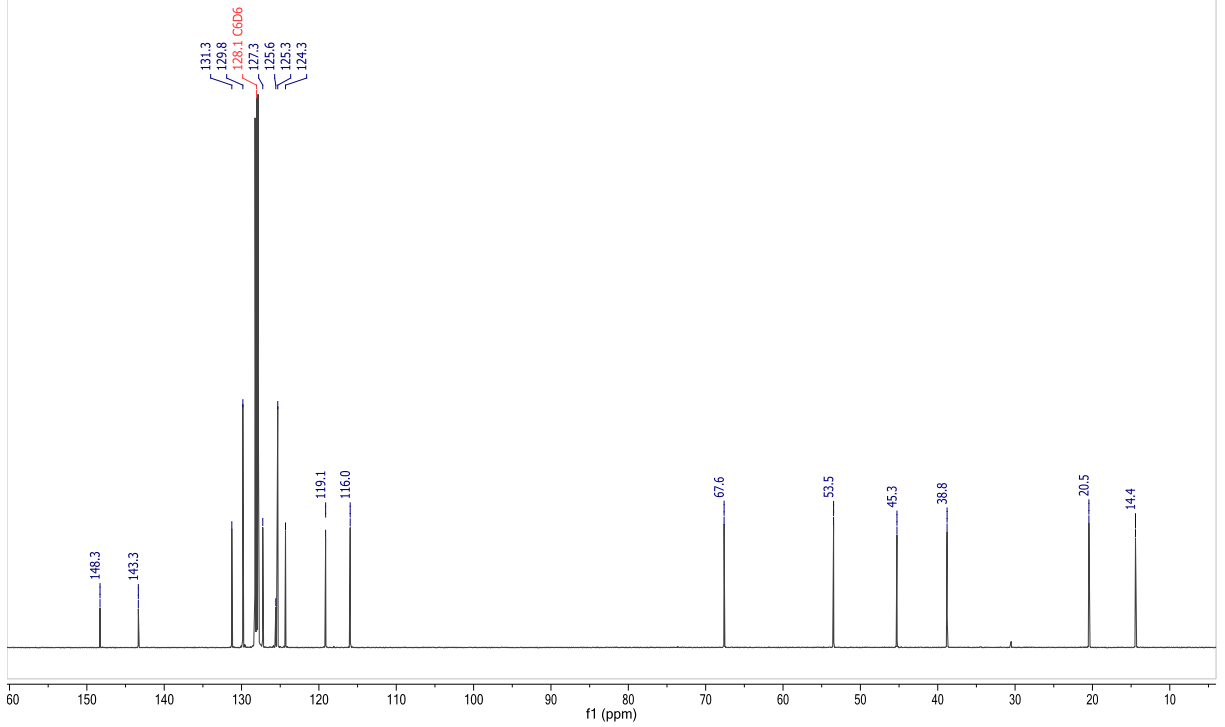



### 4.3.2 Synthesis of (3*S*,4*R*)-4-isobutyl-1-phenyl-4-propyl)-1,2,3,4-tetrahydroquinoline-3-ol (2c).

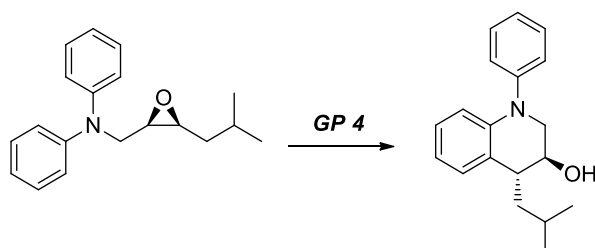

According to GP4: 141 mg of **1c** (1.00 eq., 0.50 mmol), 10 mg zinc (0.30 eq., 0.15 mmol) and 40 mg **cat-(OTs)<sub>2</sub>** (0.10 eq., 0.05 mmol) are reacted in dry THF for 48 hours at room temperature. Regio- and diastereoisomeric ratio were determined by <sup>13</sup>C-NMR of the crude product. Flash chromatography (SiO<sub>2</sub>, Eluent: Ch : Mtbe = 87 : 13) yielded 104 mg **2c** (d.r. = 81 : 19, 74%) as a viscous, colorless liquid.

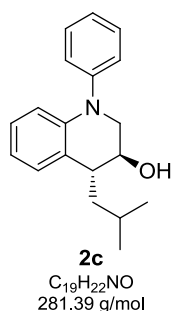

$R_f = 0.25$  (30% Et<sub>2</sub>O in Ch), <sup>1</sup>H-NMR (500 MHz, C<sub>6</sub>D<sub>6</sub>, RT):  $\delta$  [ppm] = 0.86 (d, 6H,  $J = 6.5$  Hz), 1.10-1.20 (m, 1H), 1.63 (sept., 1H,  $J = 6.5$  Hz), 2.83 (td, 1H,  $J = 7.4$  Hz,  $J = 2.8$  Hz), 3.30-3.37 (m, 2H), 3.76 (d, 1H,  $J = 4.0$  Hz), 6.76 (td, 1H,  $J = 7.3$  Hz,  $J = 1.3$  Hz), 6.74-6.79 (m, 1H), 6.96-6.84 (m, 3H), 7.02-7.14 (m, 4H). <sup>13</sup>C-NMR (75 MHz, C<sub>6</sub>D<sub>6</sub>, RT):  $\delta$  [ppm] = 22.7, 23.1, 25.2, 43.0, 46.7, 53.1, 67.7, 115.9, 119.2, 123.5, 124.4, 125.4, 127.3, 129.9, 131.3, 143.3, 148.3. IR (Film)  $\tilde{\nu}$  [cm<sup>-1</sup>] = 698, 745, 1037, 1063, 1205, 1242, 1274, 1302, 1462, 1493, 1574, 1592, 2953. HRMS (ESI):  $m/z$  calculated for C<sub>19</sub>H<sub>24</sub>NO<sup>+</sup>: 282.1852 u, found: 282.1849 u. [ $\alpha$ ]<sub>D</sub><sup>20</sup> = -47.0 (c 1.00, CHCl<sub>3</sub>).

4713b006.18.10.fid  
AK Gansaeuer  
Name Muehlhaus  
fxm468\_F2 iBu-THQ  
Nacht\_1H\_Standard C6D6 E:\ gansaeue 6

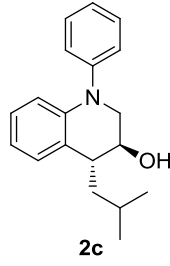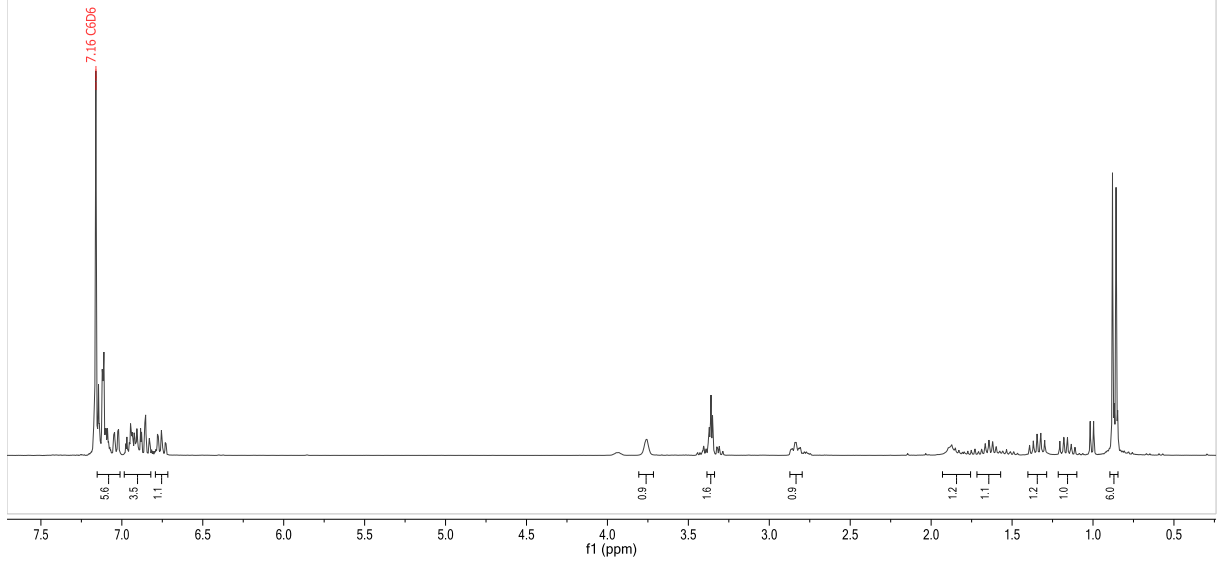

4713b006.18.11.fid  
AK Gansaeuer  
Name Muehlhaus  
fxm468\_F2 iBu-THQ  
Nacht\_13C\_cpd\_3k C6D6 E:\ gansaeue 6

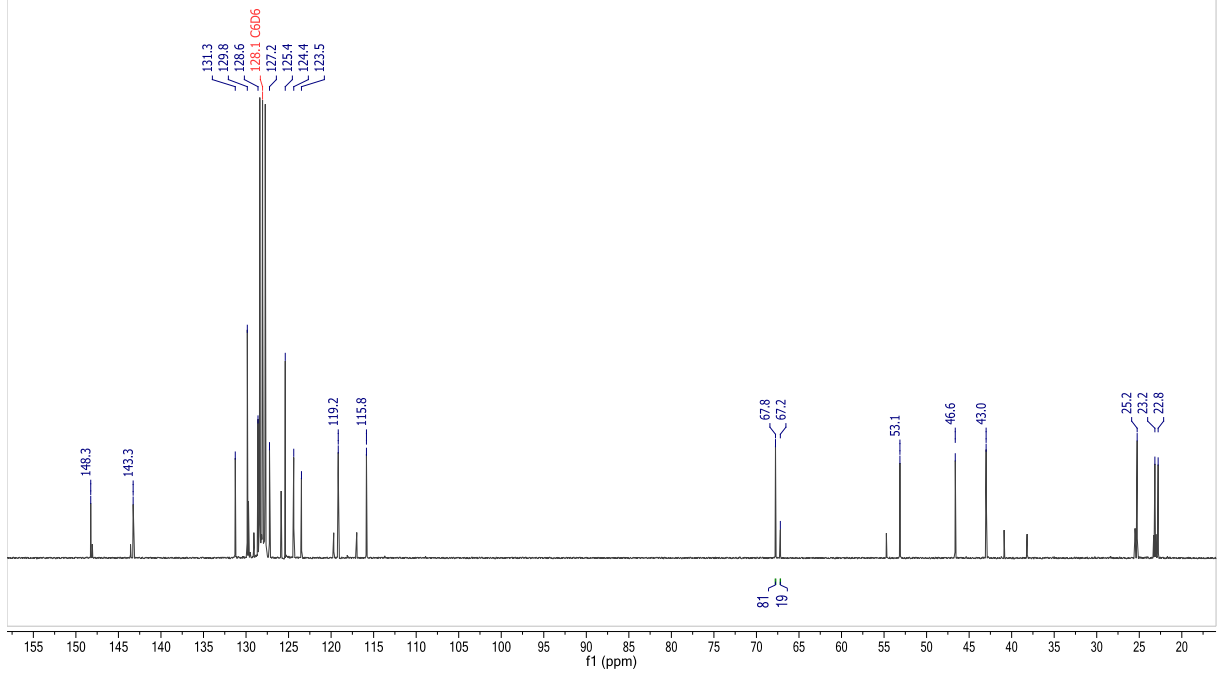

### 4.3.3 Synthesis of (3*S*,4*R*)-1-cyclohexyl-4-propyl)-1,2,3,4-tetrahydroquinoline-3-ol (**2d**).

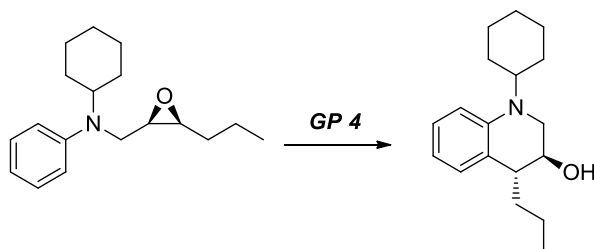

According to GP4: 137 mg of **1d** (1.00 eq., 0.50 mmol), 10 mg zinc (0.30 eq., 0.15 mmol) and 40 mg **cat-(OTs)<sub>2</sub>** (0.10 eq., 0.05 mmol) are reacted in dry THF for 48 hours at room temperature. Regio- and diastereoisomeric ratio were determined by <sup>13</sup>C-NMR of the crude product. Flash chromatography (SiO<sub>2</sub>, Eluent: Ch : Mtbe = 87 : 13) yielded 114 mg **2d** (d.r. = 97 : 3, 83%) as a viscous, colorless liquid.

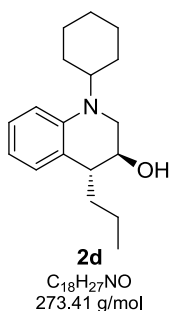

**R<sub>f</sub>** = 0.7 (40% EE in CH); **<sup>1</sup>H-NMR (300 MHz, C<sub>6</sub>D<sub>6</sub>, RT): δ [ppm]** = 0.83 (t, 3H, *J* = 7.0 Hz), 1.10-1.44 (m, 10H), 1.51-1.74 (m, 4H), 1.99-2.17 (*s<sub>br</sub>*, 1H), 2.62-2.69 (m, 1H), 2.89 (dd, 1H, *J* = 12.1 Hz, *J* = 2.5 Hz), 3.00 (ddd, 1H, *J* = 12.2 Hz, *J* = 3.4 Hz, *J* = 1.6 Hz), 3.46 (tt, 1H, *J* = 8.1 Hz, *J* = 3.3 Hz), 3.75-3.82 (m, 1H), 6.67 (d, 1H, *J* = 8.4 Hz), 6.72 (td, 1H, *J* = 7.3 Hz, *J* = 1.0 Hz); 7.01 (dd, 2H, *J* = 7.4 Hz, *J* = 1.7 Hz), 7.10-7.14 (m, 1H). **<sup>13</sup>C-NMR (75 MHz, C<sub>6</sub>D<sub>6</sub>, RT): δ [ppm]** = 14.5, 20.5, 26.3, 26.3, 26.5, 27.3, 29.6, 29.7, 39.2, 44.3, 45.5, 55.7, 66.5, 111.0, 116.4, 123.9, 127.8, 131.7, 144.0. **IR  $\tilde{\nu}$  [cm<sup>-1</sup>]** = 497, 741, 1049, 1174, 1242, 1303, 1455, 1601, 2856, 2929. **HRMS (ESI): *m/z*** calculated for C<sub>18</sub>H<sub>28</sub>NO<sup>+</sup>: 274.2165 u, found: 274.2167 u. **[ $\alpha$ ]<sub>D</sub><sup>20</sup>** = -36.0 ° (c 0.5, CHCl<sub>3</sub>). determination of d.r. (**2c**, isolated) by HPLC: *DAICEL Chiralpak IC-U*; *n*Hexane/*i*PrOH (95 : 5); flowrate 1.0 mL/min; *t<sub>R</sub>* = 1.0 min (minor, *3S4S*), *t<sub>R</sub>* = 1.5 min (minor, *3S4R*); d.r. = 97 : 3.

3813b053.17.10.fid

AK Gansaeuer

Name Muehlhaus

fxm378\_F3

Nacht\_\_1H\_Standard C6D6 E:\ gansaeue 53

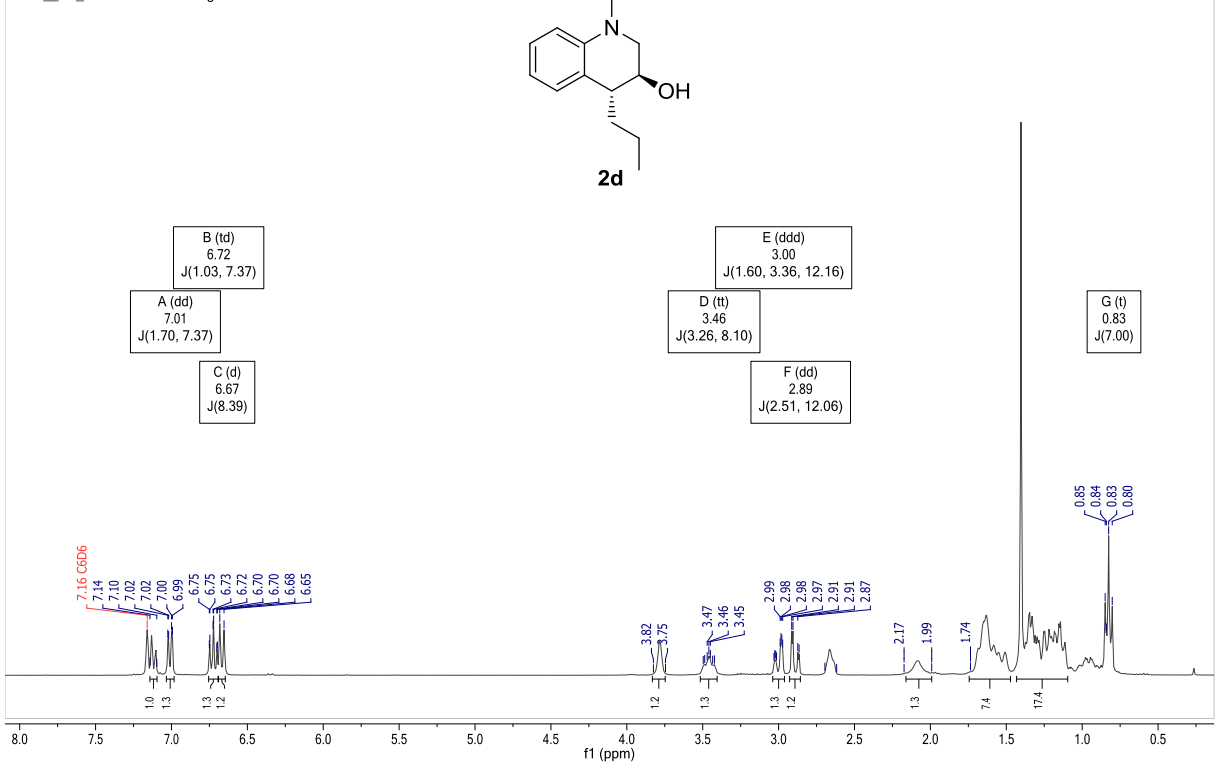

3813b053.17.11.fid

AK Gansaeuer

Name Muehlhaus

fxm378\_F3

Nacht\_13C\_cpd\_3k C6D6 E:\ gansaeue 53

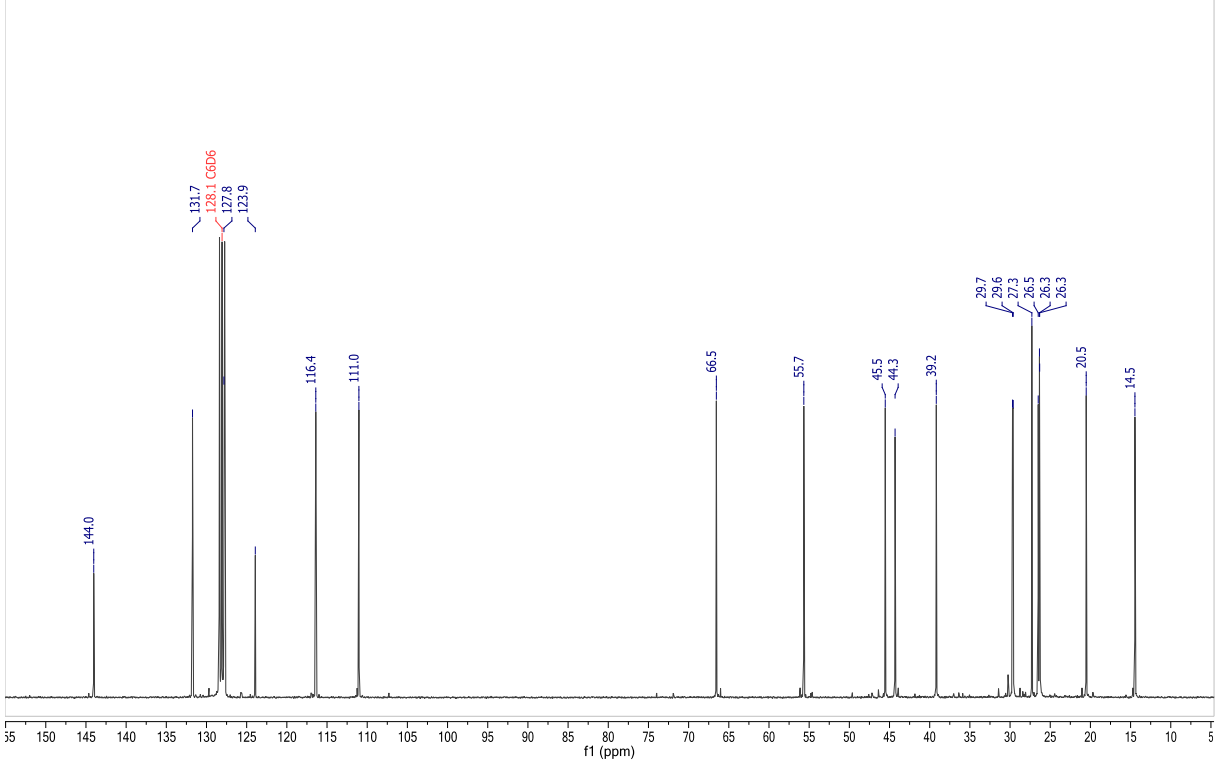

#### 4.3.4 Synthesis of (3*S*,4*R*)-1-isopropyl-4-propyl)-1,2,3,4-tetrahydroquinoline-3-ol (**2e**).

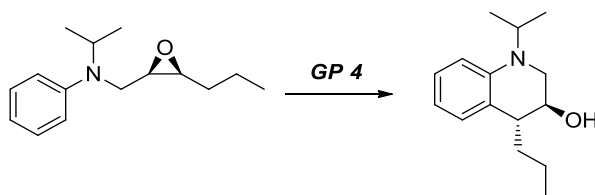

According to GP4: 117 mg of **1e** (1.00 eq., 0.50 mmol), 10 mg zinc (0.30 eq., 0.15 mmol) and 40 mg **cat-(OTs)<sub>2</sub>** (0.10 eq., 0.05 mmol) are reacted in dry THF for 48 hours at room temperature. Regio- and diastereoisomeric ratio were determined by <sup>13</sup>C-NMR of the crude product. Flash chromatography (SiO<sub>2</sub>, Eluent: Ch : Mtbe = 87 : 13) yielded 82 mg **2e** (d.r. = 95 : 5, 70%) as a viscous, colorless liquid.

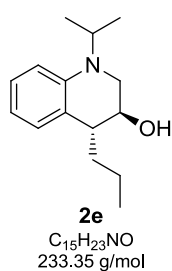

**R<sub>f</sub>** = 0.6 (40% EE in CH), **<sup>1</sup>H-NMR (300 MHz, C<sub>6</sub>D<sub>6</sub>, RT): δ [ppm]** = 0.80 (t, 3H, *J* = 7.0 Hz), 0.87 (d, 3H, *J* = 6.6 Hz), 0.91 (d, 3H, *J* = 6.6 Hz), 1.12-1.40 (m, 4H), 1.51-1.74 (m, 4H), 1.66-1.74 (*s<sub>br</sub>*, 1H), 2.60-2.68 (m, 1H), 2.78 (dd, 1H, *J* = 12.0 Hz, *J* = 2.4 Hz), 2.91 (ddd, 1H, *J* = 12.1 Hz, *J* = 3.4 Hz, *J* = 1.7 Hz), 3.73-3.88 (m, 2H), 6.60 (dt, 1H, *J* = 8.4 Hz, *J* = 0.9 Hz), 6.75 (td, 1H, *J* = 7.3 Hz, *J* = 1.1 Hz), 7.01 (dd, 2H, *J* = 7.4 Hz, *J* = 1.8 Hz), 7.10-7.18 (m, 1H). **<sup>13</sup>C-NMR (75 MHz, C<sub>6</sub>D<sub>6</sub>, RT): δ [ppm]** = 14.4, 18.4, 19.1, 20.5, 39.3, 42.7, 45.6, 46.2, 66.4, 111.2, 116.6, 124.0, 127.9, 131.8, 144.1. **IR (Film)  $\tilde{\nu}$  [cm<sup>-1</sup>]** = 453, 741, 1051, 1088, 1119, 1168, 1190, 1302, 1363, 1456, 1495, 1601, 2871, 2928, 2957. **HRMS (ESI): *m/z*** calculated for C<sub>15</sub>H<sub>26</sub>NO<sup>+</sup>: 236.2009 u, found: 234.1855 u. **[ $\alpha$ ]<sub>D</sub><sup>20</sup>** = -50.0 ° (c 0.1, CHCl<sub>3</sub>). d.r. = 95 : 5 (**2d**, isolated).

0713b002.18.10.fid  
 AK Gansaeuer  
 Name Muehlhaus  
 fxm438\_c2\_F2  
 Nacht\_\_1H\_Standard C6D6 E:\ gansaeue 2

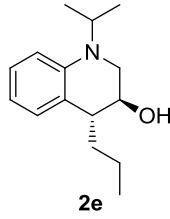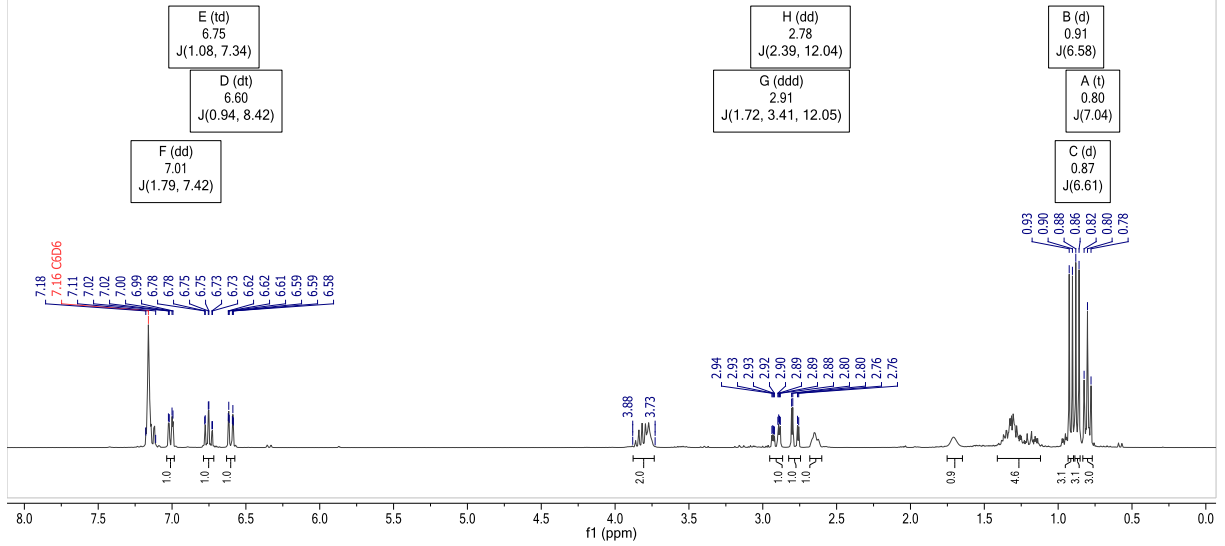

0713b002.18.11.fid  
 AK Gansaeuer  
 Name Muehlhaus  
 fxm438\_c2\_F2  
 Nacht\_13C\_cpd\_3k C6D6 E:\ gansaeue 2

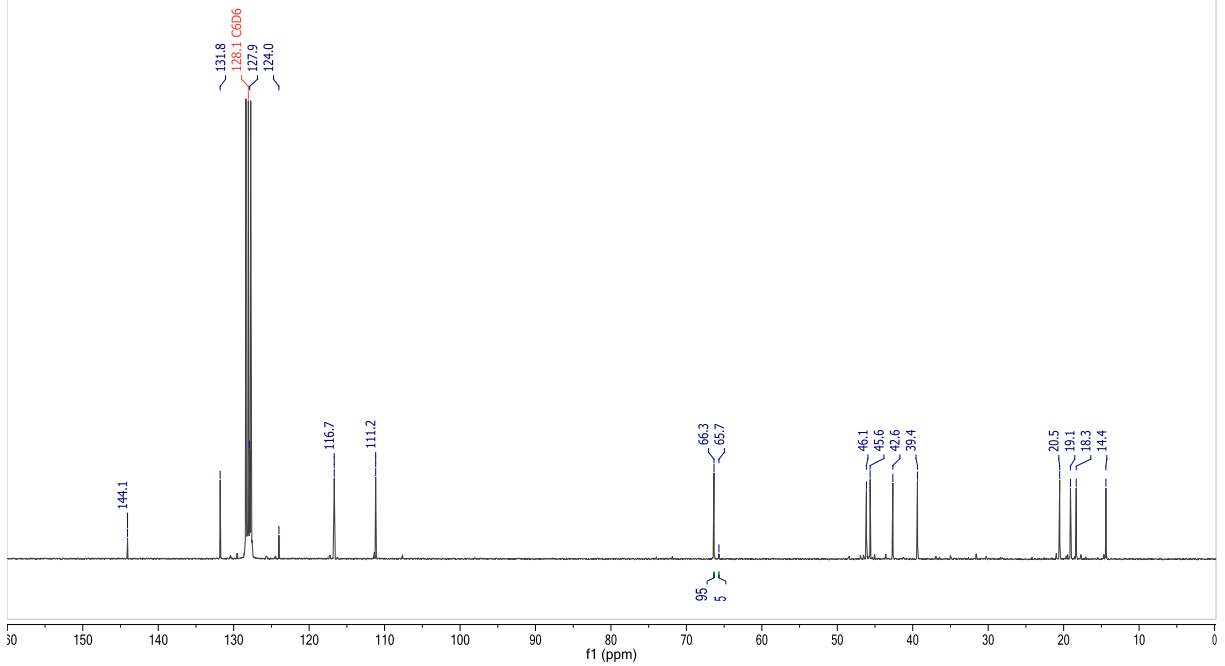

#### 4.3.5 Synthesis of (3*S*,4*R*)-1-cyclopropyl-4-propyl-1,2,3,4-tetrahydroquinolin-3-ol (**2f**).

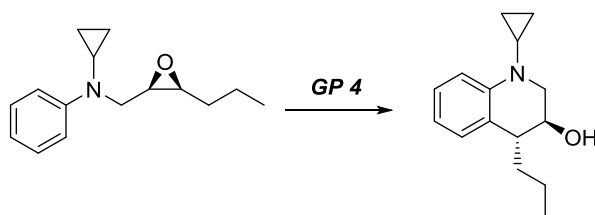

According to GP4: 116 mg of **1f** (1.00 eq., 0.50 mmol), 10 mg zinc (0.30 eq., 0.15 mmol) and 40 mg **cat-(OTs)<sub>2</sub>** (0.10 eq., 0.05 mmol) are reacted in dry THF for 48 hours at room temperature. Regio- and diastereoisomeric ratio were determined by <sup>13</sup>C-NMR of the crude product. Flash chromatography (SiO<sub>2</sub>, Eluent: Ch : Mtbe = 90 : 10) yielded 94 mg **2f** (d.r. = 98 : 2, 81%) as a viscous, colorless liquid.

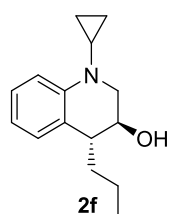

**2f**  
C<sub>15</sub>H<sub>21</sub>NO  
233.35 g/mol

$R_f = 0.6$  (30 % EE in CH); <sup>1</sup>H NMR (300.1 MHz, C<sub>6</sub>D<sub>6</sub>, RT)  $\delta$  [ppm] = 0.27-0.53 (m, 4H), 0.80 (t,  $J = 7.0$  Hz, 3H), 1.11-1.45 (m, 4H), 1.66-1.88 (m, 1H), 2.03 (tt,  $J = 5.3$  Hz,  $J = 4.5$  Hz, 1H), 2.65 (td,  $J = 6.6$  Hz,  $J = 5.6$  Hz,  $J = 2.7$  Hz, 1H), 2.98-3.03 (m, 2H), 3.75 (q,  $J = 2.9$  Hz, 1H), 6.84 (ddd,  $J = 7.7$  Hz,  $J = 4.9$  Hz,  $J = 3.6$  Hz, 1H), 7.03 (dq,  $J = 7.6$  Hz,  $J = 0.8$  Hz, 1H), 7.18-7.22 (m, 2H); <sup>13</sup>C NMR (75.5 MHz, CDCl<sub>3</sub>, RT)  $\delta$  [ppm] = 8.0, 9.5, 14.4, 20.6, 31.9, 39.7, 45.2, 51.4, 66.9, 113.3, 118.4, 125.1, 127.3, 130.9, 145.5; IR  $\nu_{\max}$  (neat) [cm<sup>-1</sup>] = 491, 527, 745, 778, 939, 1023, 1046, 1181, 1234, 1301, 1362, 1450, 1495, 1601, 2928, 2954; HRMS (ESI):  $m/z$  calculated for [M+H]<sup>+</sup> 232.1696 u found: 232.1702 u..  $[\alpha]_D^{20} = +12.4$  °(c 1, CHCl<sub>3</sub>)

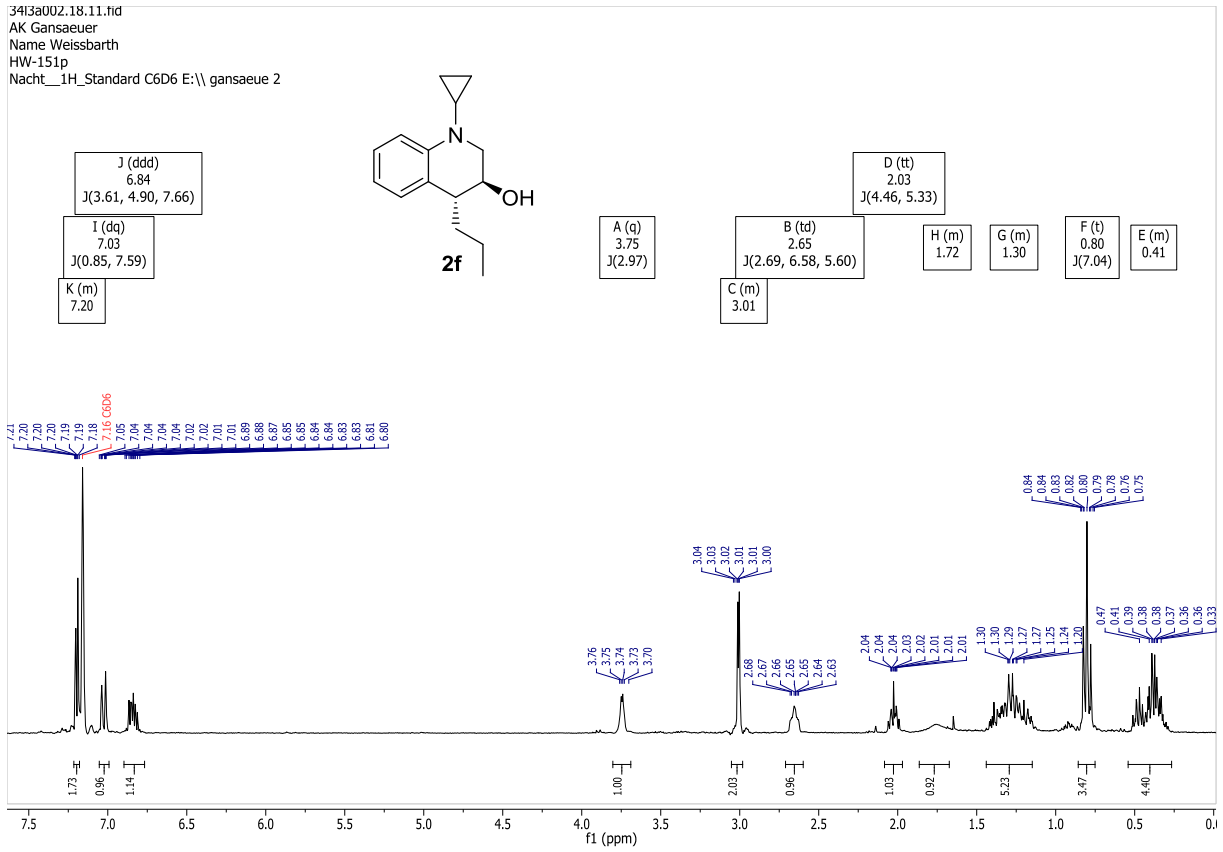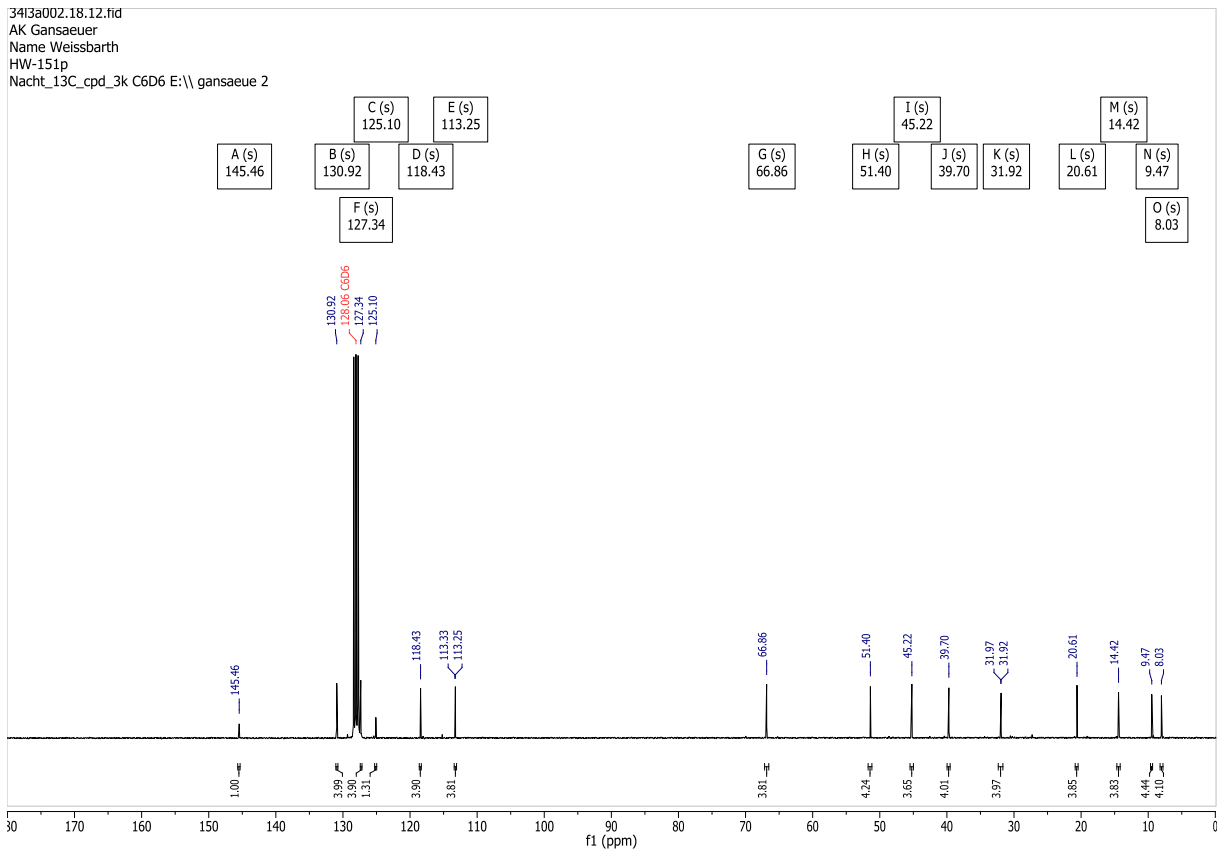



#### 4.3.6 Synthesis of (3*S*,4*R*)-1-methyl-4-propyl-1,2,3,4-tetrahydroquinoline-3-ol (**2g**).

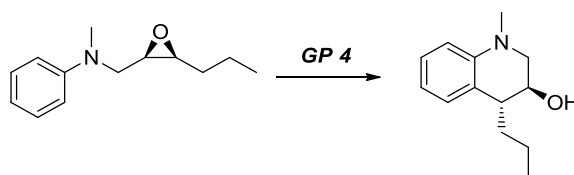

According to GP4: 103 mg of **1g** (1.00 eq., 0.50 mmol), 10 mg zinc (0.30 eq., 0.15 mmol) and 40 mg **cat-(OTs)<sub>2</sub>** (0.10 eq., 0.05 mmol) are reacted in dry THF for 48 hours at room temperature. Regio- and diastereoisomeric ratio were determined by <sup>13</sup>C-NMR of the crude product. Flash chromatography (SiO<sub>2</sub>, Eluent: Ch : Mtbe = 87 : 13) was performed rapidly and yielded 91 mg **2g** (d.r. = 96 : 4, 89%) as a transparent-yellow solid (m.p. = 36 °C).

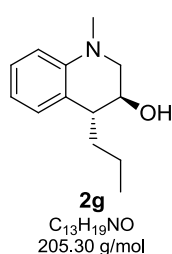

$R_f = 0.6$  (40% EE in CH), <sup>1</sup>H-NMR (500 MHz, C<sub>6</sub>D<sub>6</sub>, RT):  $\delta$  [ppm] = 0.79 (t, 3H,  $J = 7.1$  Hz), 1.11-1.35 (m, 4H), 1.96-2.08 (s<sub>broad</sub>, 1H), 2.48 (s, 3H), 2.62-2.67 (m, 1H), 2.78 (ddd, 1H,  $J = 11.9$  Hz,  $J = 3.4$  Hz,  $J = 1.7$  Hz), 2.98 (dd, 1H,  $J = 11.9$  Hz,  $J = 2.4$  Hz), 3.72 (dd, 1H,  $J = 2.9$  Hz,  $J = 2.9$  Hz), 6.50 (d, 1H,  $J = 8.3$  Hz), 6.75 (dd, 1H,  $J = 7.4$  Hz,  $J = 1.2$  Hz), 6.98 (dd, 1H,  $J = 7.4$  Hz,  $J = 1.6$  Hz), 7.13 (ddd, 1H,  $J = 8.5$  Hz,  $J = 7.3$  Hz,  $J = 1.7$  Hz). <sup>13</sup>C-NMR (125 MHz, C<sub>6</sub>D<sub>6</sub>, RT):  $\delta$  [ppm] = 14.4, 20.5, 38.5, 39.5, 45.3, 53.5, 66.9, 111.2, 117.2, 123.9, 127.8, 131.1, 145.1. IR  $\tilde{\nu}$  [cm<sup>-1</sup>] = 452, 499, 744, 1056, 1116, 1211, 1294, 1336, 1454, 1505, 1603, 2871, 2930, 2956. HRMS (ESI):  $m/z$  calculated for C<sub>13</sub>H<sub>20</sub>NO<sup>+</sup>: 206.1539 u, found: 206.1536 u.  $[\alpha]_D^{20} = -28.0$  (c 0.2, CHCl<sub>3</sub>); determination of d.r. by HPLC: DAICEL Chiralpak 1A; *n*-Hexane/*i*PrOH (95:5); flowrate 1.0 mL/min;  $t_R = 8.7$  min (minor, 3*S*4*R*),  $t_R = 9.6$  min (major, 3*R*4*S*); d.r. = 4 : 96 (*cis* : *trans*, **2g** isolated).

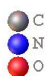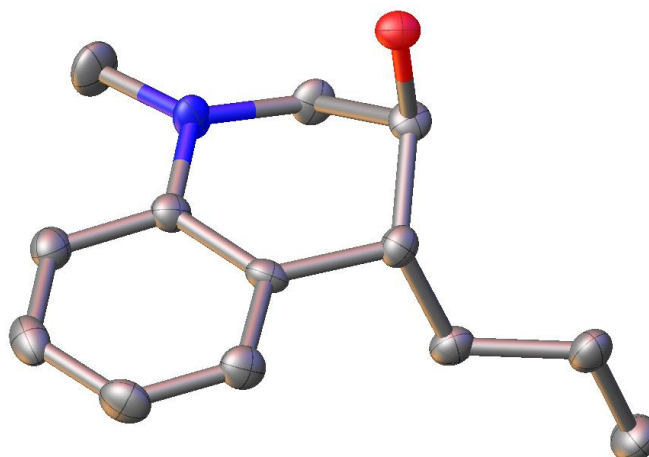

## S70

03c5a041.18.10.fid  
Instrument Bruker Avance I 500 MHz  
AK Prof. Gansaeuer  
Name Muehlhaus  
THQ-III  
001\_H\_Standard C6D6 E:\\ gansaeue 41

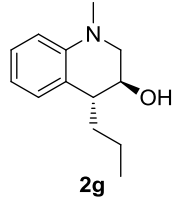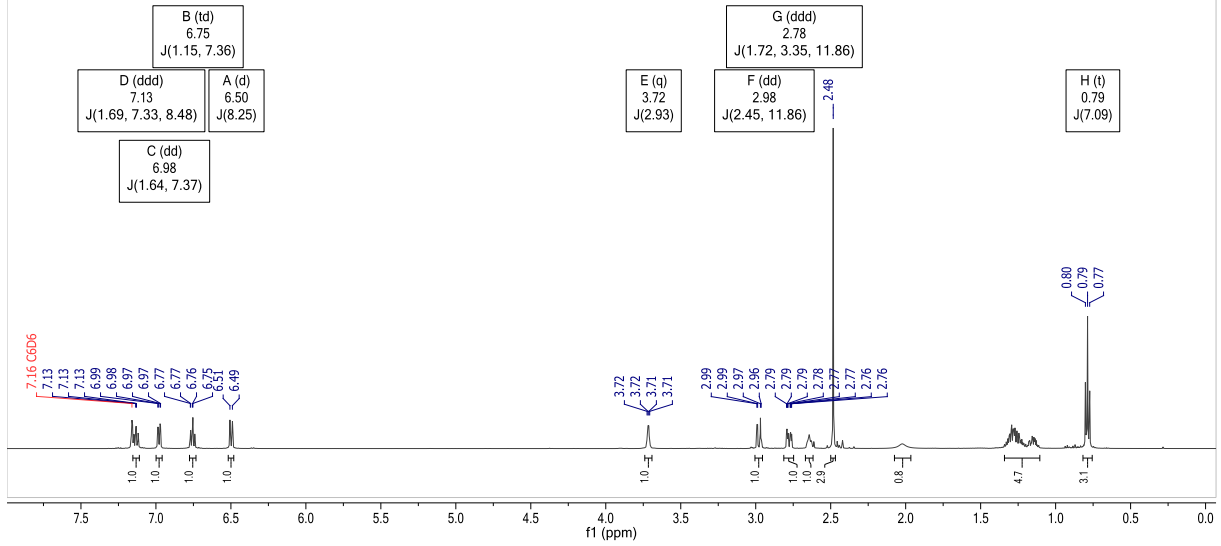

03c5a041.18.11.fid  
Instrument Bruker Avance I 500 MHz  
AK Prof. Gansaeuer  
Name Muehlhaus  
THQ-III  
013\_C\_cpd\_N C6D6 E:\\ gansaeue 41

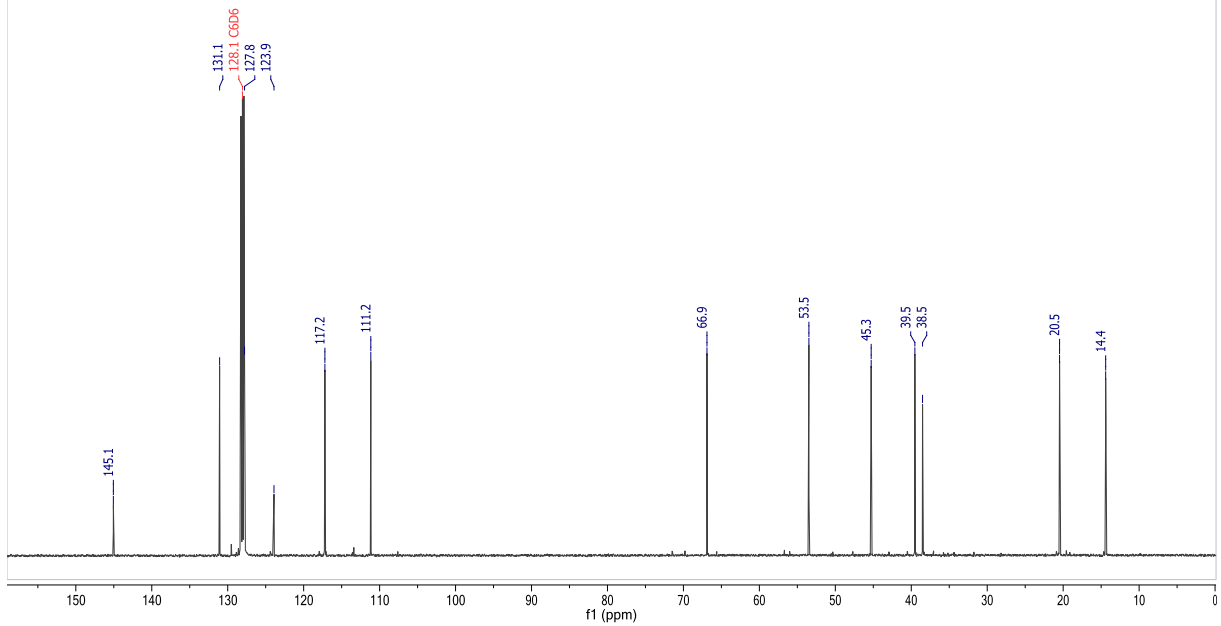

#### 4.3.7 Synthesis of (3*S*,4*R*)-6-chloro-1-cyclohexyl-4-propyl-1,2,3,4-tetrahydroquinolin-3-ol (2h).

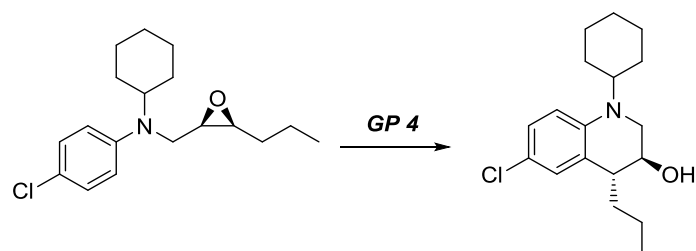

According to GP4: 154 mg of **1h** (1.00 eq., 0.50 mmol), 10 mg zinc (0.30 eq., 0.15 mmol) and 40 mg **cat-(OTs)<sub>2</sub>** (0.10 eq., 0.05 mmol) are reacted in dry THF for 48 hours at room temperature. Regio- and diastereoisomeric ratio were determined by <sup>13</sup>C-NMR of the crude product. Flash chromatography (SiO<sub>2</sub>, Eluent: Ch : Mtbe = 90 : 10) yielded 119 mg **2h** (d.r. = >98 : <2, 77%) as a viscous, colorless liquid.

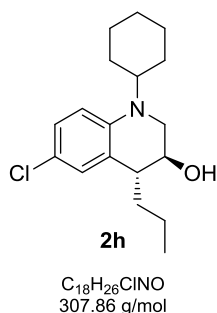

$R_f = 0.4$  (20 % EE in CH); <sup>1</sup>H NMR (500.1 MHz, C<sub>6</sub>D<sub>6</sub>, RT)  $\delta$  [ppm] = 0.75 (t,  $J = 6.9$  Hz, 3H), 0.86-0.98 (m, 1H), 1.02-1.27 (m, 8H), 1.45-1.66 (m, 6H), 2.47 (ddt,  $J = 8.6$  Hz,  $J = 5.7$  Hz,  $J = 2.3$  Hz, 1H), 2.90 (ddd,  $J = 12.2$  Hz,  $J = 3.2$  Hz,  $J = 1.7$  Hz, 1H), 3.28 (tq,  $J = 11.2$  Hz,  $J = 3.8$  Hz, 1H), 3.69 (q,  $J = 2.7$  Hz, 1H), 6.42 (d,  $J = 8.9$  Hz, 1H), 7.05 (d,  $J = 2.6$  Hz, 1H), 7.12 (dt,  $J = 9.0$  Hz,  $J = 1.8$  Hz, 1H); <sup>13</sup>C NMR (125 MHz, CDCl<sub>3</sub>, RT)  $\delta$  [ppm] = 14.1, 20.4, 26.2, 26.3, 29.4, 29.5, 38.9, 44.1, 45.4, 55.8, 66.1, 112.2, 120.9, 125.8, 127.6, 131.2, 142.6; IR  $\nu_{max}$  (neat) [cm<sup>-1</sup>] = 405, 445, 546, 605, 654, 750, 791, 835, 871, 891, 956, 1062, 1107, 1171, 1241, 1263, 1299, 1343, 1378, 1421, 1451, 1494, 1596, 1659, 2854, 2928, 3348; HRMS (ESI):  $m/z$  calculated for [M+H]<sup>+</sup> 308.1776 u found: 308.1772 u. [ $\alpha$ ]<sub>D</sub><sup>20</sup> = -22.3 °(c 1, CHCl<sub>3</sub>)

05c5a011.19.10.fid  
 Instrument Bruker Avance I 500 MHz  
 AK Prof. Gansaeuer  
 Name Weissbarth  
 Title HW-180p  
 001\_H\_N C6D6 E:\ gansaeue 11

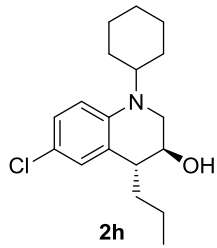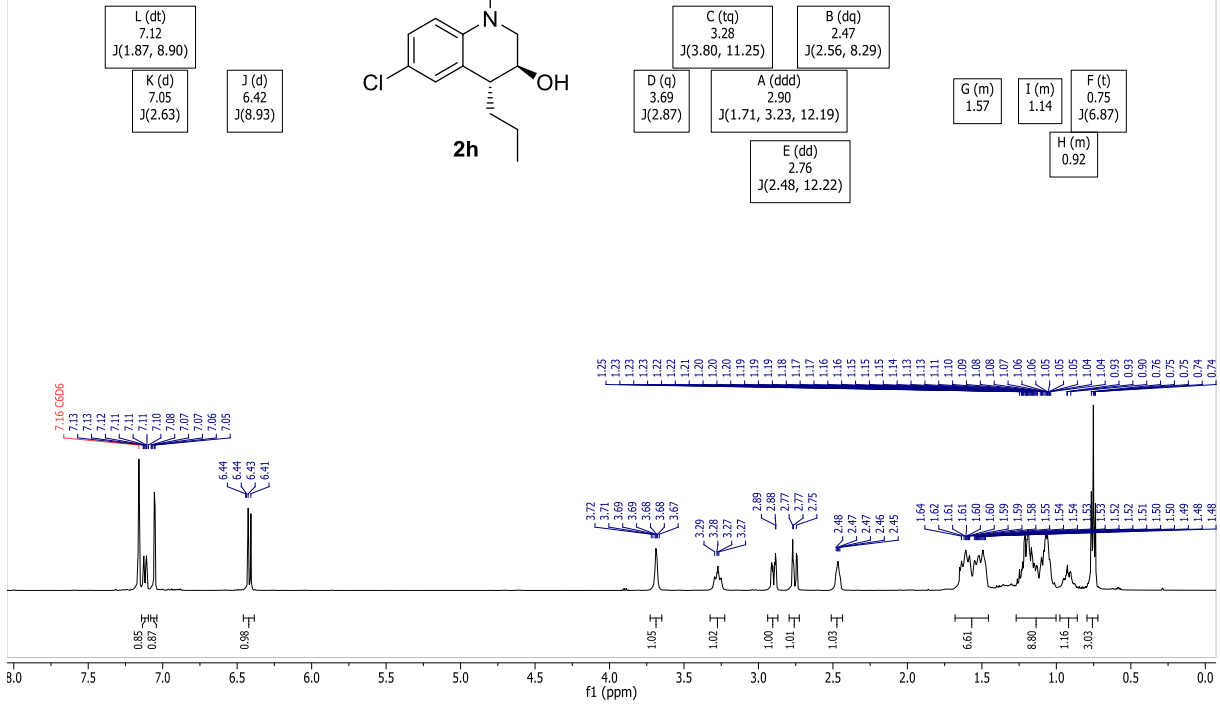

05c5a011.19.11.fid  
 Instrument Bruker Avance I 500 MHz  
 AK Prof. Gansaeuer  
 Name Weissbarth  
 Title HW-180p  
 013\_C\_cpd C6D6 E:\ gansaeue 11

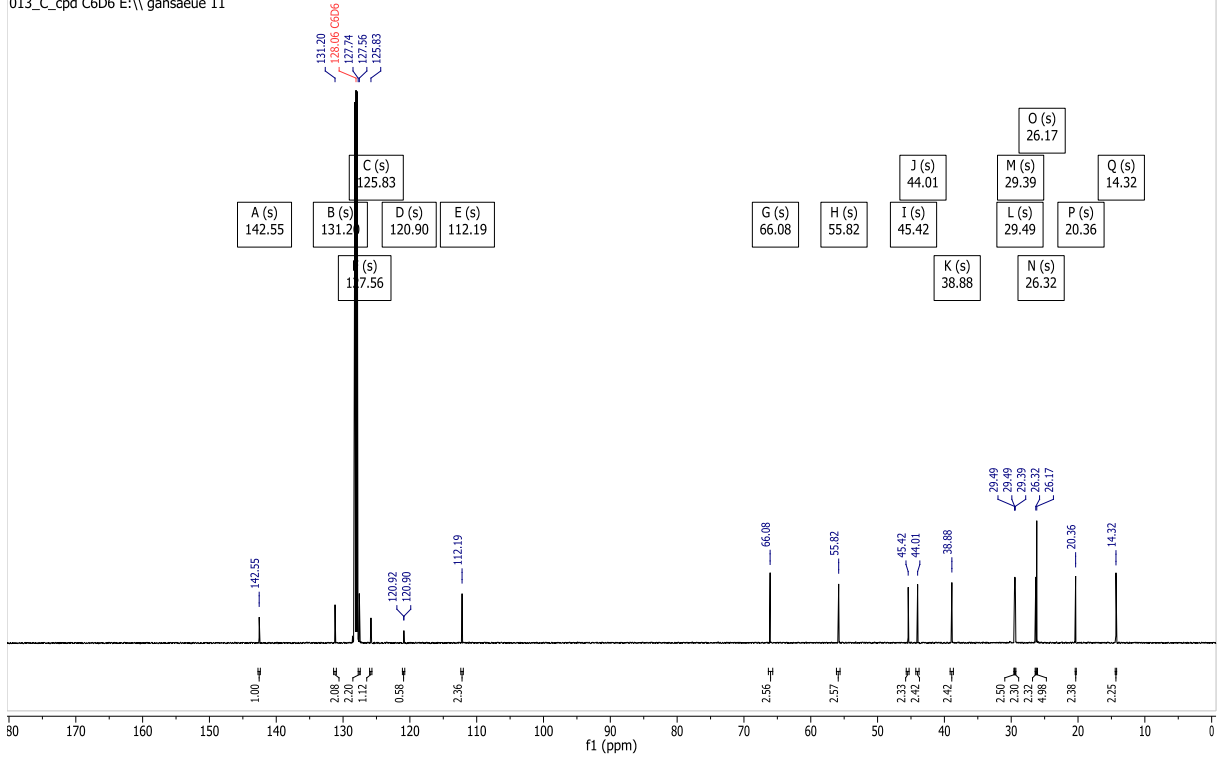

### 4.3.8 Synthesis of (3*S*,4*R*)-6-chloro-1-isopropyl-4-propyl-1,2,3,4-tetrahydroquinolin-3-ol (2j).

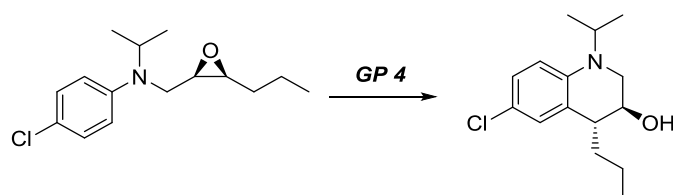

According to GP4: 134 mg of **1j** (1.00 eq., 0.50 mmol), 10 mg zinc (0.30 eq., 0.15 mmol) and 40 mg **cat-(OTs)<sub>2</sub>** (0.10 eq., 0.05 mmol) are reacted in dry THF for 48 hours at room temperature. Regio- and diastereoisomeric ratio were determined by <sup>13</sup>C-NMR of the crude product. Flash chromatography (SiO<sub>2</sub>, Eluent: Ch : Mtbe = 90 : 10) yielded 112 mg **2j** (d.r. = >98 : <2, 84%) as a viscous, colorless liquid.

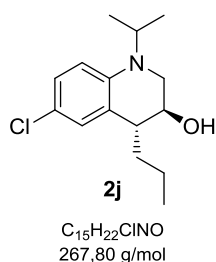

**R<sub>f</sub>** = 0.3 (30 % MTBE in CH); <sup>1</sup>H NMR (300.1 MHz, C<sub>6</sub>D<sub>6</sub>, RT) δ [ppm] = 0.70-0.76 (m, 3H), 0.79 (d, *J* = 6.6 Hz, 3H), 0.85 (d, *J* = 6.5 Hz, 3H), 0.91-1.28 (m, 4H), 1.72 (s<sub>br</sub>, 1H), 2.44 (tt, *J* = 6.6 Hz, *J* = 2.2 Hz, 1H), 2.66 (dd, *J* = 12.2 Hz, *J* = 2.5 Hz, 1H), 2.81 (ddd, *J* = 12.2 Hz, *J* = 3.3 Hz, *J* = 1.7 Hz, 1H), 3.60 (h, *J* = 6.6 Hz, 1H), 3.67 (q, *J* = 2.9 Hz, 1H), 6.29 (dd, *J* = 8.8 Hz, *J* = 0.8 Hz, 1H), 7.03 (dd, *J* = 2.6 Hz, *J* = 0.7 Hz, 1H), 7.10 (dd, *J* = 8.9 Hz, *J* = 2.6 Hz, 1H); <sup>13</sup>C NMR (75 MHz, CDCl<sub>3</sub>, RT) δ [ppm] = 14.3, 18.3, 18.9, 20.4, 38.9, 42.4, 45.5, 46.4, 65.9, 112.3, 121.0, 125.9, 127.6, 131.1, 142.6; IR ν<sub>max</sub> (neat) [cm<sup>-1</sup>] = 538, 629, 785, 796, 874, 1051, 1195, 1264, 1306, 1494; HRMS (ESI): *m/z* calculated for [M+H]<sup>+</sup> 268.1463 u found: 268.1460 u. [α]<sub>D</sub><sup>20</sup> = -47.8 °(c 1, CHCl<sub>3</sub>)

4513b011.18.10.1.1r  
 AK Gansaeuer  
 Name Weissbarth  
 HW-163-S2-F2  
 Tag\_\_1H\_Standard C6D6 E:\\ gansaeue 11

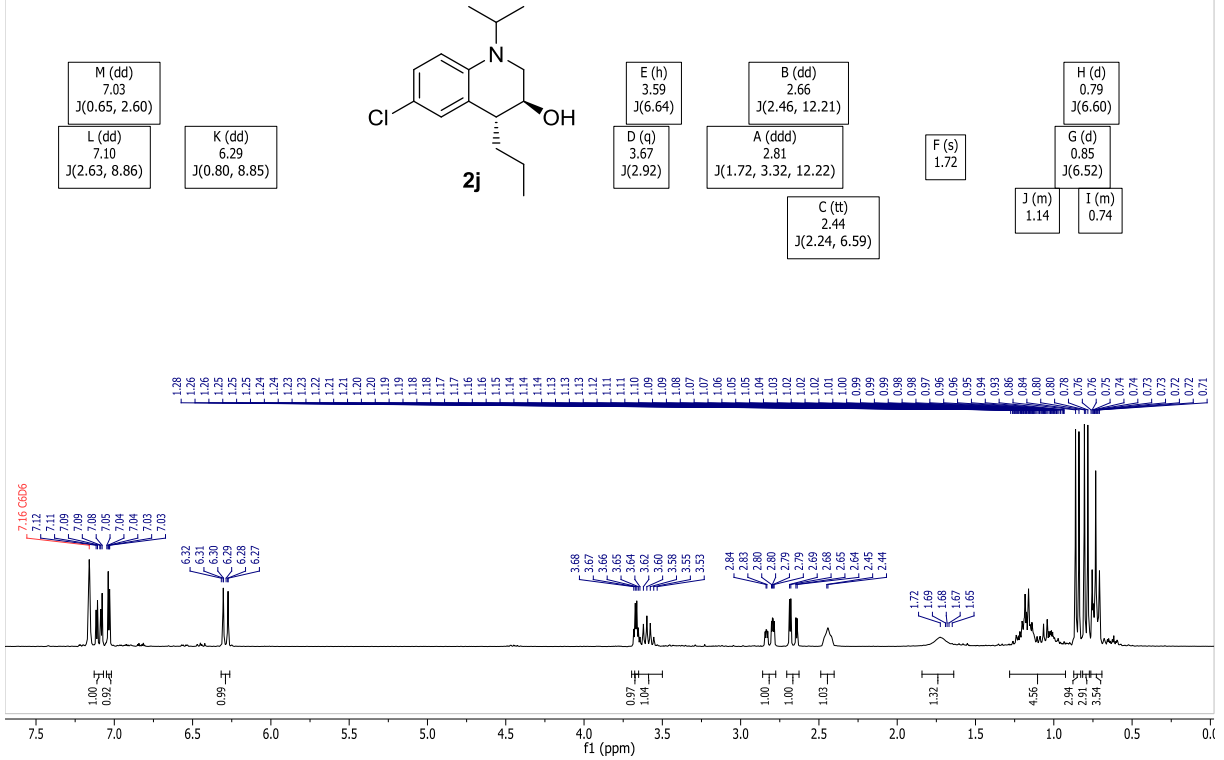

4513b011.18.11.1.1r  
 AK Gansaeuer  
 Name Weissbarth  
 HW-163-S2-F2  
 Nacht\_13C\_cpd\_1k C6D6 E:\\ gansaeue 11

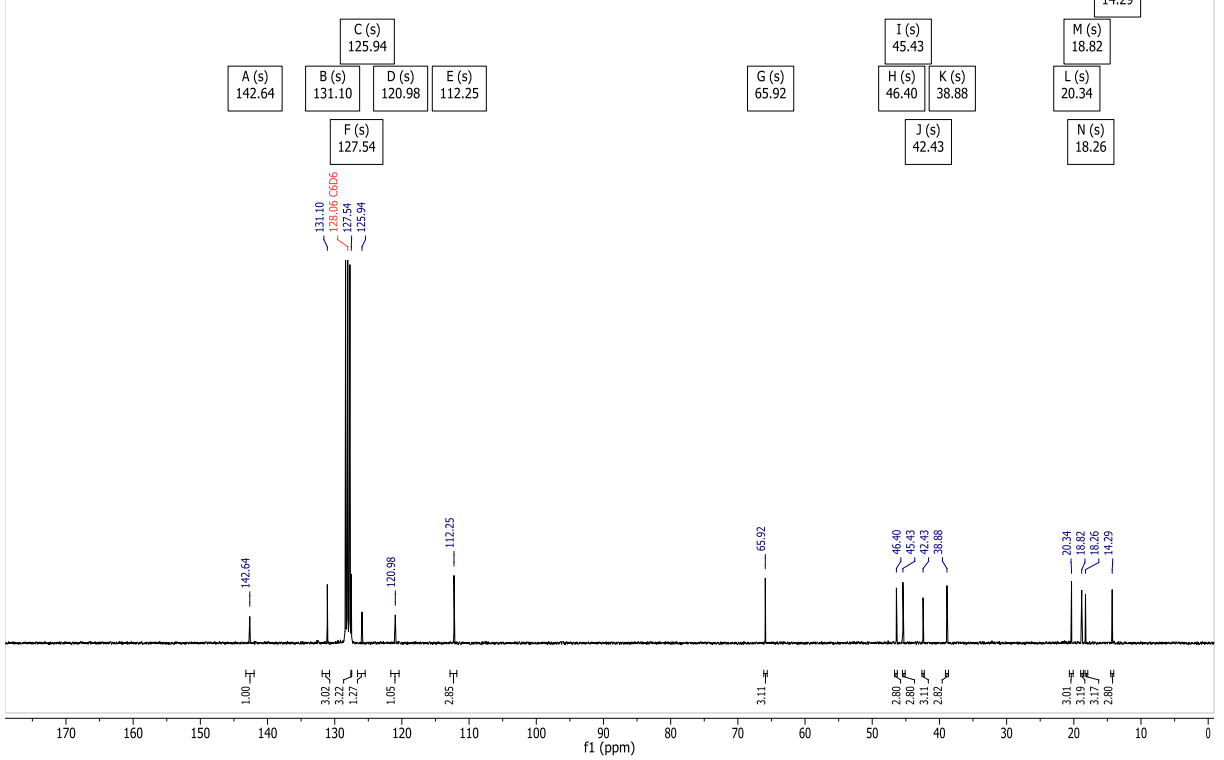

### 4.3.9 (3*S*,4*R*)-1-cyclopropyl-6-fluoro-4-propyl-1,2,3,4-tetrahydroquinolin-3-ol (**21**).

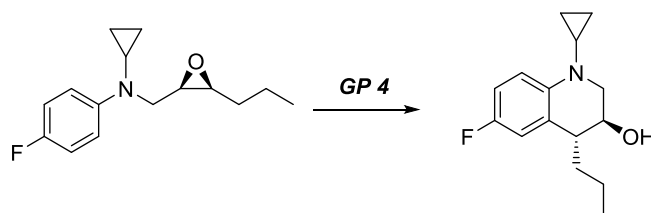

According to GP4: 125 mg of **11** (1.00 eq., 0.50 mmol), 10 mg zinc (0.30 eq., 0.15 mmol) and 40 mg **cat-(OTs)<sub>2</sub>** (0.10 eq., 0.05 mmol) are reacted in dry THF for 48 hours at room temperature. Regio- and diastereoisomeric ratio were determined by <sup>13</sup>C-NMR of the crude product. Flash chromatography (SiO<sub>2</sub>, Eluent: CH : MTBE = 90 : 10) yielded 98 mg **21** (d.r. = 97 : 3, 79%) as a viscous, colorless liquid.

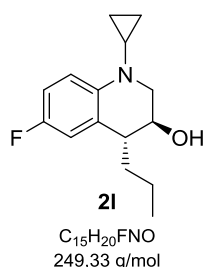

**R<sub>f</sub>** = 0.3 (20 % EE in CH); <sup>1</sup>H NMR (500.1 MHz, C<sub>6</sub>D<sub>6</sub>, RT) δ [ppm] = 0.26-0.49 (m, 4H), 0.76 (t, *J* = 7.2 Hz, 3H), 1.07-1.34 (m, 4H), 1.92 (tt, *J* = 6.4 Hz, *J* = 3.8 Hz, 2H), 2.48-2.55 (m, 1H), 2.89 (dd, *J* = 11.8 Hz, *J* = 2.4 Hz, 1H), 2.93 (ddd, *J* = 11.8 Hz, *J* = 3.9 Hz, *J* = 1.4 Hz, 1H), 3.67 (q, *J* = 3.0 Hz, 1H), 6.80 (ddd, *J* = 9.2 Hz, *J* = 3.0 Hz, *J* = 0.8 Hz, 1H), 6.87 (td, *J* = 8.7 Hz, *J* = 3.0 Hz, 1H), 6.97 (dd, *J* = 9.0 Hz, *J* = 5.0 Hz, 1H); <sup>13</sup>C NMR (125 MHz, CDCl<sub>3</sub>, RT) δ [ppm] = 7.9, 9.5, 14.4, 20.5, 32.2, 39.4, 45.3 (d, *J*<sub>C,F</sub> = 1.2 Hz), 51.5, 66.7, 113.5 (d, *J*<sub>C,F</sub> = 21.6 Hz), 113.9 (d, *J*<sub>C,F</sub> = 7.3 Hz), 117.0 (d, *J*<sub>C,F</sub> = 21.7 Hz), 127.2 (d, *J*<sub>C,F</sub> = 6.3 Hz), 141.9 (d, *J*<sub>C,F</sub> = 1.8 Hz), 156.8 (d, *J*<sub>C,F</sub> = 235.7 Hz); <sup>19</sup>F NMR (470 MHz, C<sub>6</sub>D<sub>6</sub>, RT) δ [ppm] = -127.3; IR ν<sub>max</sub> (neat) [cm<sup>-1</sup>] = 705, 803, 865, 1025, 1055, 1208, 1363, 1498; HRMS (ESI): *m/z* calculated for [M+H]<sup>+</sup> 250.1602 u found: 250.1610 u. [α]<sub>D</sub><sup>20</sup> = +15.7 °(c 1, CHCl<sub>3</sub>)

40c5a005.18.10.fid  
 Instrument Bruker Avance I 500 MHz  
 AK Prof. Gansaeuer  
 Name Weissbarth  
 Title HW-155-S2-F1  
 001\_H\_N C6D6 E:\ gansaeue 5

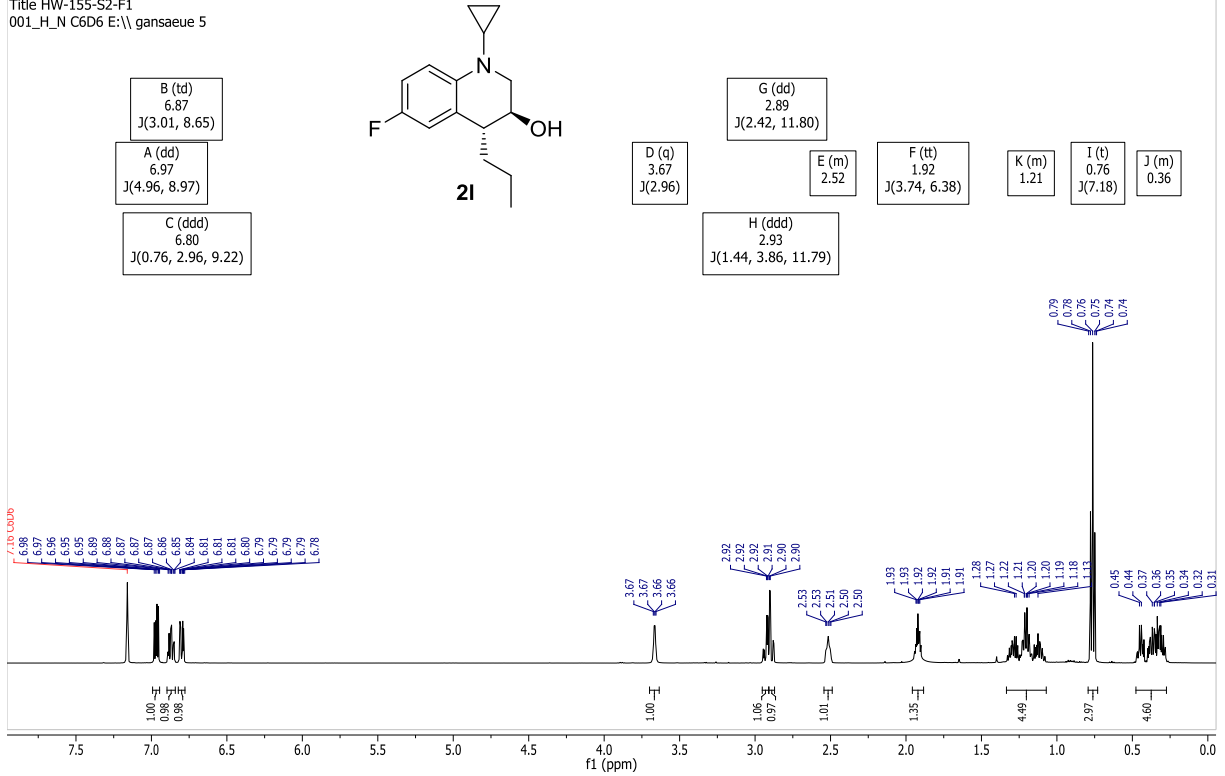

40c5a005.18.11.fid  
 Instrument Bruker Avance I 500 MHz  
 AK Prof. Gansaeuer  
 Name Weissbarth  
 Title HW-155-S2-F1  
 013\_C\_cpD C6D6 E:\ gansaeue 5

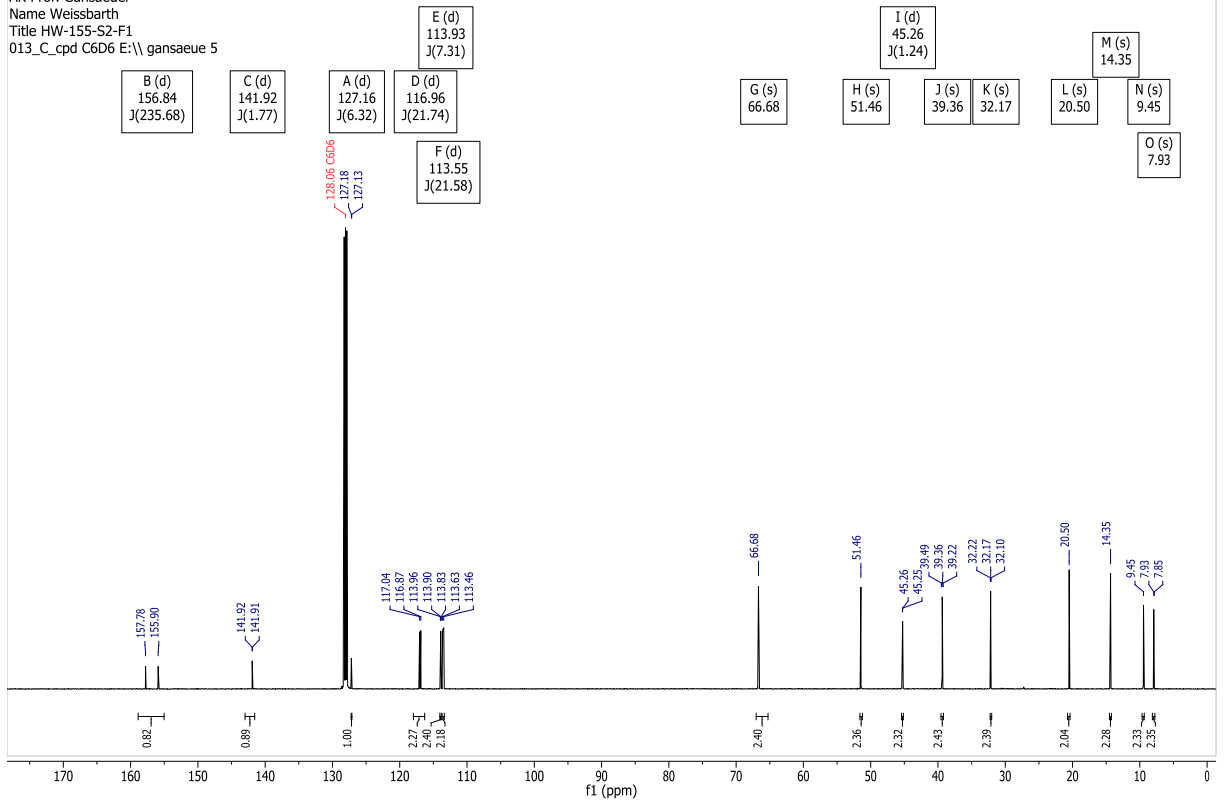



16c5a003.19.11.fid  
Instrument Bruker Avance I 500 MHz  
AK Prof. Gansaeuer  
Name Weissbarth  
Title HW-155-F  
019\_F\_cpd\_H C6D6 E:\\ gansaeue 3

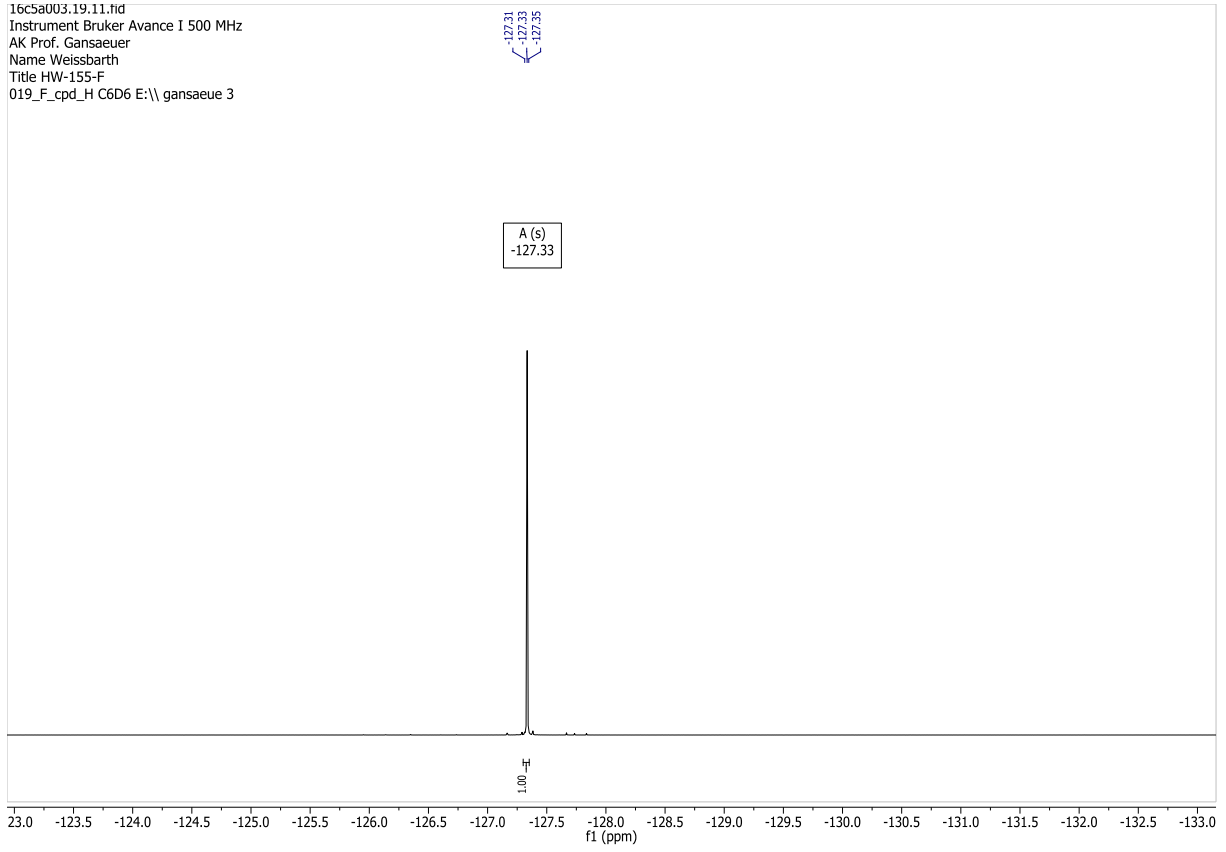

#### 4.3.10 Synthesis of (3*S*,4*R*)-6-chloro-1-methyl-4-propyl-1,2,3,4-tetrahydroquinoline-3-ol (**2m**).

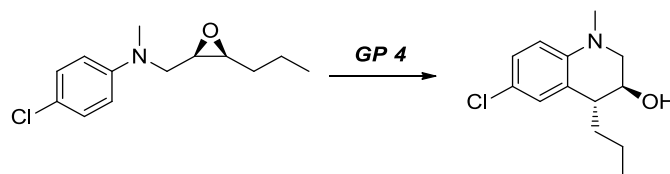

According to GP4: 120 mg of **1m** (1.00 eq., 0.50 mmol), 10 mg zinc (0.30 eq., 0.15 mmol) and 40 mg **cat-(OTs)<sub>2</sub>** (0.10 eq., 0.05 mmol) are reacted in dry THF for 48 hours at room temperature. Regio- and diastereoisomeric ratio were determined by <sup>13</sup>C-NMR of the crude product. Flash chromatography (SiO<sub>2</sub>, Eluent: Ch : Mtbe = 87 : 13) was performed rapidly and yielded 97 mg **2m** (d.r. = 98 : 2, 81%) as a viscous, yellow liquid.

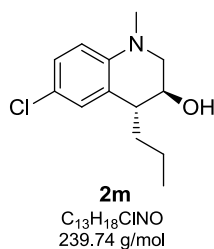

$R_f = 0.5$  (40% EE in CH), <sup>1</sup>H-NMR (300 MHz, C<sub>6</sub>D<sub>6</sub>, RT):  $\delta$  [ppm] = 0.73 (t, 3H,  $J = 7.0$  Hz), 0.97-1.22 (m, 4H), 2.35 (s, 3H), 2.44 (dtd, 1H,  $J = 8.7$  Hz,  $J = 5.9$  Hz,  $J = 3.2$  Hz), 2.67 (ddd, 1H,  $J = 12.6$  Hz,  $J = 3.3$  Hz,  $J = 1.7$  Hz), 2.86 (dd, 1H,  $J = 12.6$  Hz,  $J = 2.4$  Hz), 3.60 (q, 1H,  $J = 2.9$  Hz), 6.19 (d, 1H,  $J = 8.7$  Hz), 7.00 (dd, 1H,  $J = 2.6$  Hz,  $J = 0.7$  Hz), 7.08 (dd, 1H,  $J = 8.7$  Hz,  $J = 2.6$  Hz). <sup>13</sup>C-NMR (75 MHz, C<sub>6</sub>D<sub>6</sub>, RT):  $\delta$  [ppm] = 14.3, 20.3, 38.4, 39.1, 45.2, 53.1, 66.5, 112.2, 121.7, 125.7, 127.5, 130.6, 143.5. IR  $\tilde{\nu}$  [cm<sup>-1</sup>] = 507, 629, 764, 808, 957, 1097, 1120, 1190, 1243, 1368, 1455, 1596, 2960. HRMS (ESI):  $m/z$  calculated for C<sub>13</sub>H<sub>19</sub>ClNO<sup>+</sup>: 240.1150 u; found: 240.1148 u.  $[\alpha]_D^{20} = -35.4^\circ$  (c 0.5, CHCl<sub>3</sub>). d.r. = 2 : 98 (*cis* : *trans*, **2i** isolated).

35I3b017.17.10.fid  
 AK Gansaeuer  
 Name Muehlhaus  
 fxm365\_F2  
 Nacht\_\_1H\_Standard C6D6 E:\ gansaeue 17

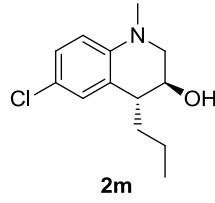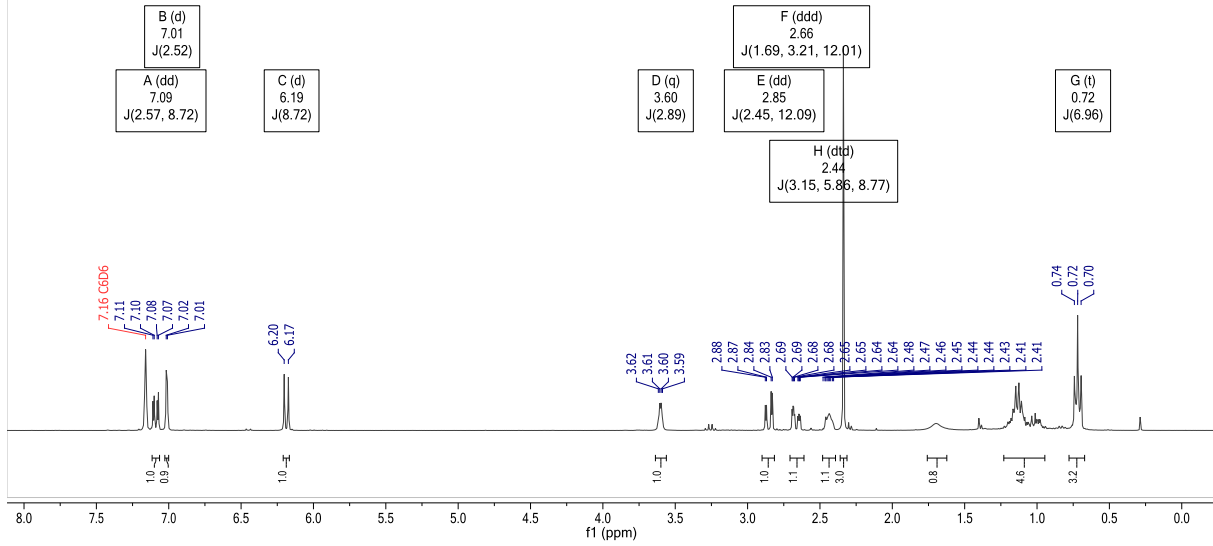

35I3b017.17.11.fid  
 AK Gansaeuer  
 Name Muehlhaus  
 fxm365\_F2  
 Nacht\_13C\_cpnd\_3k C6D6 E:\ gansaeue 17

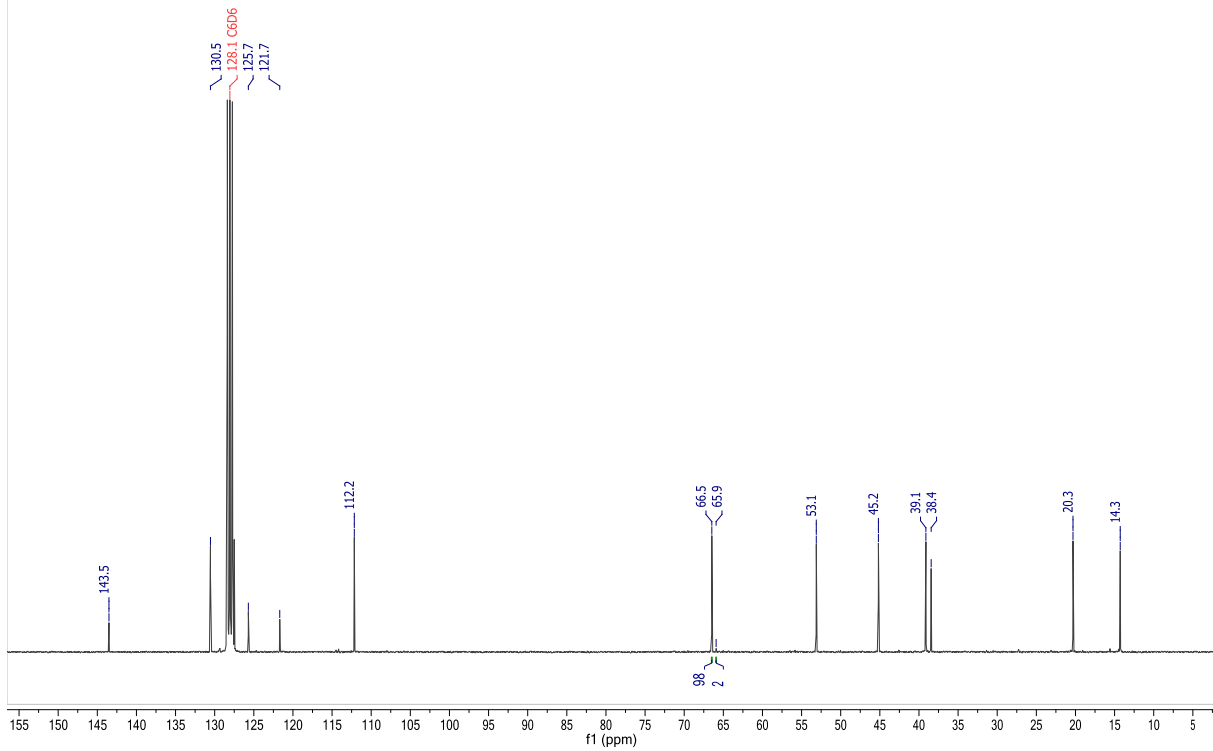

#### 4.3.11 Synthesis of Methyl-(3*S*,4*R*)-3-hydroxy-1-methyl-4-propyl-1,2,3,4-tetrahydroquinoline-6-carboxylate (**2n**).

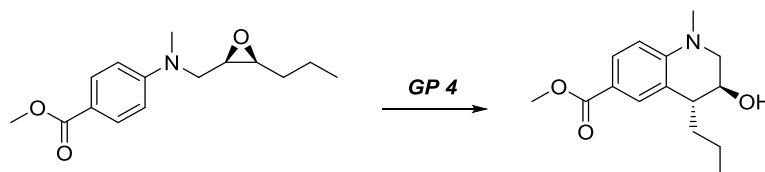

According to GP4: 132 mg of **1n** (1.00 eq., 0.50 mmol), 10 mg zinc (0.30 eq., 0.15 mmol) and 40 mg **cat-(OTs)<sub>2</sub>** (0.10 eq., 0.05 mmol) are reacted in dry THF for 48 hours at room temperature. Regio- and diastereoisomeric ratio were determined by <sup>13</sup>C-NMR of the crude product. Flash chromatography (SiO<sub>2</sub>, Eluent: CH : MTBE = 90 : 10) yielded 81 mg **2n** (d.r. = 98 : 2, 61%) as a viscous, yellow liquid.

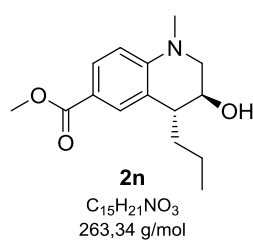

$R_f = 0.4$  (40% EE in CH); <sup>1</sup>H-NMR (500 MHz, C<sub>6</sub>D<sub>6</sub>, RT):  $\delta$  [ppm] = 0.75 (t,  $J = 7.1$  Hz, 3H), 1.01-1.33 (m, 4H), 2.43 (s, 3H), 2.53-2.64 (m, 2H), 2.80 (ddd,  $J = 12.7$  Hz,  $J = 2.7$  Hz,  $J = 1.8$  Hz, 1H), 3.01 (dd,  $J = 12.6$  Hz,  $J = 2.7$  Hz, 1H), 3.62 (s, 3H), 3.66 (q,  $J = 3.0$  Hz, 1H), 6.32 (d,  $J = 8.7$  Hz, 1H), 7.97 (d,  $J = 2.1$  Hz, 1H), 8.08 (dd,  $J = 8.7$  Hz,  $J = 2.1$  Hz, 1H). <sup>13</sup>C-NMR (125 MHz, C<sub>6</sub>D<sub>6</sub>, RT):  $\delta$  [ppm] = 14.3,

20.3, 38.2, 38.6, 45.0, 51.2, 53.1, 66.3, 109.6, 117.6, 122.6, 128.6, 130.3, 132.7, 148.4, 167.5. IR  $\tilde{\nu}$  [cm<sup>-1</sup>] = 797, 1064, 1114, 1152, 1190, 1203, 1223, 1235, 1269, 1288, 1402, 1528, 1603, 1674, 2890, 3439. HRMS (ESI):  $m/z$  calculated for [M+H]<sup>+</sup>: 264.1594 u; found: 264.1591 u.  $[\alpha]_D^{20} = -2.3^\circ$  (c 1, CHCl<sub>3</sub>).

49p5b008.17.10.fid  
 Pollux Bruker AV III 500 MHz Prodigy  
 AK Prof. Gansaeuer  
 Name Weissbarth  
 HW - 79.2D  
 \_1H\_Standard\_r Chlorbenzol E:\\ Gansaeue 8

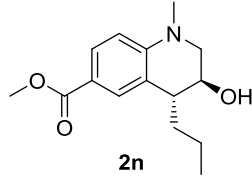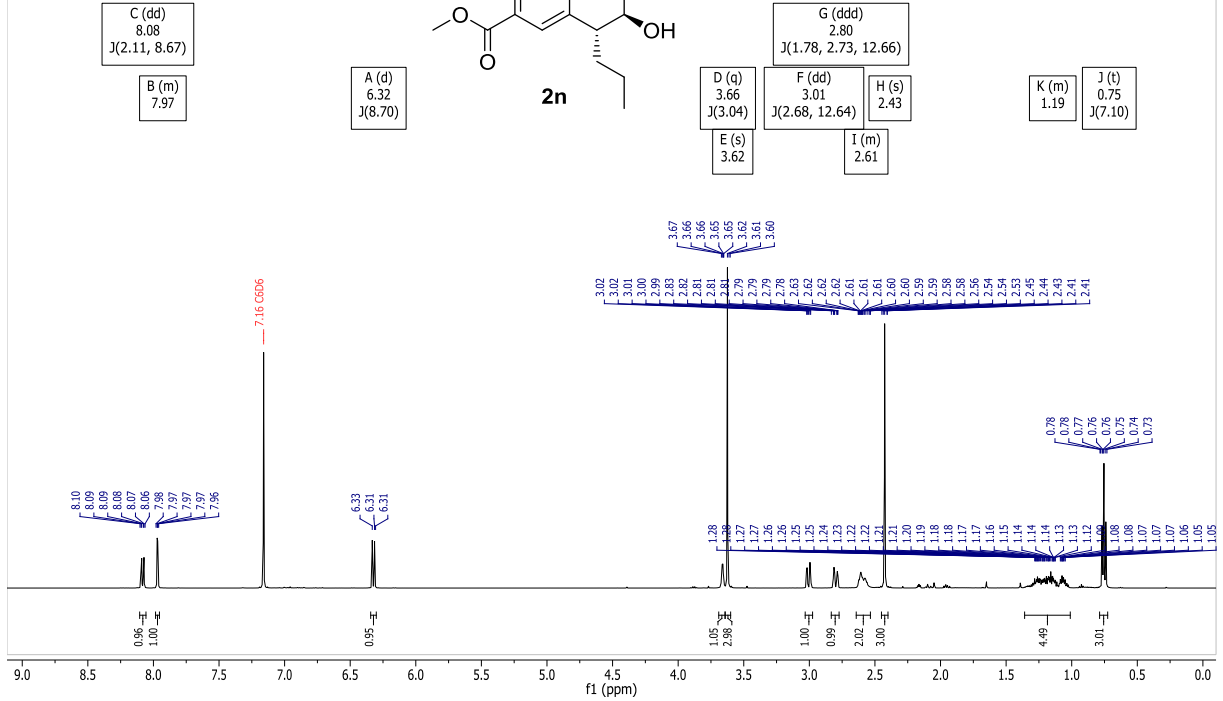

49p5b008.17.11.fid  
 Pollux Bruker AV III 500 MHz Prodigy  
 AK Prof. Gansaeuer  
 Name Weissbarth  
 HW - 79.2D  
 \_13C\_cpd\_r C6D6 E:\\ Gansaeue 8

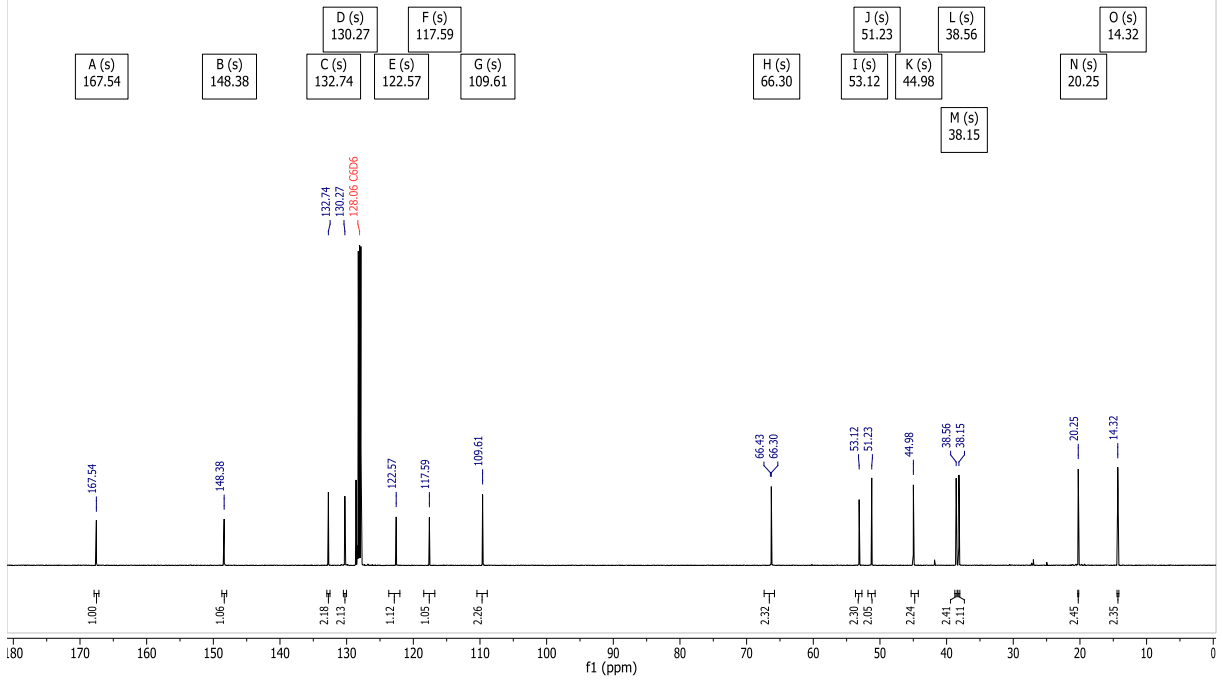

### 4.3.12 Synthesis of (3*S*,4*R*)-6-iodo-1-methyl-4-propyl-1,2,3,4-tetrahydroquinoline-3-ol (2o).

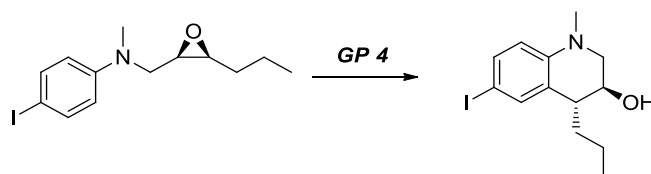

According to GP4: 156 mg of **1o** (1.00 eq., 0.50 mmol), 10 mg zinc (0.30 eq., 0.15 mmol) and 40 mg **cat-(OTs)<sub>2</sub>** (0.10 eq., 0.05 mmol) are reacted in dry THF for 48 hours at room temperature. Regio- and diastereoisomeric ratio were determined by <sup>13</sup>C-NMR of the crude product. Flash chromatography (SiO<sub>2</sub>, Eluent: CH : MTBE = 87 : 13) was performed rapidly and yielded 96 mg **2o** (d.r. = > 98 : < 2, 58%) as a viscous, yellow liquid.

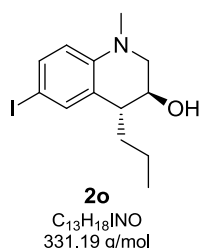

**R<sub>f</sub>** = 0.45 (40% EE in CH); **<sup>1</sup>H-NMR (300 MHz, C<sub>6</sub>D<sub>6</sub>, RT): δ [ppm]** = 0.71 (t, 3H, *J* = 7.0 Hz), 0.95-1.22 (m, 4H), 1.75-1.91 (*s<sub>br</sub>*, 1H), 2.34 (s, 3H), 2.37-2.44 (m, 1H), 2.67 (ddd, 1H, *J* = 12.1 Hz, *J* = 3.1 Hz, *J* = 1.7 Hz), 2.87 (dd, 1H, *J* = 12.2 Hz, *J* = 2.5 Hz), 3.58 (q, 1H, *J* = 2.9 Hz), 6.04 (d, 1H, *J* = 8.6 Hz), 7.31 (d, 1H, *J* = 2.2 Hz), 7.37 (dd, 1H, *J* = 8.6 Hz, *J* = 2.2 Hz). **<sup>13</sup>C-NMR (75 MHz, C<sub>6</sub>D<sub>6</sub>, RT): δ [ppm]** = 14.3, 20.3, 38.3, 39.1, 44.5, 53.0, 66.3, 77.6, 113.2, 126.7, 136.4, 139.0, 144.4. **IR ν̄ [cm<sup>-1</sup>]** = 524, 669, 793, 879, 1051, 1104, 1213, 1328, 1498, 2342, 2362. **HRMS (ESI): *m/z*** calculated for NaC<sub>13</sub>H<sub>18</sub>I<sub>1</sub>NO<sup>+</sup>: 354.0325 u; found: 354.0332 u. **[α]<sub>D</sub><sup>20</sup>** = -13.4° (c 5.0, CHCl<sub>3</sub>). d.r. = < 1 : > 99 (*cis* : *trans*, **2o** isolated).

46t4a027.17.10.fid  
 AK Prof. Gansaeuer  
 Name Muehlhaus  
 fxm394-pl-THQ  
 Terra Bruker Avance I 400 MHz  
 001\_H\_Standard C6D6 E:\ gansaeue 27

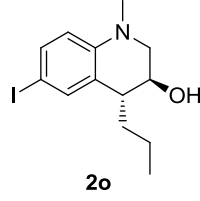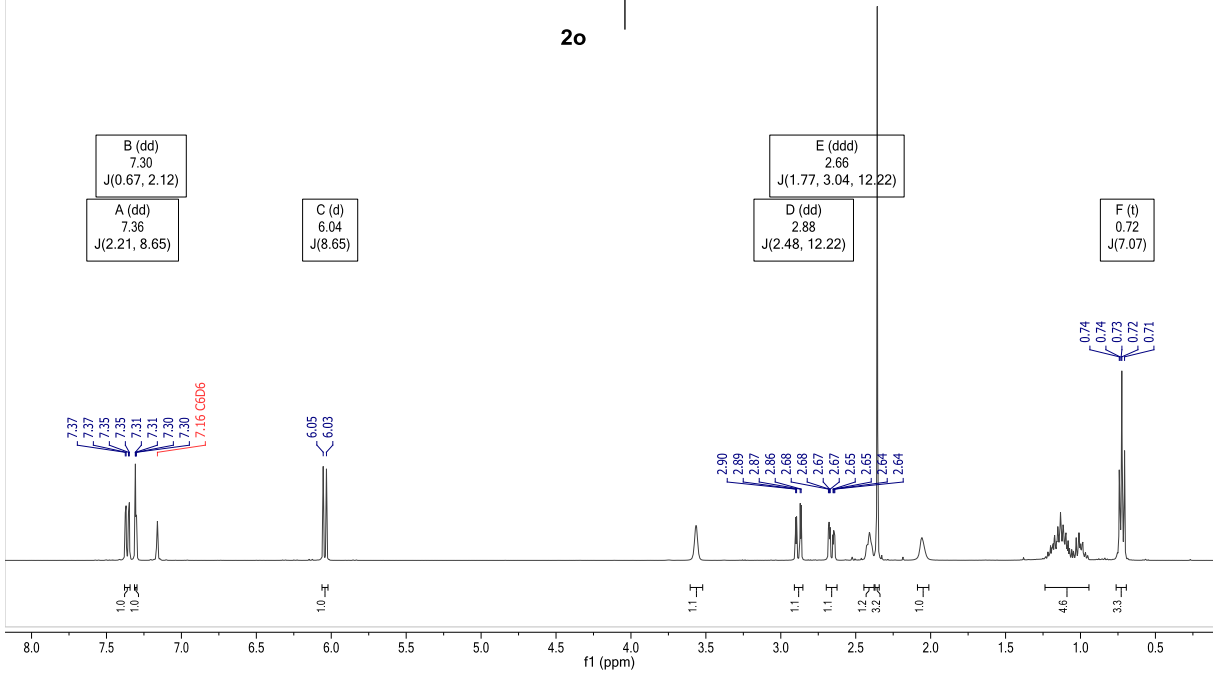

46t4a027.17.11.fid  
 AK Prof. Gansaeuer  
 Name Muehlhaus  
 fxm394-pl-THQ  
 Terra Bruker Avance I 400 MHz  
 013\_C\_cpd\_N C6D6 E:\ gansaeue 27

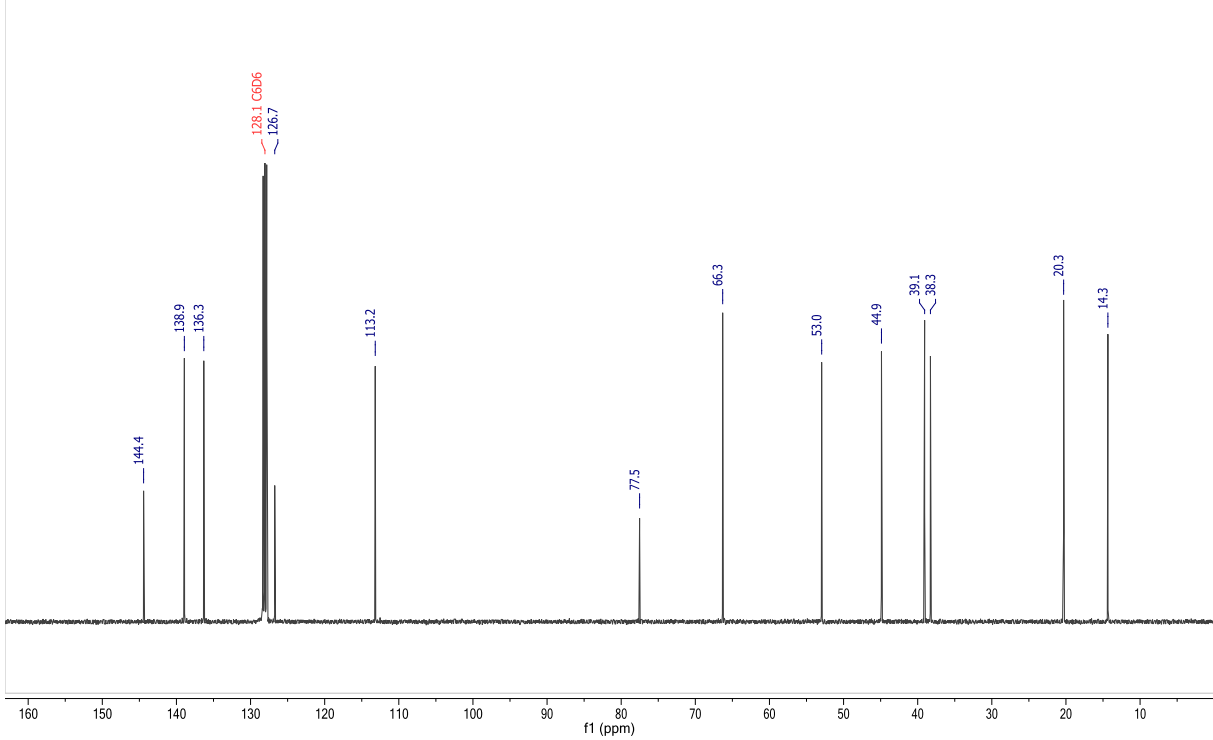

## 4.4. Synthesis of indolines 3 by REO-ArS<sub>R</sub>

### 4.4.1 (*S*)-1-((*R*)-1-phenylindolin-3-yl)-butan-1-ol (**3a**).

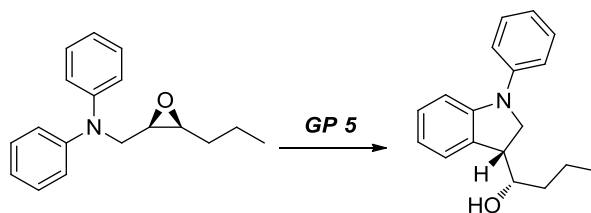

According to GP5: 134 mg of **1a** (1.00 eq., 0.50 mmol), 22 mg lutidinium chloride (0.30 eq., 0.15 mmol), 10 mg zinc (0.30 eq., 0.15 mmol) and 18 mg *ent-cat-Cl*<sub>2</sub> (0.07 eq., 0.035 mmol) are reacted in dry THF for 48 hours at room temperature. Regio- and diastereoisomeric ratio were determined by <sup>13</sup>C-NMR of the crude product. Flash chromatography (SiO<sub>2</sub>, Eluent: Ch : Mtbe = 87 : 13) yielded 96 mg **3a** (d.r. = > 98 : < 2, 72%) as colorless, crystalline solid (m.p. = 109 °C).

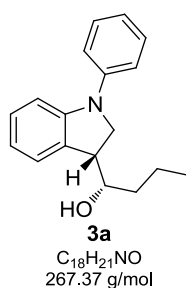

$R_f = 0.64$  (40% EE in CH), <sup>1</sup>H-NMR (300 MHz, C<sub>6</sub>D<sub>6</sub>, RT):  $\delta$  [ppm] = 0.84 (t, 3H,  $J = 7.2$  Hz), 1.13-1.38 (m, 4H), 1.38-1.45 (m, 1H), 3.00 (dt, 1H,  $J = 10.1$  Hz,  $J = 5.2$  Hz), 3.57 (t, 1H,  $J = 9.5$  Hz), 3.60-3.64 (m, 1H), 3.85 (dd, 1H,  $J = 9.4$  Hz,  $J = 6.1$  Hz), 6.70-6.76 (m, 1H), 6.86-6.91 (m, 1H), 7.02 (t, 1H,  $J = 7.2$  Hz), 7.11-7.17 (m, 3H), 7.20 (dd, 1H,  $J = 8.7$  Hz,  $J = 7.0$  Hz). <sup>13</sup>C-NMR (75 MHz, C<sub>6</sub>D<sub>6</sub>, RT):  $\delta$  [ppm] = 14.3, 19.5, 36.6, 46.7, 53.2, 71.9, 108.9, 118.1, 119.1, 121.3, 125.2, 129.5, 131.8, 144.5, 148.2.

IR  $\tilde{\nu}$  [cm<sup>-1</sup>] = 491, 497, 554, 616, 691, 735, 742, 961, 1014, 1065, 1079, 1120, 1247, 1288, 1333, 1383, 1460, 1882, 1501, 1589. HRMS (ESI):  $m/z$  calculated for C<sub>18</sub>H<sub>22</sub>NO<sup>+</sup>: 268.1696 u, found 267.1700 u.  $[\alpha]_D^{20} = -69.6$  (c 0.25, CHCl<sub>3</sub>). determination of e.r. (**3a**, isolated) by HPLC: DAICEL Chiralpak IC-U 01; *n*-Hexane/*i*PrOH (95 : 5); flowrate 0.43 mL/min;  $t_R = 2.5$  min (major),  $t_R = 2.8$  min (minor); e.r. = > 99 : < 1.

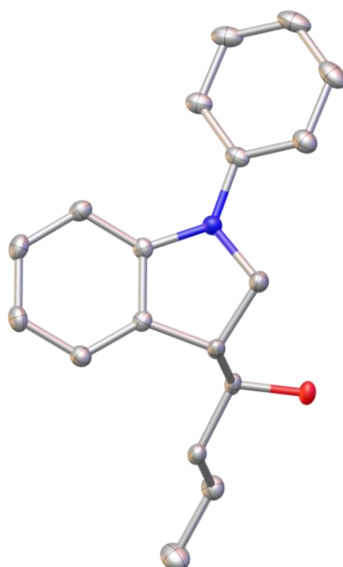



0613b020.18.10.fid  
AK Gansaeuer  
Name Muehlhaus  
fxm436\_F1  
Nacht\_\_1H\_Standard C6D6 E:\ gansaeue 20

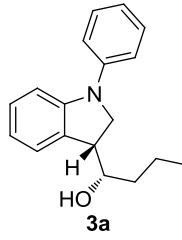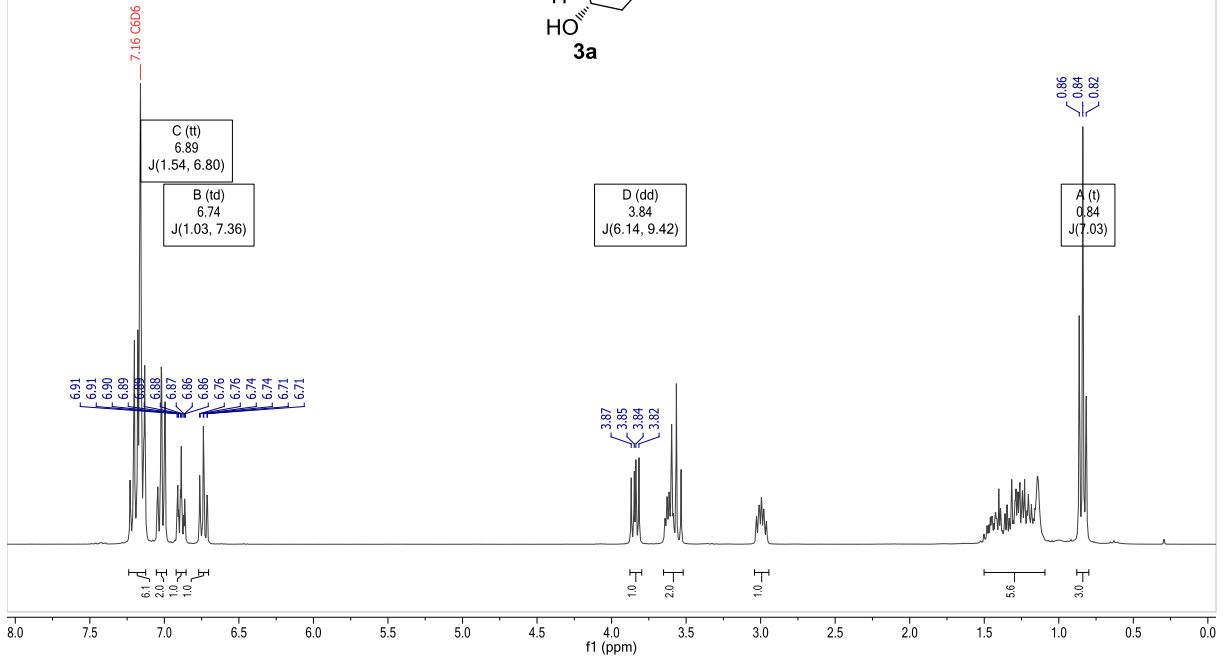

4714a074.17.11.fid  
AK Prof. Gansaeuer  
Name Muehlhaus  
fxm401\_F1\_Indolin  
Terra Bruker Avance I 400 MHz  
013\_C\_cpnd\_N C6D6 E:\ gansaeue 74

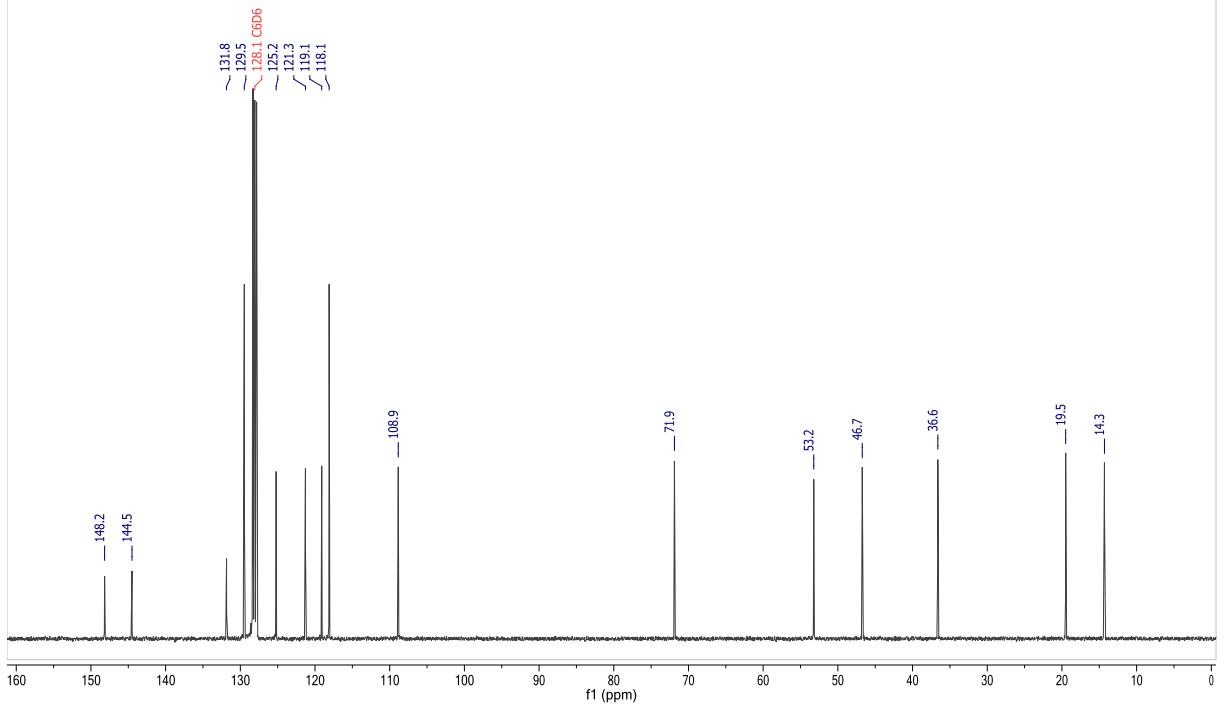

#### 4.4.2 Synthesis of (*S*)-1-((*R*)-1-phenylindolin-3-yl)-hexan-1-ol (**3b**).

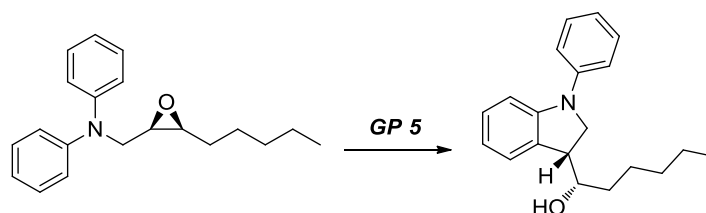

According to GP5: 148 mg of **1b** (1.00 eq., 0.50 mmol), 22 mg lutidinium chloride (0.30 eq., 0.15 mmol), 10 mg zinc (0.30 eq., 0.15 mmol) and 18 mg *ent*-cat-Cl<sub>2</sub> (0.07 eq., 0.035 mmol) are reacted in dry THF for 48 hours at room temperature. Regio- and diastereoisomeric ratio were determined by <sup>13</sup>C-NMR of the crude product. Flash chromatography (SiO<sub>2</sub>, Eluent: Ch : Mtbe = 87 : 13) yielded 111 mg **3b** (d.r. = > 98 : < 2, 75%) as colorless, crystalline solid (m.p. = 115 °C).

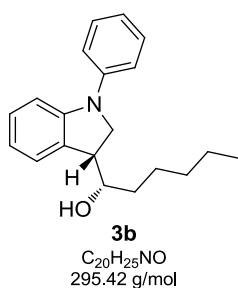

$R_f = 0.7$  (40% EE in CH), <sup>1</sup>H-NMR (300 MHz, C<sub>6</sub>D<sub>6</sub>, RT):  $\delta$  [ppm] = 0.90 (t, 3H,  $J = 6.9$  Hz), 1.12 (d, 1H,  $J = 3.9$  Hz), 1.14-1.50 (m, 8H), 2.98 (m, 1H), 3.55-3.08 (m, 2H), 3.87 (dd, 1H,  $J = 9.4$  Hz,  $J = 6.1$  Hz), 6.70-6.76 (m, 1H), 6.86-6.91 (m, 1H), 7.02 (t, 1H,  $J = 7.2$  Hz), 7.11-7.17 (m, 3H), 7.20 (dd, 1H,  $J = 8.7$  Hz,  $J = 7.0$  Hz). <sup>13</sup>C-NMR (75 MHz, C<sub>6</sub>D<sub>6</sub>, RT):  $\delta$  [ppm] = 14.4, 23.1, 26.1, 32.3, 33.6, 46.8, 53.3, 72.2, 108.9, 118.2, 119.2, 121.3, 125.2, 129.5, 131.9, 144.6, 148.2.

IR  $\tilde{\nu}$  [cm<sup>-1</sup>] = 618, 694, 728, 736, 744, 752, 1332, 1382, 1460, 1483, 1501, 1591, 2360, 2913. HRMS (ESI):  $m/z$  calculated for C<sub>20</sub>H<sub>26</sub>NO<sup>+</sup>: 296.2009 u, found: 296.2012 u.  $[\alpha]_D^{20} = -68.0$  (c 0.25, CHCl<sub>3</sub>).

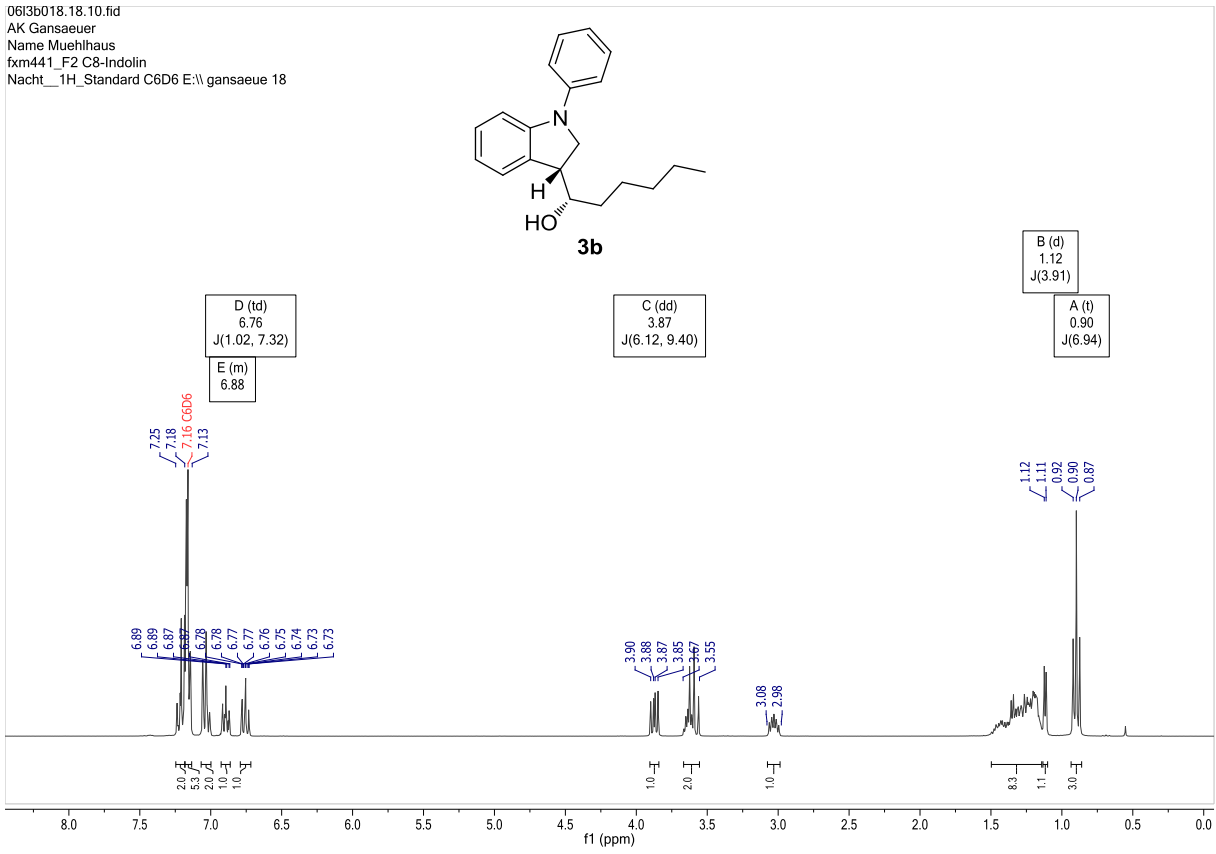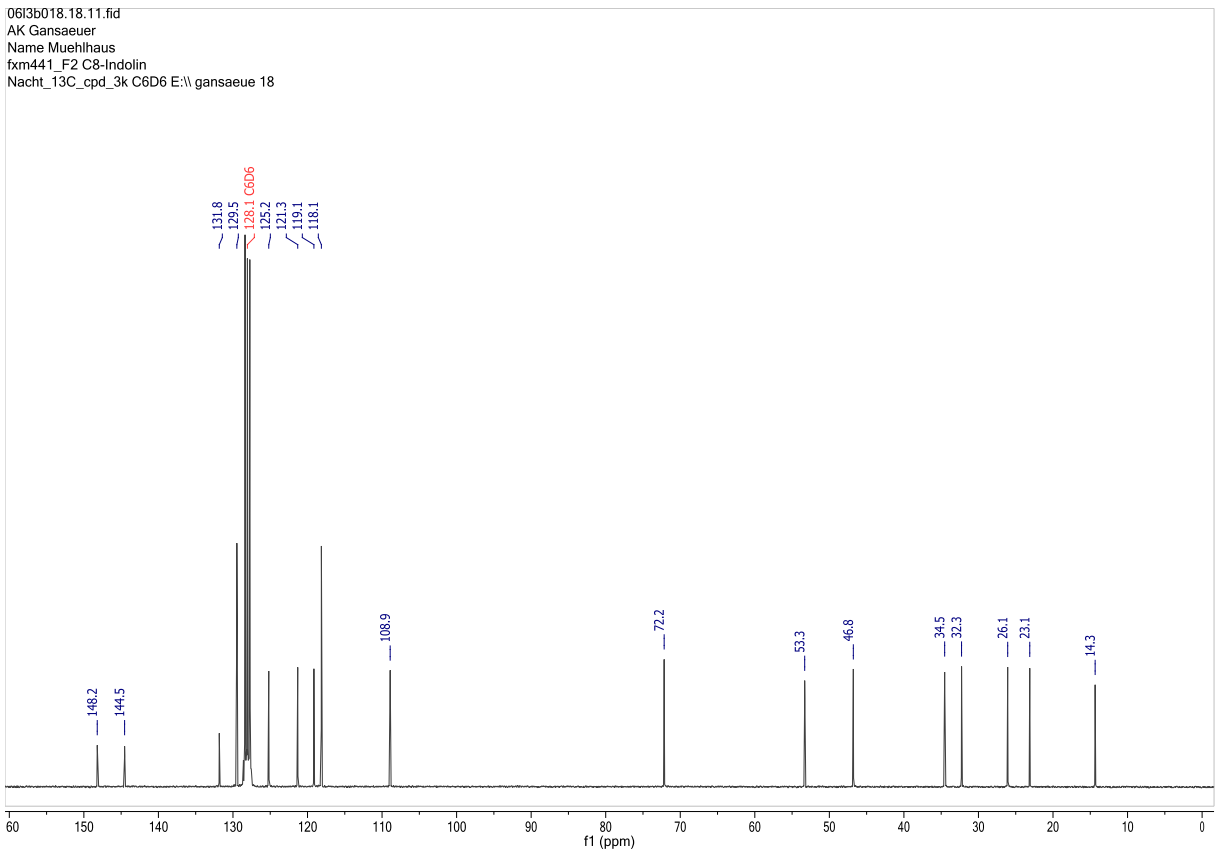

#### 4.4.3 Synthesis of (*S*)-3-methyl-1-((*R*)-1-phenylindolin-3-yl)-butan-1-ol (**3c**).

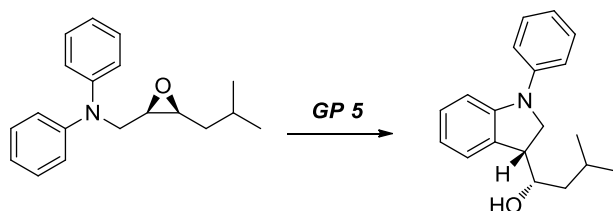

According to GP5: 141 mg of **1c** (1.00 eq., 0.50 mmol), 22 mg lutidinium chloride (0.30 eq., 0.15 mmol), 10 mg zinc (0.30 eq., 0.15 mmol) and 18 mg *ent-cat-Cl*<sub>2</sub> (0.07 eq., 0.035 mmol) are reacted in dry THF for 48 hours at room temperature. Regio- and diastereoisomeric ratio were determined by <sup>13</sup>C-NMR of the crude product. Flash chromatography (SiO<sub>2</sub>, Eluent: Ch : Mtbe = 87 : 13) yielded 85 mg **3c** (d.r. = > 98 : < 2, 60%) as colorless, crystalline solid (m.p. = 66 °C).

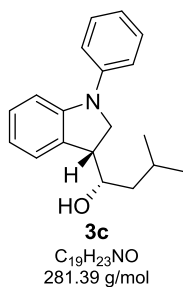

$R_f = 0.2$  (30% Et<sub>2</sub>O in CH), <sup>1</sup>H-NMR (300 MHz, C<sub>6</sub>D<sub>6</sub>, RT):  $\delta$  [ppm] = 0.82 (d, 3H,  $J = 6.6$  Hz), 0.89 (d, 3H,  $J = 6.6$  Hz), 1.04-1.13 (m, 1H), 1.31-1.40 (m, 1H), 1.75 (sept, 1H,  $J = 6.5$  Hz), 3.00 (ddd, 1H,  $J = 10.1$  Hz,  $J = 6.3$  Hz,  $J = 3.9$  Hz), 3.56 (t, 1H,  $J = 9.5$  Hz), 3.80 (dd, 1H,  $J = 8.5$  Hz,  $J = 5.1$  Hz), 6.70 (dd, 1H,  $J = 8.7$  Hz,  $J = 5.7$  Hz), 6.88 (td, 1H,  $J = 7.0$  Hz,  $J = 1.6$  Hz), 7.11-7.22 (m, 5H). <sup>13</sup>C-NMR (75 MHz, C<sub>6</sub>D<sub>6</sub>, RT):  $\delta$  [ppm] = 22.0, 23.9, 24.9, 43.5, 47.1, 53.0, 70.2, 108.9, 118.2, 119.1, 121.3, 125.1, 128.4, 129.5, 131.8, 144.5, 148.2. IR  $\tilde{\nu}$  [cm<sup>-1</sup>] = 496, 531, 583, 692, 743, 755, 967, 1020, 1168, 1081, 1139, 1206, 1247, 1289, 1312, 1334, 1382, 1457, 1499, 1587. HRMS (ESI):  $m/z$  calculated for C<sub>19</sub>H<sub>24</sub>NO<sup>+</sup>: 282.1852 u, found 282.1848 u.  $[\alpha]_D^{20} = -62.0$  (c 1.0, CHCl<sub>3</sub>).

2213a008.18.10.fid  
AK Gansaeuer  
Name Muehlhaus  
ML-20.2  
Tag\_\_1H\_Standard C6D6 E:\ gansaeue 8

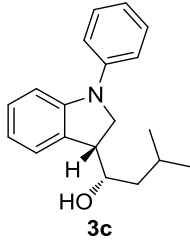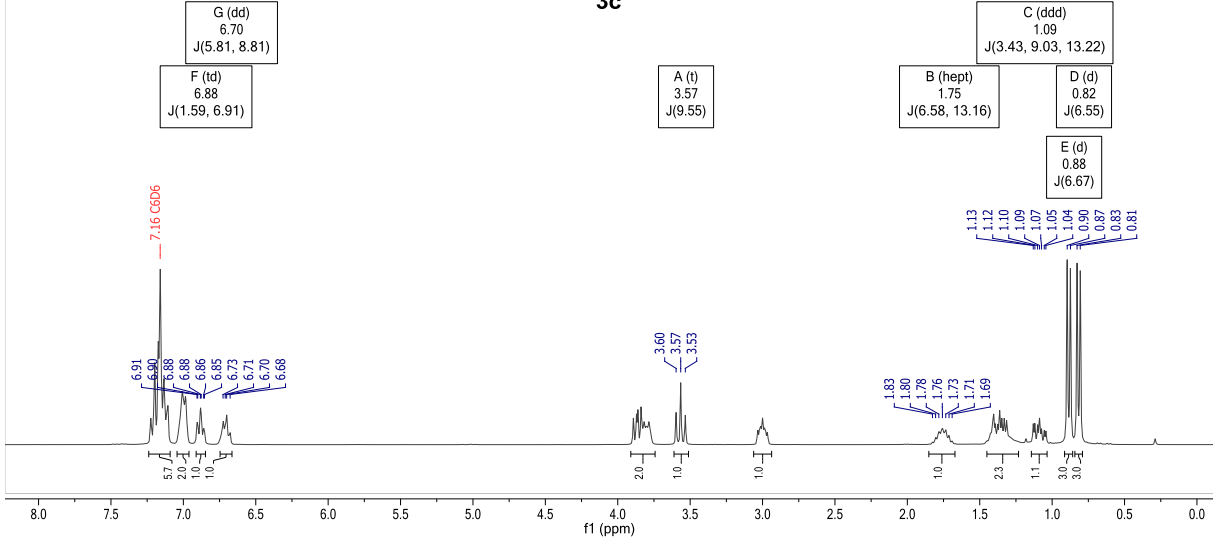

2213a008.18.11.fid  
AK Gansaeuer  
Name Muehlhaus  
ML-20.2  
Nacht\_13C\_cpd\_3k C6D6 E:\ gansaeue 8

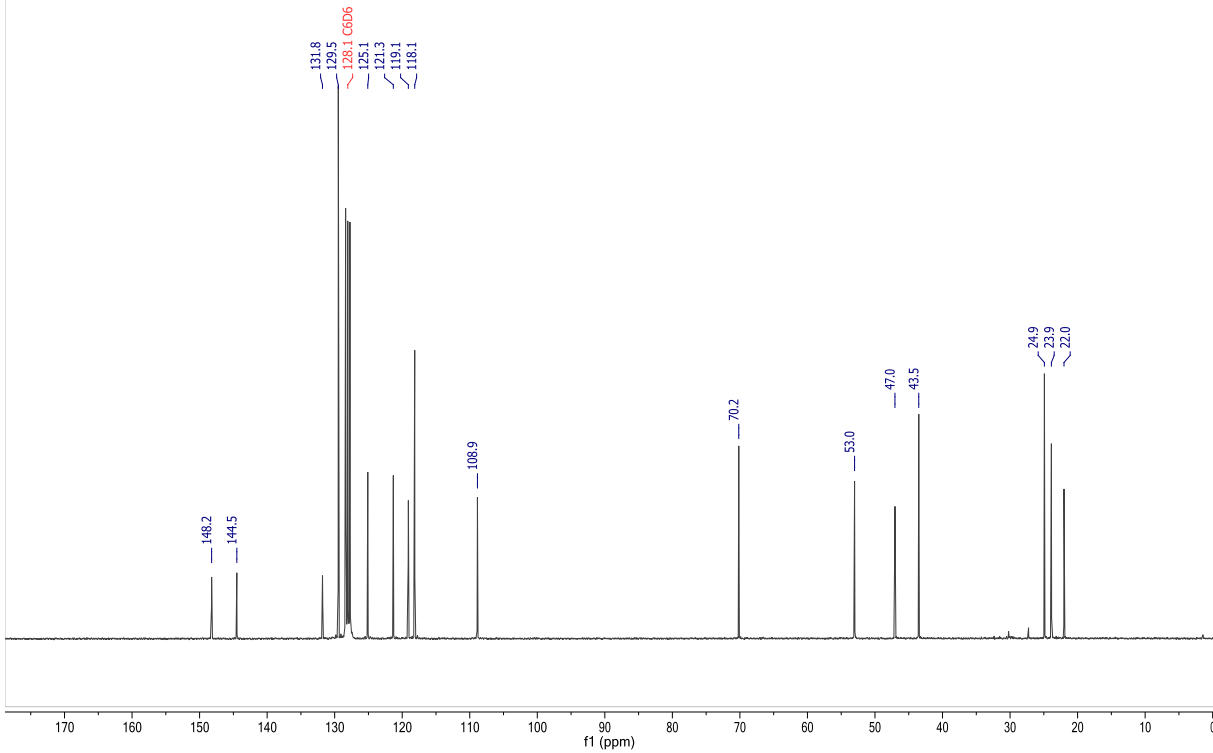

#### 4.4.4 Synthesis of (*S*)-1-((*R*)-1-cyclohexylindolin-3-yl)-butan-1-ol (**3d**).

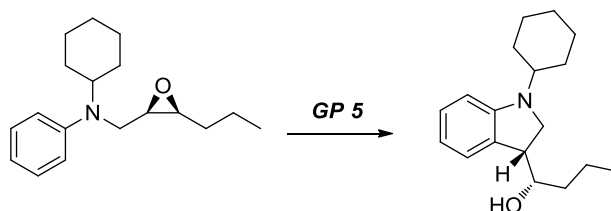

According to GP5: 144 mg of **1d** (1.00 eq., 0.50 mmol), 22 mg lutidinium chloride (0.30 eq., 0.15 mmol), 10 mg zinc (0.30 eq., 0.15 mmol) and 18 mg *ent-cat-Cl*<sub>2</sub> (0.07 eq., 0.035 mmol) are reacted in dry THF for 48 hours at room temperature. Regio- and diastereoisomeric ratio were determined by <sup>13</sup>C-NMR of the crude product. Flash chromatography (SiO<sub>2</sub>, Eluent: Ch : Mtbe = 87 : 13) yielded 81 mg **3d** (d.r. = > 98 : < 2, 56%) as colorless, crystalline solid.

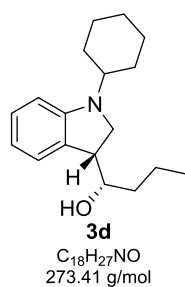

**R<sub>f</sub>** = 0.50 (20% Et<sub>2</sub>O in CH); **<sup>1</sup>H-NMR (300 MHz, C<sub>6</sub>D<sub>6</sub>, RT): δ [ppm]** = 0.89 (t, 3H, *J* = 7.1 Hz), 1.05-1.57 (m, 10H), 1.59-1.81 (m, 4H), 3.07 (ddd, 1H, *J* = 9.5 Hz, *J* = 7.1 Hz, *J* = 3.8 Hz), 3.16-3.28 (m, 2H), 3.45 (dd, 1H, *J* = 8.6 Hz, *J* = 7.1 Hz), 3.79 (dt, 1H, *J* = 8.2 Hz, *J* = 3.8 Hz), 3.85 (dd, 1H, *J* = 9.4 Hz, *J* = 6.1 Hz), 6.37 (d, 1H, *J* = 7.9 Hz), 6.70 (ddd, 1H, *J* = 7.3 Hz, *J* = 7.3 Hz, *J* = 1.0 Hz), 7.00 (dt, 1H, *J* = 7.4 Hz, *J* = 1.2 Hz), 7.10-7.14 (m, 1H). **<sup>13</sup>C-NMR (75 MHz, C<sub>6</sub>D<sub>6</sub>, RT): δ [ppm]** = 14.4, 19.7, 26.2, 26.3, 28.3, 29.5, 36.9, 47.1, 47.5, 54.8, 71.9, 107.4, 117.0, 124.5, 128.6, 130.3, 152.5. **IR ν [cm<sup>-1</sup>]** = 456, 676, 734, 1008, 1028, 1072, 1160, 1242, 1272, 1393, 1457, 1489, 1603, 2854, 2927. **HRMS (ESI): *m/z*** calculated for C<sub>18</sub>H<sub>28</sub>NO<sup>+</sup> : 274.2165 u, found: 274.2168 u. **[α]<sub>D</sub><sup>20</sup>** = -51.8 (c 0.25, CHCl<sub>3</sub>).

0113b001.18.10.fid  
 AK Gansaeuer  
 Name Muehlhaus  
 fxm417\_F1  
 Nacht\_\_1H\_Standard C6D6 E:\ gansaeue 1

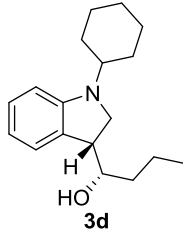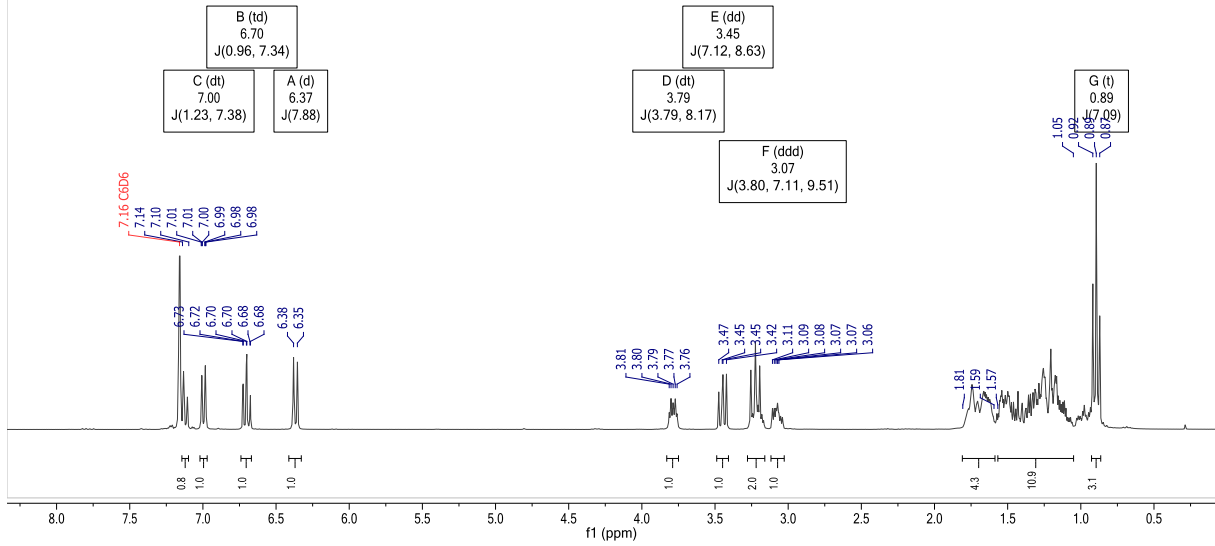

0113b001.18.11.fid  
 AK Gansaeuer  
 Name Muehlhaus  
 fxm417\_F1  
 Nacht\_T3C\_cpd\_3k C6D6 E:\ gansaeue 1

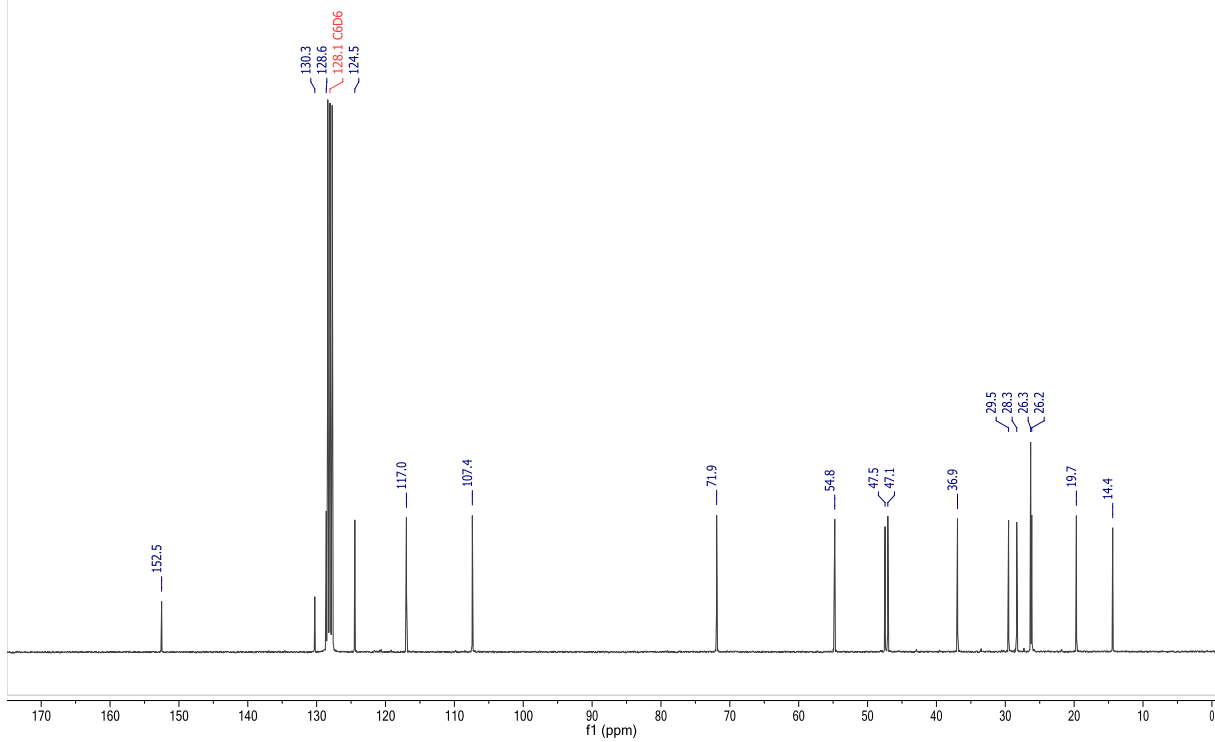

#### 4.4.5 Synthesis of (*S*)-1-((*R*)-1-isopropylindolin-3-yl)-butan-1-ol (**3e**).

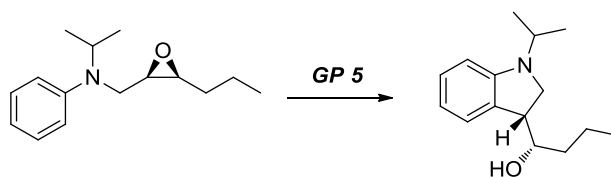

According to GP5: 117 mg of **1e** (1.00 eq., 0.50 mmol), 22 mg lutidinium chloride (0.30 eq., 0.15 mmol), 10 mg zinc (0.30 eq., 0.15 mmol) and 18 mg *ent*-cat-Cl<sub>2</sub> (0.07 eq., 0.035 mmol) are reacted in dry THF for 48 hours at room temperature. Regio- and diastereoisomeric ratio were determined by <sup>13</sup>C-NMR of the crude product. Flash chromatography (SiO<sub>2</sub>, Eluent: Ch : Mtbe = 87 : 13) yielded 63 mg **3e** (d.r. = > 98 : < 2, 54%) as colorless, crystalline solid.

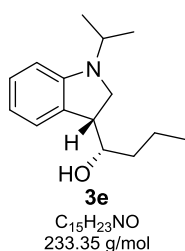

$R_f = 0.33$  (20% Et<sub>2</sub>O in CH), <sup>1</sup>H-NMR (300 MHz, C<sub>6</sub>D<sub>6</sub>, RT):  $\delta$  [ppm] = 0.88 (t, 3H,  $J = 7.1$  Hz), 0.96 (dd, 6H,  $J = 6.7$  Hz,  $J = 1.9$  Hz), 1.17-1.61 (m, 4H), 3.05 (ddd, 1H,  $J = 9.3$  Hz,  $J = 7.0$  Hz,  $J = 3.8$  Hz), 3.15 (dd, 1H,  $J = 9.5$  Hz,  $J = 8.4$  Hz), 3.39 (dd, 1H,  $J = 8.4$  Hz,  $J = 6.9$  Hz), 3.57 (hept, 1H,  $J = 6.7$  Hz), 3.77 (dt, 1H,  $J = 7.9$  Hz,  $J = 3.7$  Hz), 6.34 (d, 1H,  $J = 7.9$  Hz), 6.71 (ddd, 1H,  $J = 7.4$  Hz,  $J = 7.4$  Hz,  $J = 1.0$  Hz), 6.98 (ddd, 1H,  $J = 7.3$  Hz,  $J = 1.2$  Hz), 7.12 (dd, 1H,  $J = 7.8$  Hz,  $J = 1.9$  Hz). <sup>13</sup>C-NMR (75 MHz, C<sub>6</sub>D<sub>6</sub>, RT):  $\delta$  [ppm] = 14.4, 17.6, 18.6, 19.7, 36.9, 46.0, 46.2, 46.9, 71.9, 107.6, 117.2, 124.4, 128.6, 130.4, 152.6. IR  $\tilde{\nu}$  [cm<sup>-1</sup>] = 427, 453, 525, 741, 995, 1026, 1070, 1120, 1195, 1240, 1266, 1363, 1392, 1458, 1488, 1604, 2870, 2929, 2960. HRMS (ESI):  $m/z$  calculated for C<sub>15</sub>H<sub>24</sub>NO<sup>+</sup>: 234.1852 u, found: 234.1850 u.  $[\alpha]_D^{20} = -36.0$  (c 0.5, CHCl<sub>3</sub>).



17i3d007.18.10.fid  
 AK Gansaeuer  
 Name Muehlhaus  
 fxm461\_F1 N-iPr-Indolin  
 Nacht\_\_1H\_Standard C6D6 E:\ gansaeue 7

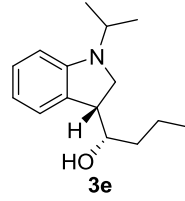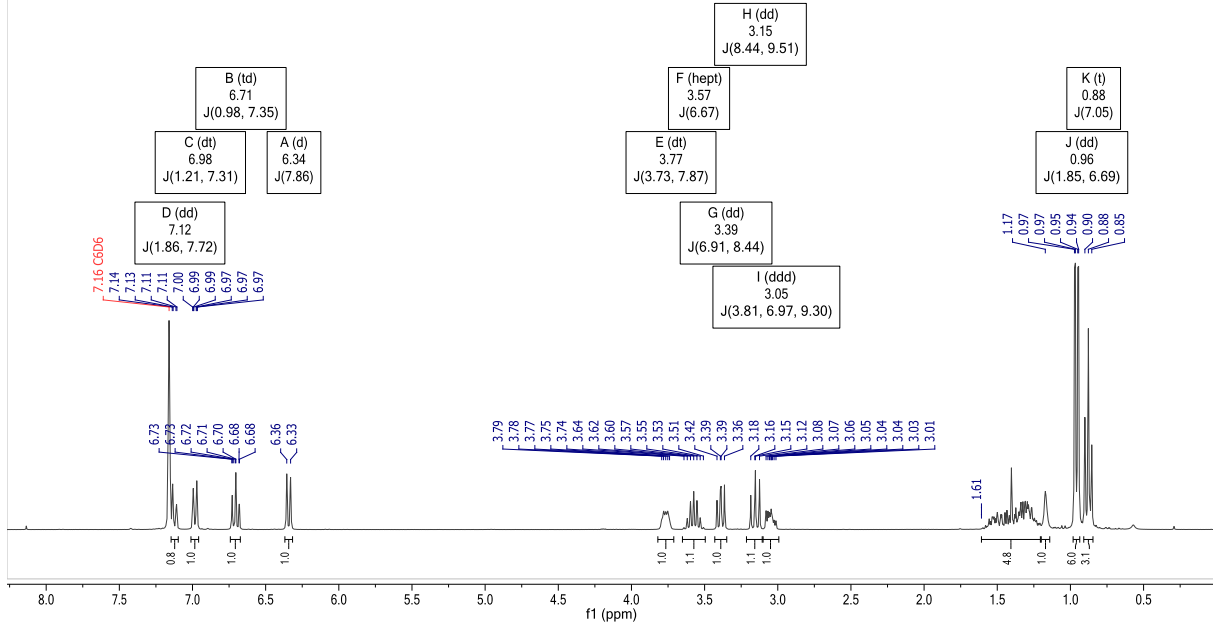

17i3d007.18.11.fid  
 AK Gansaeuer  
 Name Muehlhaus  
 fxm461\_F1 N-iPr-Indolin  
 Nacht\_T3C\_cpd\_3k C6D6 E:\ gansaeue 7

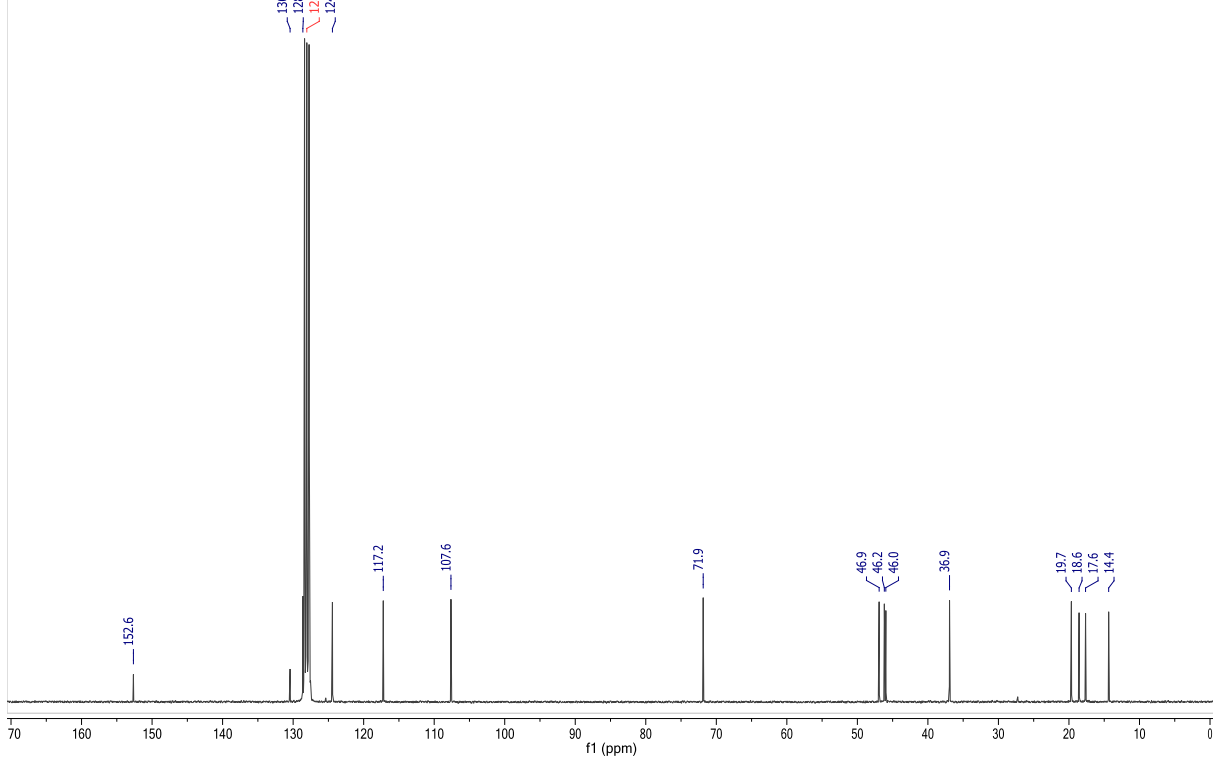

#### 4.4.6 Synthesis of (*S*)-1-((*R*)-5-chloro-1-cyclohexylindolin-3-yl)butan-1-ol (**3h**).

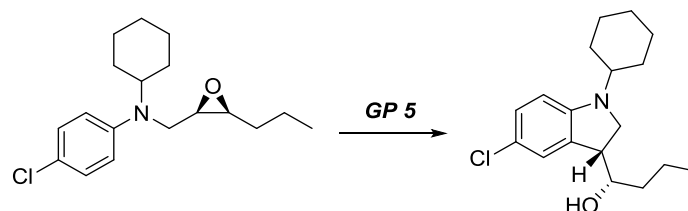

According to GP5: 154 mg of **1h** (1.00 eq., 0.50 mmol), 22 mg lutidinium chloride (0.30 eq., 0.15 mmol), 10 mg zinc (0.30 eq., 0.15 mmol) and 18 mg *ent-cat-Cl<sub>2</sub>* (0.07 eq., 0.035 mmol) are reacted in dry THF for 48 hours at room temperature. Regio- and diastereoisomeric ratio were determined by <sup>13</sup>C-NMR of the crude product. Flash chromatography (SiO<sub>2</sub>, Eluent: CH : MTBE = 90 : 10) yielded 88 mg **3h** (d.r. = > 98 : < 2, 57%) as colorless, viscous oil.

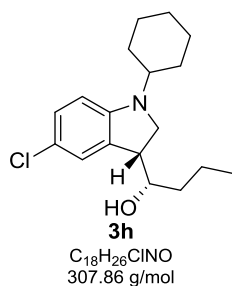

$R_f = 0.6$  (20% EE in CH), <sup>1</sup>H-NMR (400 MHz, C<sub>6</sub>D<sub>6</sub>, RT):  $\delta$  [ppm] = 0.85 (t,  $J = 7.1$  Hz, 3H), 0.89-1.70 (m, 15H), 2.90 (ddd,  $J = 10.3$  Hz,  $J = 7.5$  Hz,  $J = 3.6$  Hz, 1H), 3.04 (tt,  $J = 10.9$  Hz,  $J = 3.3$  Hz, 1H), 3.13 (dd,  $J = 9.8$  Hz,  $J = 8.8$  Hz, 1H), 3.36 (dd,  $J = 8.7$  Hz,  $J = 7.3$  Hz, 1H), 3.56 (dt,  $J = 8.9$  Hz,  $J = 3.6$  Hz, 1H), 6.04 (d,  $J = 8.4$  Hz, 1H), 7.00 (dd,  $J = 2.2$  Hz,  $J = 1.1$  Hz, 1H), 7.08 (dd,  $J = 8.4$  Hz,  $J = 2.2$  Hz, 1H). <sup>13</sup>C-NMR (125.5 MHz, C<sub>6</sub>D<sub>6</sub>, RT):  $\delta$  [ppm] = 14.3, 19.6, 26.0, 26.2, 28.1, 29.5, 36.8, 46.7, 47.5, 54.8, 71.6, 107.7, 121.2, 124.8, 128.2, 132.4, 151.0. IR  $\tilde{\nu}$  [cm<sup>-1</sup>] = 444, 475, 525, 551, 576, 603, 682, 715, 738, 795, 841, 885, 959, 1008, 1028, 1073, 1110, 1125, 1144, 1166, 1243, 1269, 1304, 1344, 1385, 1422, 1450, 1488, 1599, 2853, 2926, 3279; HRMS (ESI):  $m/z$  calculated for [M+H]<sup>+</sup> 308.1776 u found: 308.1773 u;  $[\alpha]_D^{20} = -2.4$  (c 1, CHCl<sub>3</sub>).

16c5a027.19.10.fid  
 Instrument Bruker Avance I 500 MHz  
 AK Prof. Gansaeuer  
 Name Weissbarth  
 Title HW-181-S2F1  
 001\_H\_N C6D6 E:\\ gansaeue 27

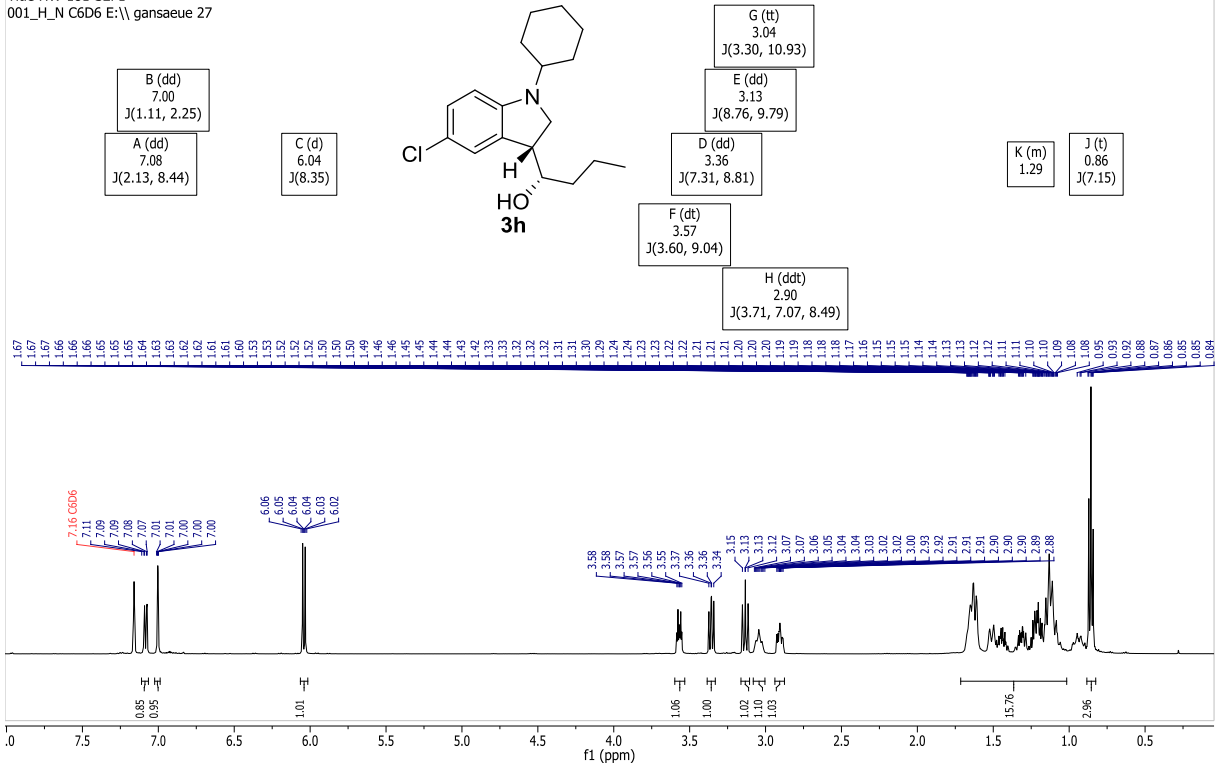

16c5a027.19.11.fid  
 Instrument Bruker Avance I 500 MHz  
 AK Prof. Gansaeuer  
 Name Weissbarth  
 Title HW-181-S2F1  
 013\_C\_cpd C6D6 E:\\ gansaeue 27

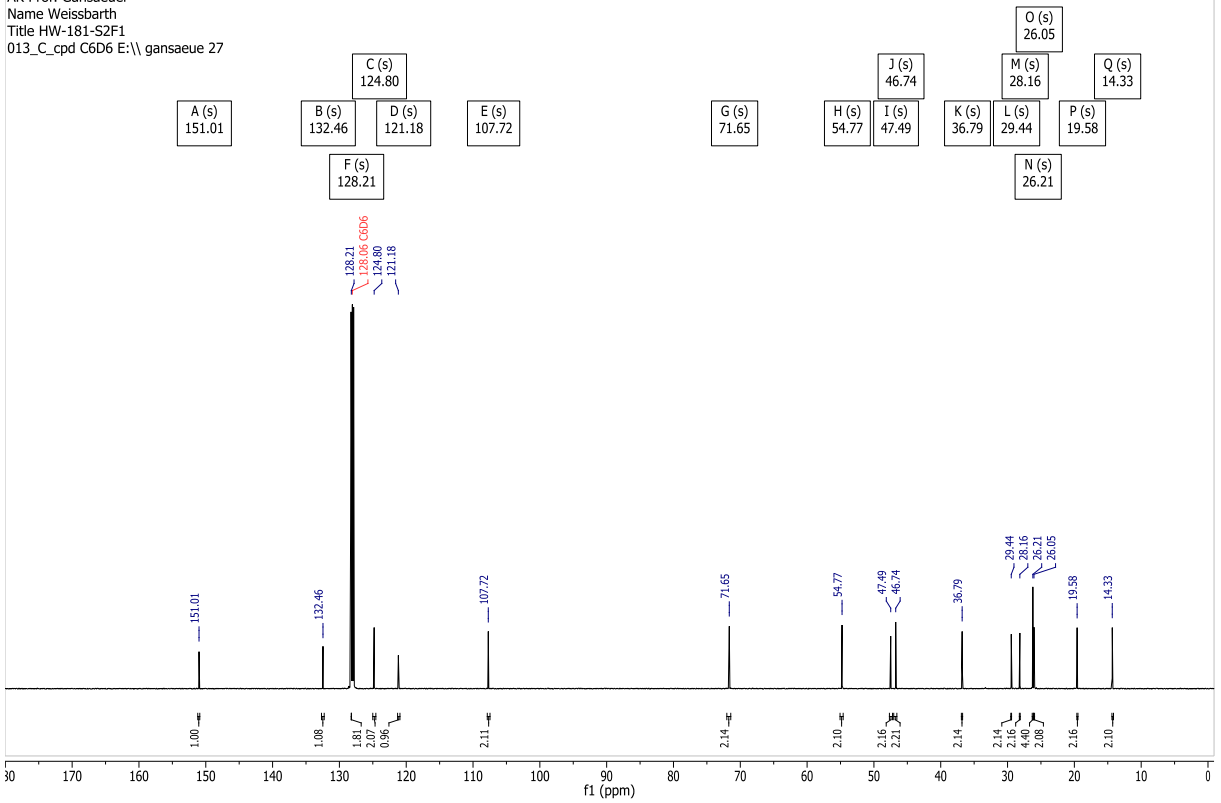

#### 4.4.7 Synthesis of (*S*)-1-((*R*)-5-chloro-1-cyclopentylindolin-3-yl)butan-1-ol (**3i**).

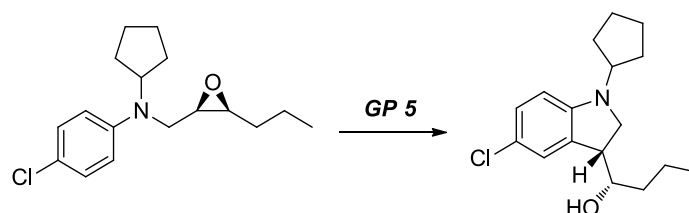

According to GP5: 147 mg of **1i** (1.00 eq., 0.50 mmol), 22 mg lutidinium chloride (0.30 eq., 0.15 mmol), 10 mg zinc (0.30 eq., 0.15 mmol) and 18 mg *ent*-cat-Cl<sub>2</sub> (0.07 eq., 0.035 mmol) are reacted in dry THF for 48 hours at room temperature. Regio- and diastereoisomeric ratio were determined by <sup>13</sup>C-NMR of the crude product. Flash chromatography (SiO<sub>2</sub>, Eluent: CH : MTBE = 90 : 10) yielded 85 mg **3i** (d.r. = > 98 : < 2, 58%) as colorless, viscous oil.

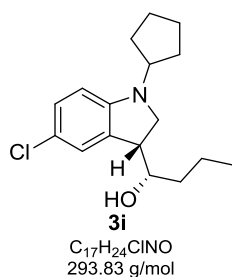

$R_f = 0.5$  (20% EE in CH), <sup>1</sup>H-NMR (400 MHz, C<sub>6</sub>D<sub>6</sub>, RT):  $\delta$  [ppm] = 0.84 (t,  $J = 7.1$  Hz, 3H), 1.05 (s<sub>br</sub>, 1H) 1.14-1.53 (m, 10H), 1.54-1.66 (m, 2H) 2.84-2.92 (m, 1H), 3.11 (t,  $J = 9.1$  Hz, 1H) 3.35 (dd,  $J = 8.7$  Hz,  $J = 7.3$  Hz, 1H), 3.55 (td,  $J = 7.4$  Hz,  $J = 3.7$  Hz, 2H), 6.11 (d,  $J = 8.4$  Hz, 1H), 6.99 (dd,  $J = 2.2$  Hz,  $J = 1.1$  Hz, 1H), 7.09 (dd,  $J = 8.4$  Hz,  $J = 2.2$  Hz, 1H). <sup>13</sup>C-NMR (125.5 MHz, C<sub>6</sub>D<sub>6</sub>, RT):  $\delta$  [ppm] = 14.3, 19.6, 24.4, 24.5, 27.8, 28.6, 36.9, 46.8, 48.5, 57.9, 71.4, 108.2, 121.6, 124.6, 128.3, 132.7, 152.1. IR  $\tilde{\nu}$  [cm<sup>-1</sup>] = 430, 527, 594, 678, 711, 739, 799, 847, 875, 960, 1004, 1073, 1125, 1195, 1260, 1354, 1393, 1421, 1464, 1487, 1599, 2869, 2955, 3398; HRMS (ESI):  $m/z$  calculated for [M+H]<sup>+</sup>: 294.1619 u found: 294.1616 u;  $[\alpha]_D^{20} = -32.4^\circ$  (c 1, CHCl<sub>3</sub>).

03t4b055.19.10.fid  
 Instrument Bruker AV I 400 MHz  
 AK Prof. Gansaeuer  
 Name Weissbarth  
 Titel HW-179p  
 001\_H\_N C6D6 E:\\ gansaeue 55

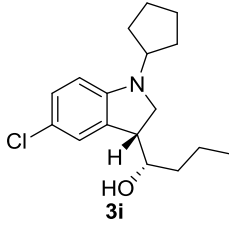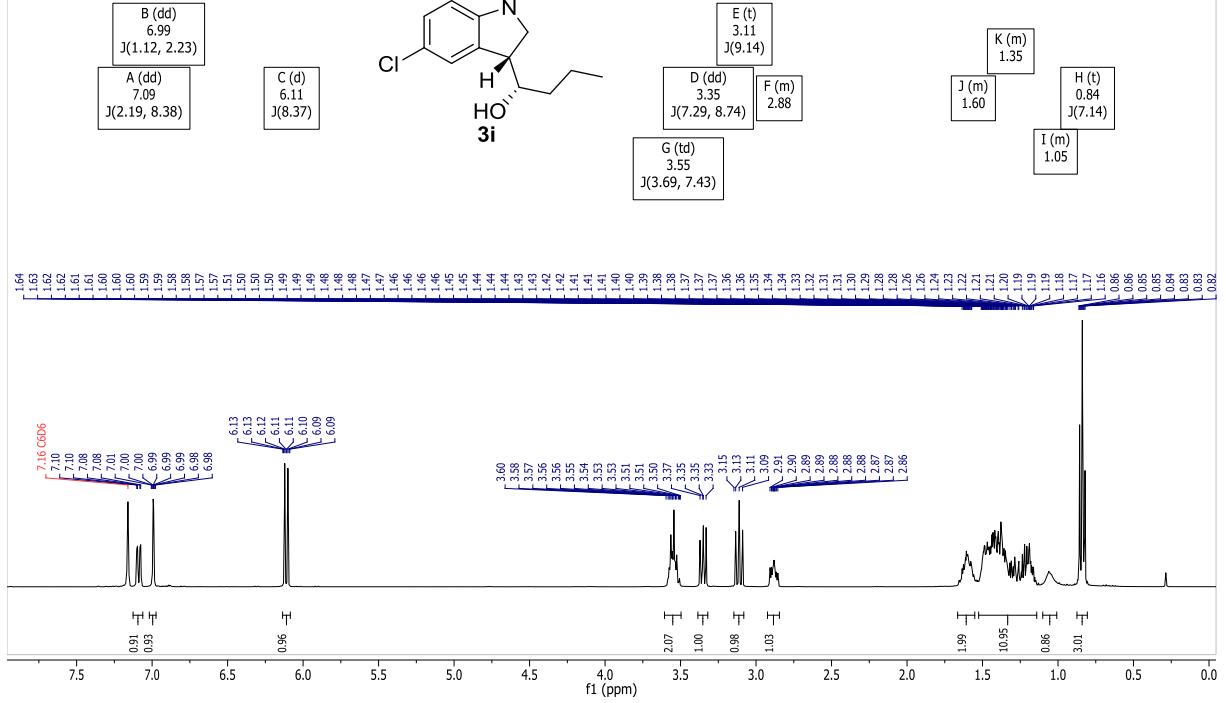

03t4b055.19.11.fid  
 Instrument Bruker AV I 400 MHz  
 AK Prof. Gansaeuer  
 Name Weissbarth  
 Titel HW-179p  
 013\_C\_cpd C6D6 E:\\ gansaeue 55

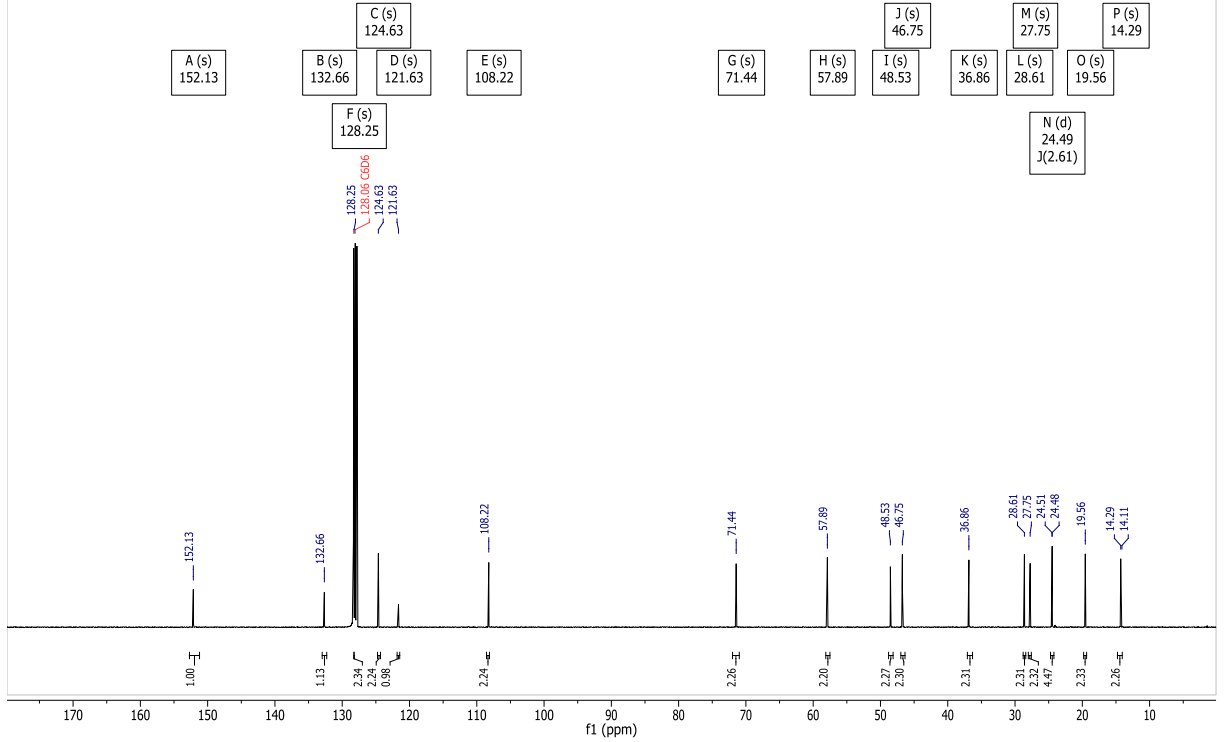

#### 4.4.8 Synthesis of (*S*)-1-((*R*)-5-chloro-1-isopropylindolin-3-yl)butan-1-ol (**3j**).

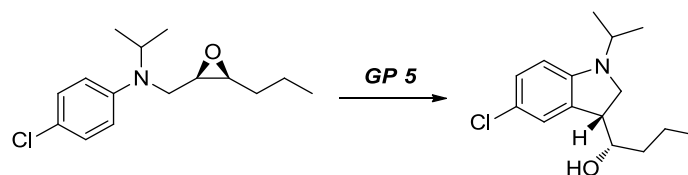

According to GP5: 134 mg of **1j** (1.00 eq., 0.50 mmol), 22 mg lutidinium chloride (0.30 eq., 0.15 mmol), 10 mg zinc (0.30 eq., 0.15 mmol) and 18 mg *ent-cat-Cl*<sub>2</sub> (0.07 eq., 0.035 mmol) are reacted in dry THF for 48 hours at room temperature. Regio- and diastereoisomeric ratio were determined by <sup>13</sup>C-NMR of the crude product. Flash chromatography (SiO<sub>2</sub>, Eluent: CH : MTBE = 90 : 10) yielded 91 mg **3j** (d.r. = > 98 : < 2, 68%) as colorless, viscous oil.

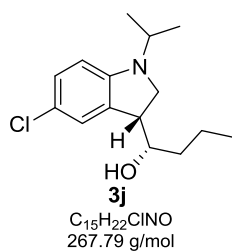

$R_f = 0.5$  (30% MTBE in CH), <sup>1</sup>H-NMR (300 MHz, C<sub>6</sub>D<sub>6</sub>, RT):  $\delta$  [ppm] = 0.81-0.91 (m, 9H), 1.04 (s<sub>br</sub>, 1H) 1.11-1.49 (m, 4H), 2.87 (dddt,  $J = 9.5$  Hz,  $J = 7.3$  Hz,  $J = 3.7$  Hz,  $J = 1.0$  Hz, 1H), 3.06 (dd,  $J = 9.7$  Hz,  $J = 9.8.7$  Hz, 1H) 3.30 (dd,  $J = 8.7$  Hz,  $J = 7.3$  Hz, 1H), 3.40 (dq,  $J = 13.3$  Hz,  $J = 6.7$  Hz, 1H), 3.54 (dt,  $J = 8.8$  Hz,  $J = 3.6$  Hz, 1H), 6.00 (d,  $J = 8.4$  Hz, 1H), 6.99 (dd,  $J = 2.2$  Hz,  $J = 1.1$  Hz, 1H), 7.08 (ddd,  $J = 8.3$  Hz,  $J = 2.2$  Hz,  $J = 0.7$  Hz, 1H). <sup>13</sup>C-NMR (75 MHz, C<sub>6</sub>D<sub>6</sub>, RT):  $\delta$  [ppm] = 14.3, 17.4, 18.5, 19.6, 36.8, 46.0, 46.2, 46.6, 71.5, 108.0, 121.5, 124.8, 128.2, 132.6, 151.2. IR  $\tilde{\nu}$  [cm<sup>-1</sup>] = 711, 800, 809, 1124, 1189, 1263, 1471, 1487; HRMS (ESI):  $m/z$  calculated for [M+H]<sup>+</sup> 268.1463 u found: 268.1461 u;  $[\alpha]_D^{20} = -43.6^\circ$  (c 1, CHCl<sub>3</sub>).

4513a016.18.10.1.1r  
 AK Gansaeuer  
 Name Weissbarth  
 HW-164-S2-F1  
 Tag\_1H\_Standard C6D6 E:\\ gansaeue 16

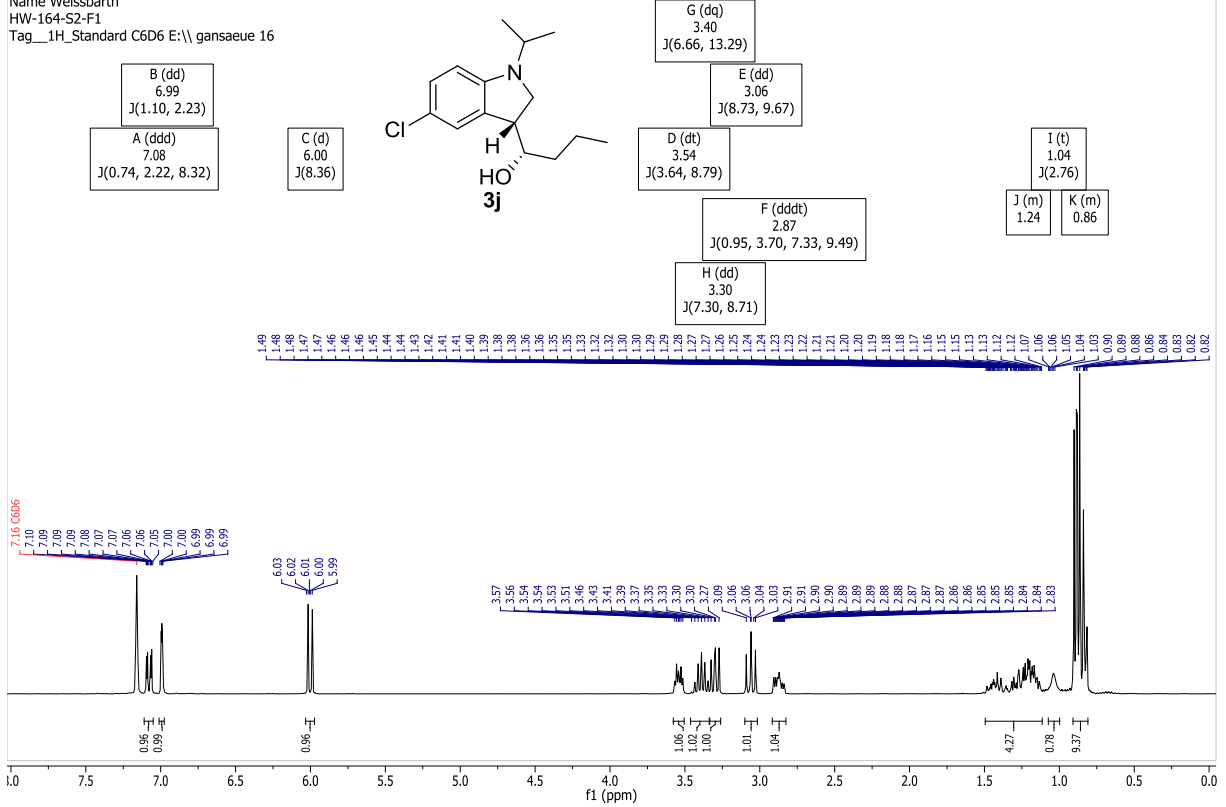

4513a016.18.11.1.1r  
 AK Gansaeuer  
 Name Weissbarth  
 HW-164-S2-F1  
 Nacht\_13C\_cpd\_1k C6D6 E:\\ gansaeue 16

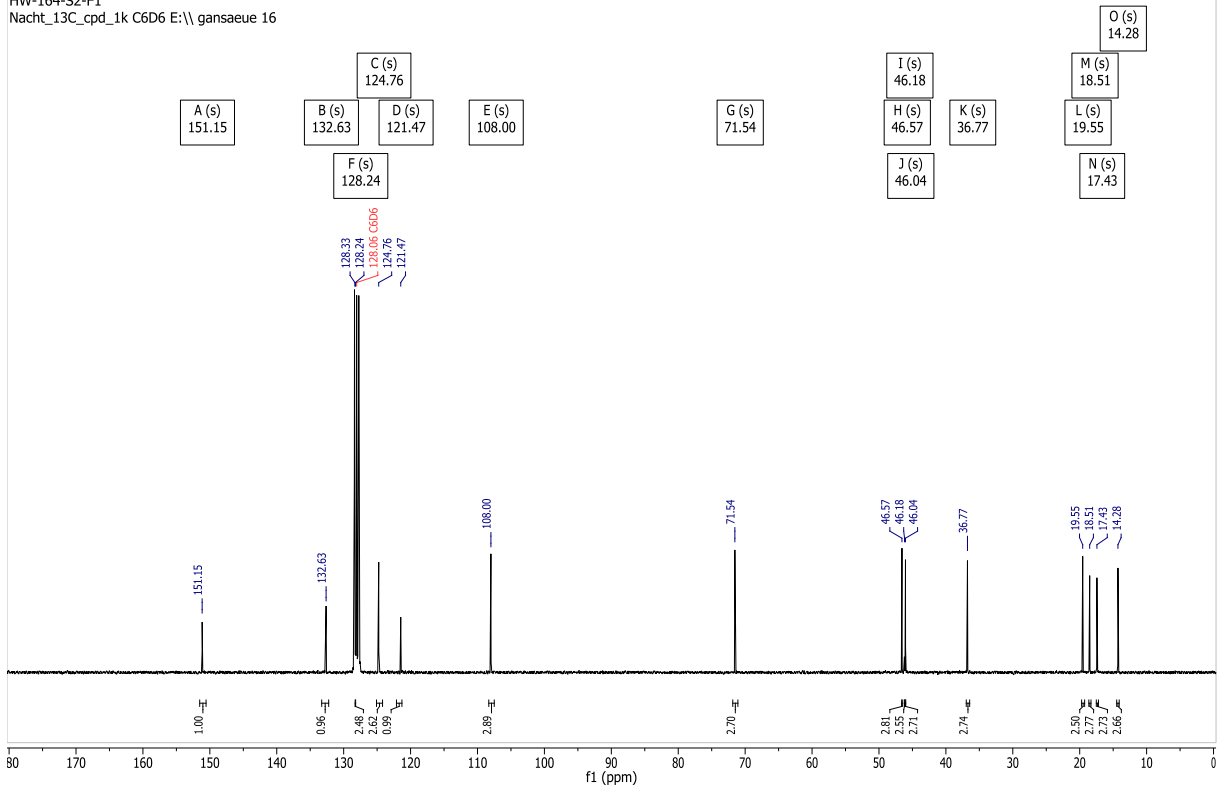

#### 4.4.9 Synthesis of (*S*)-1-((*R*)-5-fluoro-1-isopropylindolin-3-yl)butan-1-ol (**3k**).

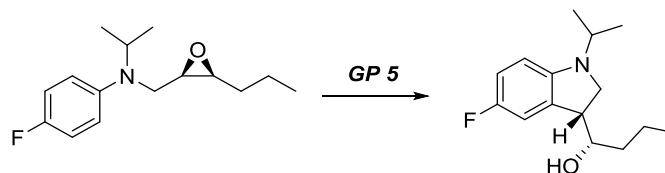

According to GP5: 126 mg of **1k** (1.00 eq., 0.50 mmol), 22 mg lutidinium chloride (0.30 eq., 0.15 mmol), 10 mg zinc (0.30 eq., 0.15 mmol) and 18 mg *ent-cat-Cl*<sub>2</sub> (0.07 eq., 0.035 mmol) are reacted in dry THF for 48 hours at room temperature. Regio- and diastereoisomeric ratio were determined by <sup>13</sup>C-NMR of the crude product. Flash chromatography (SiO<sub>2</sub>, Eluent: CH : MTBE = 90 : 10) yielded 58 mg **3k** (d.r. = > 98 : < 2, 46%) as colorless, viscous oil.

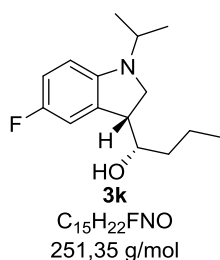

$R_f = 0.5$  (20% EE in CH), <sup>1</sup>H-NMR (300 MHz, C<sub>6</sub>D<sub>6</sub>, RT):  $\delta$  [ppm] = 0.85 (t, 3H,  $J = 7.1$  Hz), 0.91 (d,  $J = 6.6$  Hz, 3H), 0.92 (d,  $J = 6.6$  Hz, 3H), 1.13 (s<sub>br</sub>, 1H) 1.16-1.52 (m, 4H), 2.85-2.95 (m, 1H), 3.09 (t,  $J = 9.1$  Hz, 1H) 3.30 (dd,  $J = 8.7$  Hz,  $J = 7.2$  Hz, 1H), 3.43 (hept,  $J = 6.6$  Hz, 1H), 3.59 (dt,  $J = 8.1$  Hz,  $J = 3.7$  Hz 1H), 6.03 (dd,  $J = 8.5$  Hz,  $J = 4.2$  Hz, 1H), 6.73-6.84 (m, 2H). <sup>13</sup>C-NMR (75 MHz, C<sub>6</sub>D<sub>6</sub>, RT):  $\delta$  [ppm] = 14.3, 17.4, 18.3, 19.6, 36.8, 46.3, 46.6, 46.8 (d,  $J = 1.8$  Hz), 71.6, 107.4 (d,  $J = 7.9$  Hz), 112.2 (d,  $J = 23.7$  Hz), 114.2 (d,  $J = 22.7$  Hz), 132.2 (d,  $J = 7.2$  Hz), 148.8, 156.5 (d,  $J = 233.4$  Hz); <sup>19</sup>F-NMR (470 MHz, C<sub>6</sub>D<sub>6</sub>, RT):  $\delta$  [ppm] = -128.5; IR  $\tilde{\nu}$  [cm<sup>-1</sup>] = 413, 450, 488, 515, 536, 550, 582, 648, 748, 778, 803, 842, 870, 885, 962, 1002, 1030, 1066, 1082, 1095, 1126, 1192, 1210, 1263, 1364, 1388, 1437, 1470, 4187, 2871, 2908, 2953, 3333; HRMS (ESI):  $m/z$  calculated for [M+H]<sup>+</sup> 252.1758 u found: 252.1755 u; [ $\alpha$ ]<sub>D</sub><sup>20</sup> = -57.6° (c 1, CHCl<sub>3</sub>).



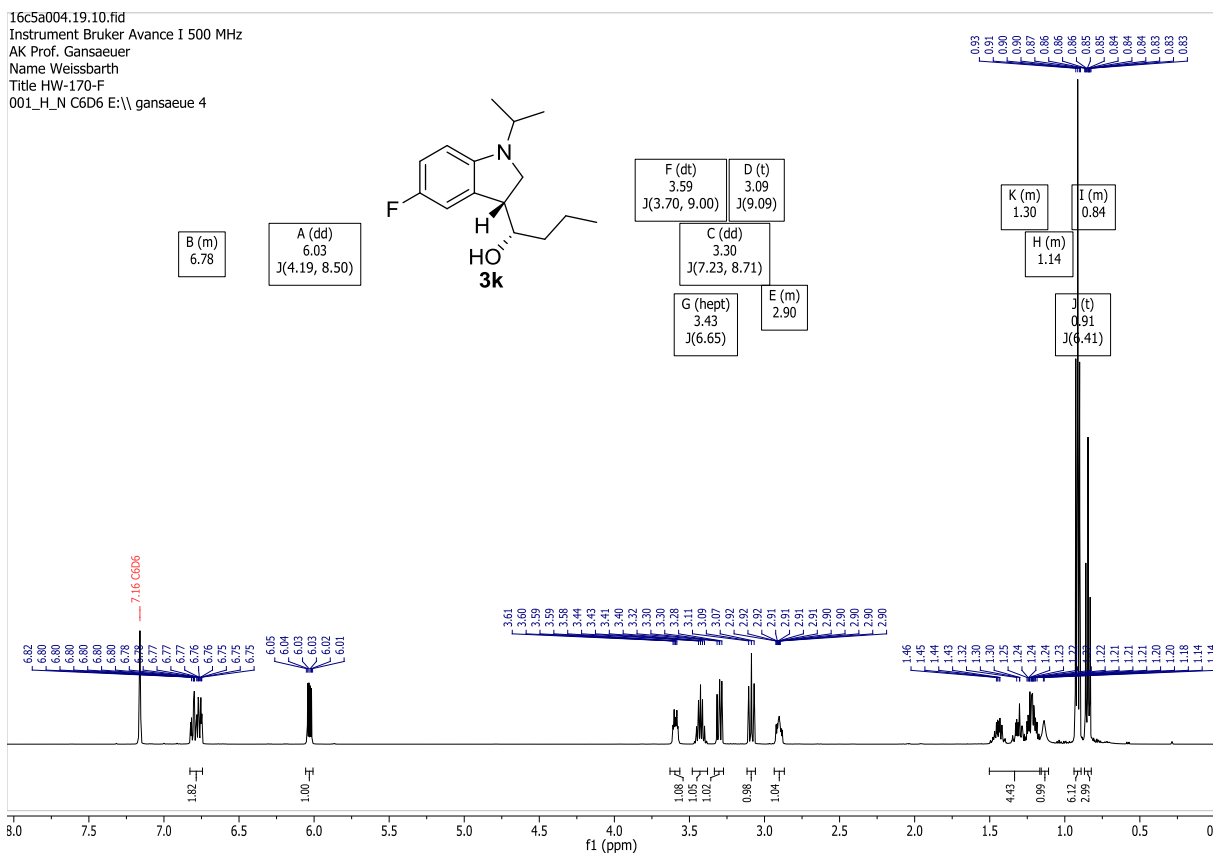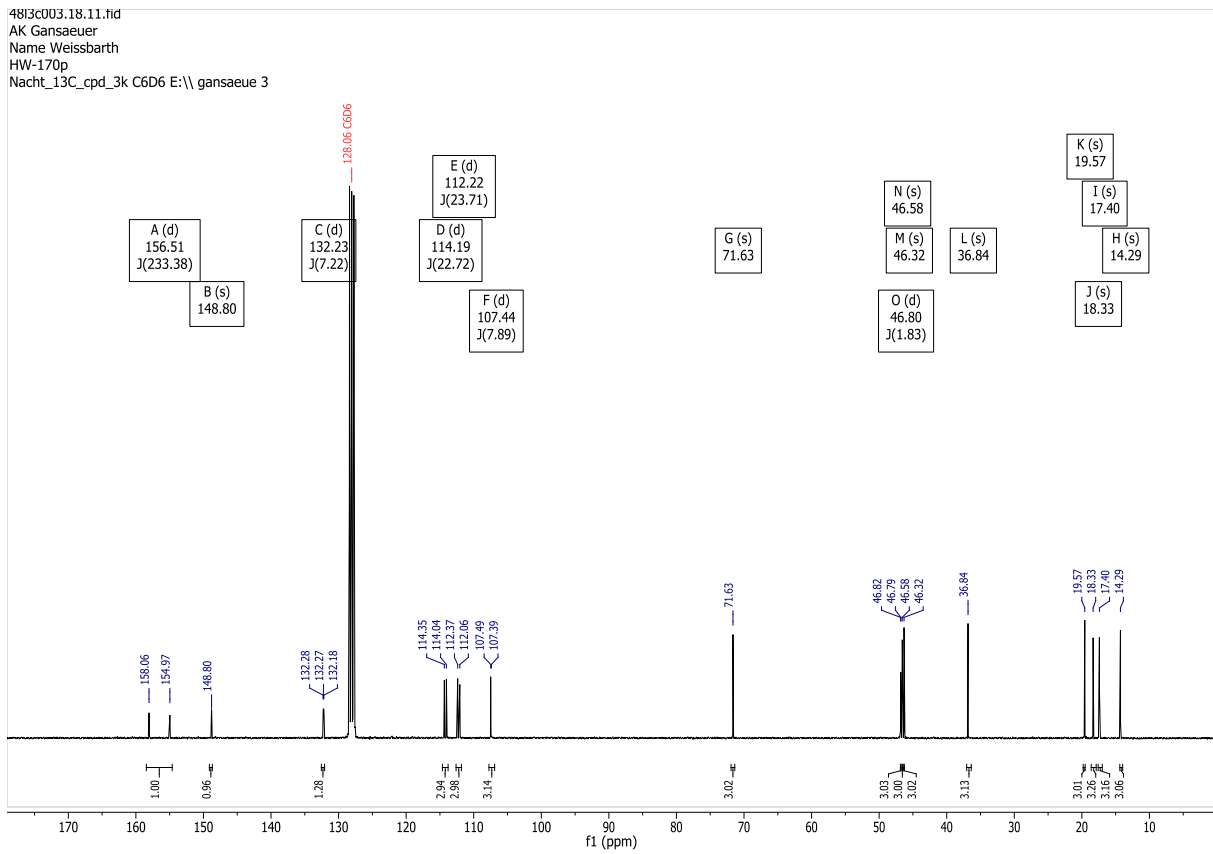

16c5a004.19.11.fid  
Instrument Bruker Avance I 500 MHz  
AK Prof. Gansaeuer  
Name Weissbarth  
Title HW-170-F  
019\_F\_cpd\_H C6D6 E:\\ gansaeue 4

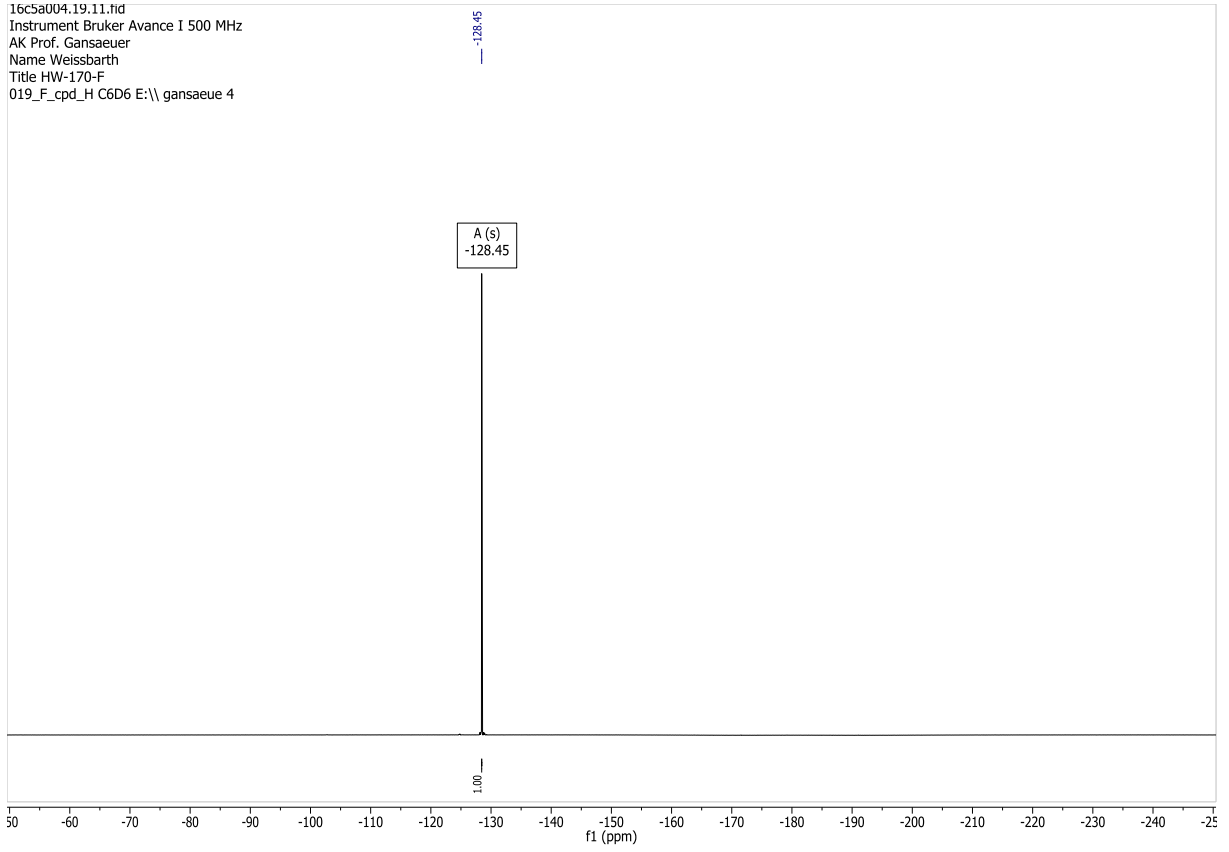

#### 4.4.10 Synthesis of (S)-1-((R)-1-cyclohexyl-5-iodoindolin-3-yl)butan-1-ol (3p).

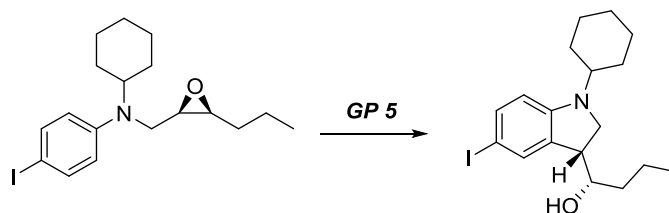

According to GP5: 200 mg of **1p** (1.00 eq., 0.50 mmol), 22 mg lutidinium chloride (0.30 eq., 0.15 mmol), 10 mg zinc (0.30 eq., 0.15 mmol) and 18 mg *ent-cat-Cl*<sub>2</sub> (0.07 eq., 0.035 mmol) are reacted in dry THF for 48 hours at room temperature. Regio- and diastereoisomeric ratio were determined by <sup>13</sup>C-NMR of the crude product. Flash chromatography (SiO<sub>2</sub>, Eluent: CH : MTBE = 90 : 10) yielded 117 mg **3p** (d.r. = > 98 : < 2, 59%) as colorless, viscous oil. The product has to be stored under argon to prevent rapid decomposition.

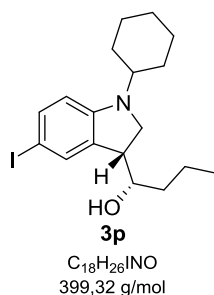

$R_f = 0.6$  (20% EE in CH), <sup>1</sup>H-NMR (500 MHz, C<sub>6</sub>D<sub>6</sub>, RT):  $\delta$  [ppm] = 0.85 (t, 3H,  $J = 7.2$  Hz), 0.88-0.98 (m, 2H), 1.00-1.52 (m, 10H), 1.55-1.67 (m, 3H), 2.88 (ddd,  $J = 9.6$  Hz,  $J = 7.4$  Hz,  $J = 3.5$  Hz, 1H), 3.02 (tq,  $J = 11.2$  Hz,  $J = 3.4$  Hz, 1H), 3.10 (dd,  $J = 9.9$  Hz,  $J = 8.8$  Hz, 1H), 3.35 (dd,  $J = 8.8$  Hz,  $J = 7.4$  Hz, 1H), 3.52 (dt,  $J = 9.0$  Hz,  $J = 3.6$  Hz, 1H), 5.93 (d,  $J = 8.3$  Hz, 1H), 7.29 (t,  $J = 1.5$  Hz, 1H), 7.40 (dd,  $J = 8.3$  Hz,  $J = 1.8$  Hz, 1H). <sup>13</sup>C-NMR (125 MHz, C<sub>6</sub>D<sub>6</sub>, RT):  $\delta$  [ppm] = 14.3, 19.6, 26.0, 26.2, 28.1, 29.5,

36.8, 46.6, 47.2, 54.6, 71.6, 76.5, 109.2, 133.0, 133.6, 137.1, 152.0. IR  $\tilde{\nu}$  [cm<sup>-1</sup>] = 434, 449, 459, 471, 504, 551, 592, 653, 708, 807, 844, 876, 892, 958, 998, 1008, 1083, 1124, 1157, 1227, 1243, 1378, 1424, 1463, 1589, 2886, 2931, 3389 ; HRMS (ESI):  $m/z$  calculated for [M+H]<sup>+</sup> 400.1132 u found: 400.1126 u;  $[\alpha]_D^{20} = -6.6^\circ$  (c 1, CHCl<sub>3</sub>).

14p5a052.19.10.fid  
 Pollux Bruker AV III 500 MHz Prodigy  
 AK Prof. Gansaeuer  
 Name Weissbarth  
 HW-195-SF-F1  
 001\_H\_N C6D6 E:\\ Gansaeue 52

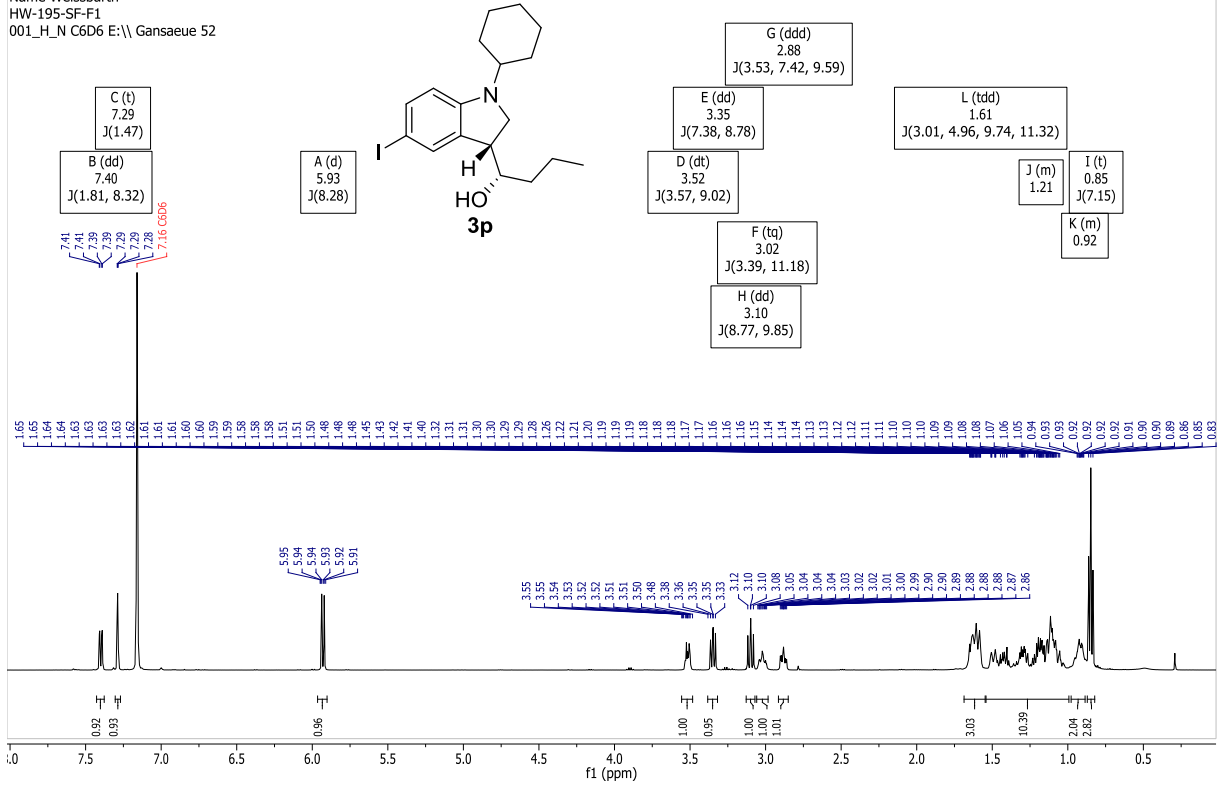

14p5a052.19.11.fid  
 Pollux Bruker AV III 500 MHz Prodigy  
 AK Prof. Gansaeuer  
 Name Weissbarth  
 HW-195-SF-F1  
 013\_C\_cpd\_N C6D6 E:\\ Gansaeue 52

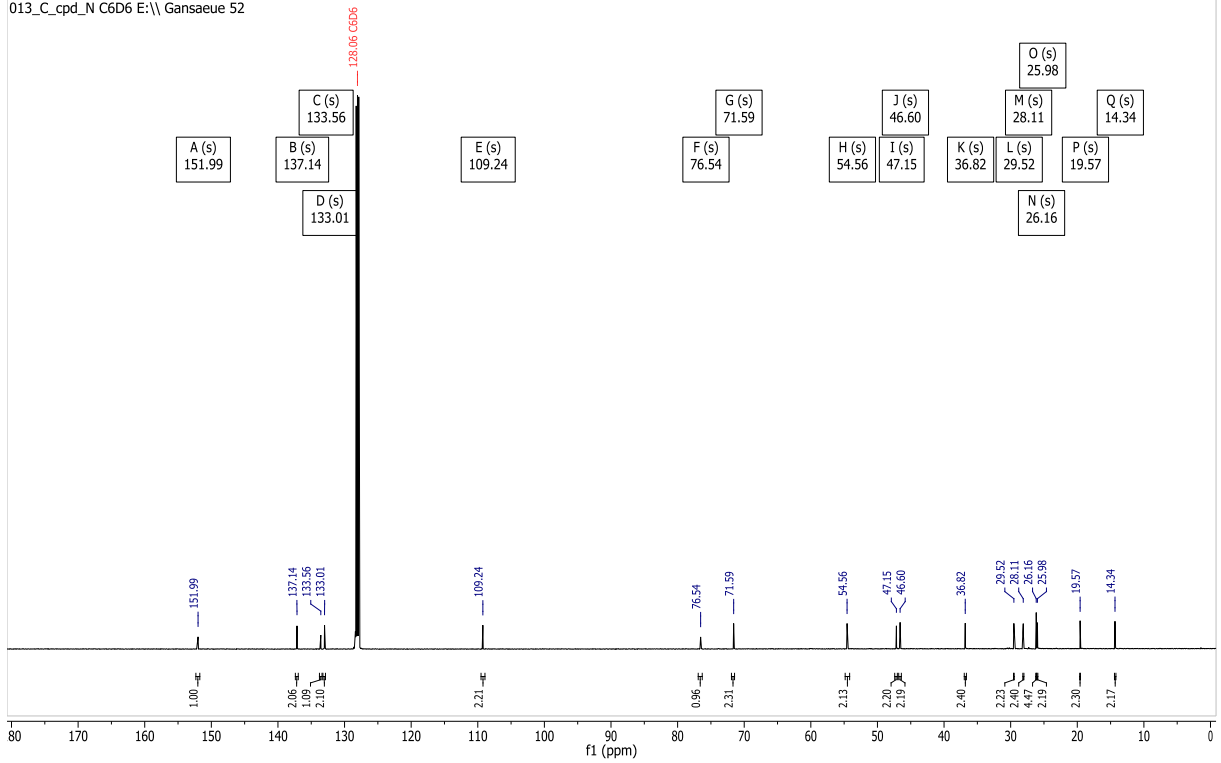

## 5. Synthesis of catalysts for the REO-ArS<sub>R</sub>

The Synthesis of **cat-Cl<sub>2</sub>** and **ent-cat-Cl<sub>2</sub>** were performed according to the literature.<sup>[7]</sup>

### 5.1 Synthesis of cat-(OTs)<sub>2</sub>

1.35 g of **cat-Cl<sub>2</sub>** (1.00 eq., 2.4 mmol) are dissolved in 20 mL DMF and cooled to 0 °C. Over the course of 10 minutes 3.8 mL (2.5 eq., 6.1 mmol) of 1.6M MeLi-solution are added dropwise. After stirring for 30 minutes, 50 mL of 6 w% NH<sub>4</sub>Cl-solution are added, phases are separated and the organic layer is washed with H<sub>2</sub>O and brine. The crude product is reacted without further purification.

The solution of **cat-Me<sub>2</sub>** in Et<sub>2</sub>O is transferred to a Schlenk flask and cooled to 0°C. 0.92 g *p*-Toluenesulfonic acid (2.00 eq., 4.8 mmol) are added. After stirring for 30 minutes at 0°C the ice bath is removed and the reaction mixture is stirred for 90 minutes at room temperature. Half of the solvent is removed under reduced pressure and *n*-pentane is added.

The precipitated solid is washed with *n*-pentane and Et<sub>2</sub>O and dried *in vacuo* for 16h. Cat-(OTs)<sub>2</sub> is obtained as an orange solid (1.35 g, 1.7 mmol, 70%).

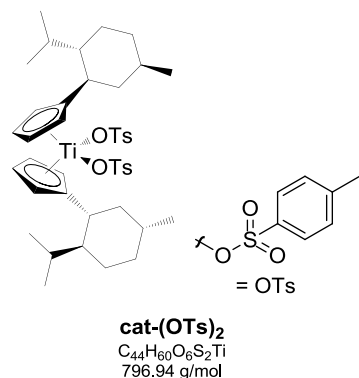

**<sup>1</sup>H-NMR (500 MHz, C<sub>6</sub>D<sub>6</sub>, RT): δ [ppm] = 0.57 (d, 6H, *J* = 6.9 Hz), 0.63 (d, 6H, *J* = 6.9 Hz), 0.75-0.88 (m, 8H), 1.01 (d, 6H, *J* = 5.6 Hz), 1.08-1.16 (m, 2H), 1.29 (dhept, 2H, *J* = 6.7 Hz, *J* = 2.0 Hz), 1.46-1.52 (m, 2H), 1.63 (dd, 2H, *J* = 11.6 Hz, *J* = 3.3 Hz, *J* = 2.1 Hz), 1.73-1.79 (m,**

**2H), 1.97 (s, 6H), 2.20-2.28 (m, 2H), 6.09 (dd, 2H, *J* = 2.8 Hz, *J* = 2.8 Hz), 6.66 (dd, 2H, *J* = 2.4 Hz, *J* = 2.4 Hz), 6.82 (s, 2H), 6.97 (d, 4H, *J* = 8.0 Hz); 7.22 (s, 2H), 8.32 (d, 4H, *J* = 8.1 Hz). **<sup>13</sup>C-NMR (125 MHz, C<sub>6</sub>D<sub>6</sub>, RT): δ [ppm] = 15.3, 21.1, 21.6, 22.9, 25.0, 27.6, 32.6, 35.2, 40.2, 41.5, 50.6, 110.3, 122.1, 127.4, 129.4, 140.9, 141.8, 150.4.****

S106

33c5a031.17.10.fid  
 Instrument Bruker Avance I 500 MHz  
 AK Prof. Gansaeuer  
 Name Muehlhaus  
 fxm350 Tos-Kag  
 001\_H\_Standard C6D6 E:\ gansaeue 31

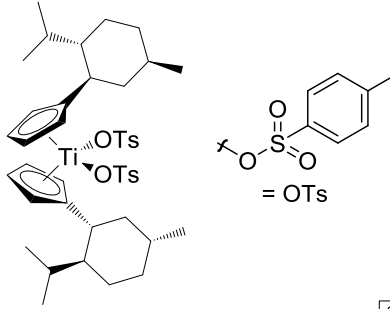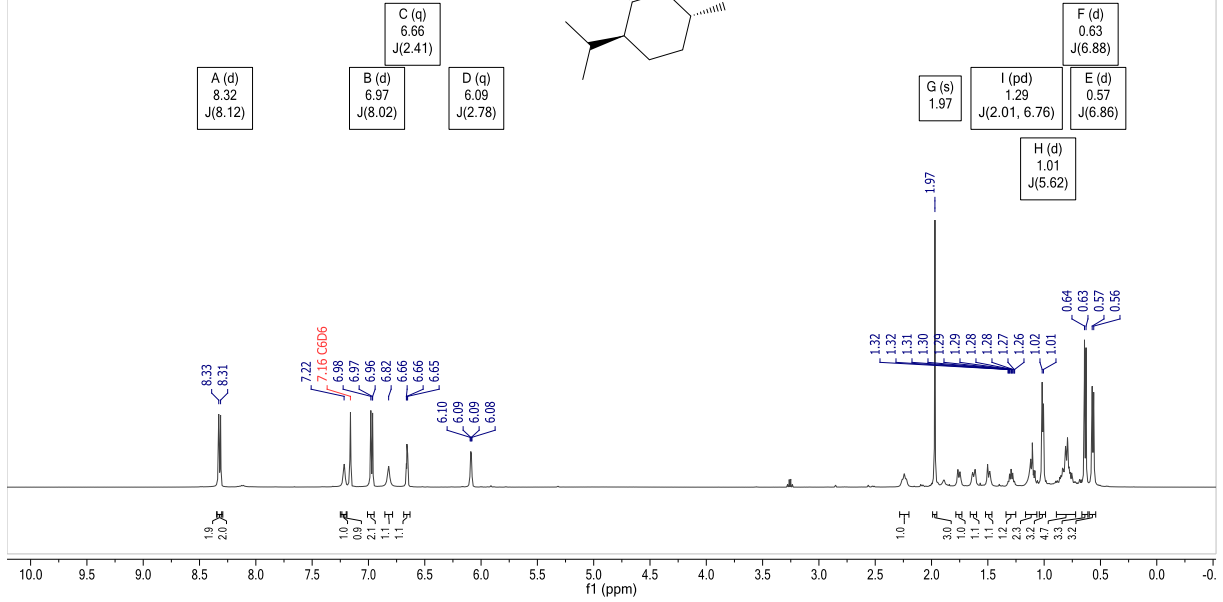

33c5a031.17.11.fid  
 Instrument Bruker Avance I 500 MHz  
 AK Prof. Gansaeuer  
 Name Muehlhaus  
 fxm350 Tos-Kag  
 013\_C\_cpnd\_N C6D6 E:\ gansaeue 31

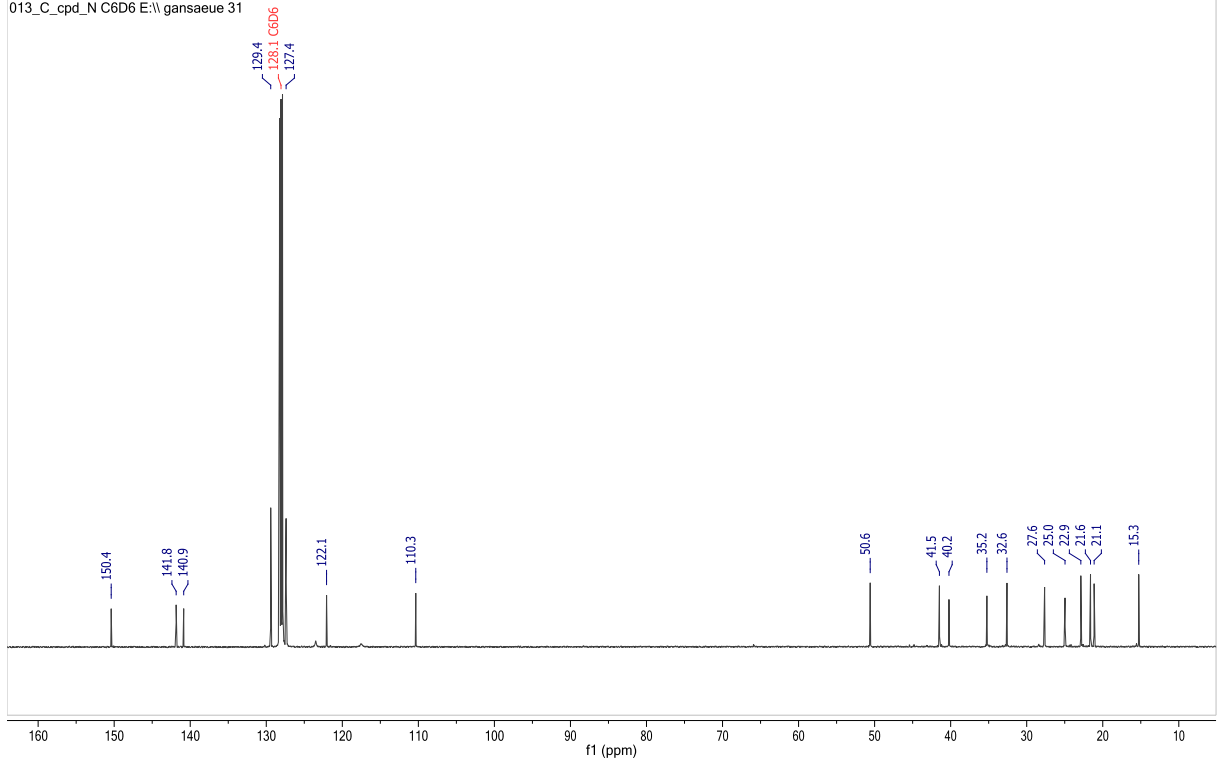

## 6. References

- [1] D. A. L. Otte, D. E. Borchmann, C. Lin, M. Weck, K. A. Woerpel, *Org. Lett.* **2014**, *16*, 1566-1569.
- [2] a) G. M. Sheldrick, *Acta Cryst.* **2015**, *A71*, 3-8; b) G. M. Sheldrick, *Acta Cryst.* **2015**, *C71*, 3-8.
- [2] D. X. Hu, G. M. Shibaya, N.Z. Burns, *J. Am. Chem. Soc.* **2013**, *135*, 12960-12963.
- [3] C. Meister, H.-D. Scharf, *Synthesis* **1981**, *9*, 733-736.
- [4] a) M. Tokunaga, J. F. Larrow, K. Kakuichi, E. N. Jacobsen, *Science* **1997**, *277*, 936-938; b) S. E. Schauss, B. D. Brandes, J. F. Larrow, M. Tokunaga, K. B. Hansen, A. E. Gould, M. E. Farrow, E. N. Jacobsen, *J. Am. Chem. Soc.* **2002**, *124*, 1307-1315.
- [5] a) L. E. Overman, L. A. Flippin, *Tetrahedron Lett.* **1981**, *22*, 195-196; b) L. E. Overman, M. Kakimoto, M. E. Okazaki, G. P. Meier, *J. Am. Chem. Soc.* **1983**, *105*, 6622-6629.
- [6] A. Gansäuer, C. Kube, K. Daasbjerg, R. Sure, S. Grimme, G. D. Fianu, D. V. Sadasivam, R. A. Flowers II, *J. Am. Chem. Soc.* **2014**, *136*, 1663-1671.
- [7] A. Gansäuer, S. Narayan, N. Schiffer-Ndene, H. Bluhm, J. E. Oltra, J. M. Cuerva, A. Rosales, M. Nieger, *J. Organomet. Chem.* **2006**, *691*, 2327-2331.
